# Supplementary material for: Competition in the chaperone-client network subordinates cell-cycle entry to growth and stress
Source: Life Sci Alliance. 2019 Apr 15;2(2):e201800277. doi: 10.26508/lsa.201800277 (PMC6467244; doi:10.26508/lsa.201800277)
Supplement: Supplementary file 1 [file LSA-2018-00277_SdataF1.xlsx]

## Sheet: Panel C
Nuclear to cytoplasmic ratios of mCitrine-Cln3-11A and GFP
	mCitrine-Cln3-11A			GFP
	wt	ydj1		wt	ydj1
mean	2.09838	1.2592		2.46852	2.50247
sd	0.418179	0.222917		0.267999	0.248919
N	44	44		44	44
CL(0.05)	0.123562	0.0658666		0.0791871	0.0735495
	1.18671	0.905097		1.78386	1.93695
	1.20041	0.919471		2.02786	2.03478
	1.3066	0.953833		2.09211	2.11703
	1.52041	0.968701		2.10365	2.16948
	1.6239	0.980263		2.12591	2.16994
	1.65126	1.01746		2.12639	2.18665
	1.66015	1.0321		2.15785	2.24798
	1.678	1.04277		2.19558	2.27754
	1.76591	1.04577		2.26581	2.30602
	1.77157	1.07364		2.29288	2.31236
	1.85466	1.08967		2.29485	2.38359
	1.86381	1.09705		2.34045	2.38514
	1.87068	1.10206		2.35169	2.38759
	1.91152	1.13582		2.36622	2.39874
	1.91275	1.13926		2.37805	2.40178
	1.92514	1.14965		2.4043	2.4327
	1.94981	1.15285		2.41238	2.43645
	1.98397	1.15595		2.41747	2.43796
	2.01289	1.19239		2.42159	2.45139
	2.03974	1.20411		2.42525	2.46888
	2.10701	1.22145		2.43047	2.48259
	2.11378	1.22746		2.4365	2.48614
	2.1406	1.23031		2.44167	2.48914
	2.16512	1.23558		2.46126	2.49473
	2.18304	1.25215		2.47212	2.50287
	2.19907	1.28552		2.49218	2.50872
	2.21924	1.30052		2.53348	2.54341
	2.24272	1.31552		2.56498	2.5643
	2.24457	1.35812		2.56639	2.57454
	2.24883	1.36373		2.57525	2.5808
	2.28941	1.37122		2.5807	2.58783
	2.35451	1.3855		2.5883	2.62838
	2.3561	1.39554		2.59072	2.64225
	2.37201	1.41169		2.62528	2.67743
	2.41399	1.4181		2.6521	2.69802
	2.4195	1.43337		2.65711	2.70508
	2.456	1.46471		2.73807	2.71058
	2.58708	1.48392		2.77842	2.77386
	2.61453	1.52307		2.77977	2.79867
	2.62168	1.54688		2.80722	2.81466
	2.6424	1.56759		2.80739	2.90977
	2.85949	1.63967		2.97883	2.9163
	2.87771	1.73693		2.98151	2.9943
	2.9104	1.87854		3.09121	3.08146

## Sheet: Panel D
Nuclear to cytoplasmic ratios of Cdc28-GFP
	Cdc28-GFP, mid G1				Cdc28-GFP, late G1
	wt	ydj1	oYdj1 oSsa1		wt	ydj1	oYdj1 oSsa1
mean	0.993435	0.985072	1.07786		1.08759	1.00787	1.17007
sd	0.0872	0.128921	0.11547		0.114581	0.137875	0.156595
N	91	93	76		128	100	94
CL(0.05)	0.0179161	0.0262018	0.0259602		0.0198498	0.027023	0.0316564
	0.711505	0.757964	0.847463		0.830976	0.69918	0.859661
	0.835046	0.765672	0.865767		0.857308	0.742746	0.862839
	0.835267	0.767581	0.872832		0.880167	0.747614	0.872899
	0.863596	0.791232	0.908784		0.8926	0.751909	0.893405
	0.866656	0.793251	0.917393		0.912118	0.791063	0.8974
	0.869387	0.802903	0.921723		0.918195	0.807534	0.93905
	0.871961	0.808213	0.933755		0.918438	0.815677	0.954344
	0.883009	0.816431	0.947267		0.921345	0.821116	0.954464
	0.892951	0.823389	0.956388		0.928525	0.821133	0.979479
	0.898332	0.82755	0.960084		0.932157	0.821265	0.981052
	0.9016	0.832496	0.960373		0.935631	0.836708	0.985767
	0.904858	0.833396	0.96488		0.940339	0.839772	0.987299
	0.90664	0.84342	0.969695		0.94533	0.843416	0.987593
	0.909343	0.843797	0.974265		0.947988	0.854239	0.998094
	0.911901	0.846029	0.975437		0.954284	0.858496	1.00305
	0.913876	0.85026	0.980223		0.958816	0.860849	1.00856
	0.915566	0.854508	0.983015		0.961008	0.8612	1.01598
	0.916404	0.860083	0.983801		0.962631	0.862984	1.0215
	0.936983	0.873607	0.989277		0.962967	0.873853	1.0229
	0.937748	0.874645	0.991849		0.969627	0.883018	1.04381
	0.939056	0.874781	0.993088		0.975732	0.88623	1.04405
	0.941231	0.884088	1.00093		0.977227	0.888338	1.04824
	0.944028	0.884103	1.0133		0.980771	0.890172	1.0497
	0.944354	0.887922	1.01392		0.983359	0.890346	1.05182
	0.945292	0.89271	1.01419		0.992695	0.890549	1.05403
	0.946807	0.894947	1.01747		1.00182	0.894791	1.05437
	0.946939	0.899253	1.01769		1.0038	0.900147	1.05644
	0.951957	0.907431	1.02064		1.00407	0.901287	1.06518
	0.953851	0.912006	1.02288		1.00531	0.903853	1.06717
	0.954845	0.914117	1.03354		1.00655	0.90777	1.06879
	0.955806	0.917238	1.0343		1.00727	0.928934	1.07308
	0.957479	0.91872	1.04085		1.00753	0.937697	1.08285
	0.958234	0.920371	1.04123		1.01325	0.943326	1.08464
	0.958289	0.929942	1.05495		1.01505	0.943954	1.08618
	0.962221	0.931463	1.06188		1.01751	0.945296	1.08677
	0.968476	0.933524	1.06383		1.01795	0.953224	1.09548
	0.969638	0.934683	1.06818		1.01952	0.956227	1.0979
	0.971002	0.946504	1.07223		1.02188	0.957027	1.10631
	0.972074	0.948401	1.0758		1.02396	0.957724	1.11748
	0.976533	0.956818	1.07944		1.03016	0.969546	1.12085
	0.978801	0.962005	1.08049		1.03025	0.971499	1.12693
	0.980114	0.969014	1.08345		1.03132	0.988226	1.13234
	0.981091	0.969664	1.08993		1.03148	0.991165	1.13453
	0.982222	0.971203	1.09465		1.0315	0.999711	1.14213
	0.982256	0.974433	1.09484		1.03345	1.00236	1.14863
	0.98661	0.976067	1.09522		1.03552	1.00409	1.15039
	0.989477	0.976658	1.10101		1.03859	1.00713	1.15345
	1.00675	0.978828	1.10638		1.04182	1.01128	1.16112
	1.01023	0.978865	1.10907		1.04281	1.01242	1.1791
	1.01039	0.983172	1.11444		1.04626	1.01516	1.18232
	1.01042	0.983499	1.12055		1.04648	1.01567	1.18373
	1.01235	0.985668	1.12569		1.05419	1.01614	1.18889
	1.01514	0.986112	1.12669		1.0561	1.01629	1.19256
	1.01649	0.990285	1.13133		1.05614	1.02653	1.1966
	1.01676	0.992755	1.13414		1.06221	1.03401	1.20795
	1.01678	0.994384	1.1387		1.06506	1.03956	1.20852
	1.02533	1.00016	1.14038		1.06532	1.04228	1.2139
	1.02573	1.01815	1.14298		1.06703	1.04571	1.22725
	1.02984	1.01952	1.14628		1.06822	1.05355	1.23374
	1.03138	1.02205	1.15652		1.07247	1.05445	1.23657
	1.03279	1.02289	1.15891		1.0747	1.05652	1.23991
	1.04103	1.02856	1.16115		1.07559	1.06333	1.2508
	1.04144	1.03117	1.18068		1.07574	1.06513	1.25178
	1.04276	1.03878	1.18629		1.0775	1.06596	1.25966
	1.04358	1.0403	1.18877		1.07815	1.07643	1.2629
	1.04402	1.04049	1.19655		1.0825	1.07732	1.26858
	1.04406	1.05078	1.1989		1.08677	1.07733	1.27388
	1.04453	1.05438	1.23257		1.08721	1.08204	1.2771
	1.04701	1.06258	1.24777		1.08893	1.08666	1.28373
	1.05033	1.06962	1.27094		1.0923	1.08672	1.29876
	1.05152	1.06974	1.27812		1.09251	1.08859	1.30334
	1.05437	1.07038	1.28373		1.0932	1.08899	1.30658
	1.05736	1.07654	1.30366		1.09371	1.09196	1.31152
	1.05802	1.08583	1.31678		1.09389	1.09196	1.31262
	1.06001	1.09732	1.35404		1.09677	1.09717	1.31379
	1.07136	1.11321	1.38152		1.09873	1.10615	1.32745
	1.07335	1.12465			1.10108	1.10654	1.32851
	1.07451	1.12609			1.10265	1.10745	1.33095
	1.07457	1.129			1.10481	1.10844	1.33276
	1.07667	1.12943			1.10663	1.11027	1.34427
	1.08392	1.14456			1.10702	1.11478	1.35458
	1.08495	1.15338			1.10807	1.12002	1.36109
	1.08513	1.15714			1.11309	1.12767	1.36778
	1.08523	1.15896			1.11461	1.12879	1.37092
	1.09022	1.165			1.12045	1.13415	1.38663
	1.09138	1.17404			1.12256	1.13639	1.38728
	1.09312	1.17906			1.12313	1.13916	1.40142
	1.10845	1.18005			1.12432	1.14343	1.40487
	1.12853	1.19165			1.13168	1.1537	1.40519
	1.17126	1.19861			1.13373	1.15589	1.42518
	1.38823	1.26105			1.13954	1.15882	1.42701
		1.34198			1.14099	1.16203	1.46468
		1.35657			1.14137	1.17104	1.4734
					1.14604	1.19174	1.49614
					1.15135	1.23723
					1.15837	1.24057
					1.15875	1.25379
					1.16399	1.33359
					1.16623	1.36821
					1.16753	1.39319
					1.17026
					1.1726
					1.1729
					1.17398
					1.17729
					1.17857
					1.18582
					1.19139
					1.19752
					1.203
					1.22091
					1.2238
					1.24107
					1.24205
					1.2438
					1.25906
					1.26066
					1.26536
					1.2674
					1.28235
					1.29311
					1.31333
					1.31345
					1.31373
					1.31984
					1.38379
					1.39507
					1.40114

## Sheet: Panel G
Cdc28-GFP nuclear import rate (Ki)
	G1 cells
	wt	cln3	ydj1	AZC
mean	0.246964	0.125898	0.171023	0.204498
sd	0.0359159	0.0290565	0.0506141	0.0298429
N	33	33	33	33
CL(0.05)	0.012254	0.00991367	0.0172688	0.010182
	0.189786	0.0865288	0.082269	0.126371
	0.208174	0.0944698	0.0895172	0.146474
	0.209572	0.0948628	0.0982887	0.156226
	0.209976	0.097337	0.109417	0.168419
	0.210262	0.0979748	0.110733	0.173455
	0.211038	0.0984968	0.114683	0.177109
	0.212244	0.101101	0.117011	0.178878
	0.21452	0.10169	0.1248	0.181066
	0.219909	0.101812	0.131718	0.182005
	0.226029	0.10911	0.141765	0.195479
	0.226214	0.111681	0.144196	0.195678
	0.22879	0.112493	0.144376	0.195981
	0.231247	0.118538	0.146423	0.198918
	0.235103	0.118681	0.156867	0.2017
	0.240271	0.119792	0.169538	0.202479
	0.243265	0.123321	0.171046	0.206147
	0.243283	0.123359	0.174948	0.208328
	0.243964	0.123466	0.178616	0.209338
	0.245967	0.123579	0.180776	0.209441
	0.246795	0.125373	0.182654	0.216092
	0.25228	0.125684	0.186811	0.218068
	0.256199	0.129953	0.187991	0.218837
	0.256345	0.133806	0.196679	0.219235
	0.268095	0.135785	0.20299	0.222622
	0.269231	0.136957	0.209538	0.224786
	0.269917	0.141796	0.214851	0.229444
	0.270578	0.143251	0.221517	0.230608
	0.271533	0.145179	0.221546	0.236233
	0.278416	0.151575	0.228135	0.236668
	0.293098	0.157612	0.231875	0.240836
	0.2962	0.161778	0.239825	0.243862
	0.301817	0.170304	0.243407	0.247618
	0.369678	0.237289	0.288941	0.250046

## Sheet: Panel H
GFP-2NLS nuclear import rate (Ki)
	G1 cells
	wt	cln3	ydj1
mean	0.205824	0.194308	0.184256
sd	0.0686748	0.0627319	0.0810188
N	30	30	35
CL(0.05)	0.0245745	0.0224479	0.0268411
	0.111613	0.101139	0.101105
	0.114587	0.1144	0.102388
	0.133302	0.119953	0.108945
	0.135923	0.121345	0.113198
	0.136349	0.127012	0.119447
	0.14498	0.129994	0.120207
	0.145129	0.13695	0.124281
	0.155489	0.141267	0.127905
	0.156673	0.156613	0.128476
	0.15991	0.159349	0.131194
	0.165218	0.162592	0.13623
	0.166005	0.171172	0.137255
	0.173423	0.174331	0.141815
	0.175616	0.18105	0.142309
	0.179741	0.18211	0.150336
	0.182147	0.183077	0.150429
	0.182667	0.185266	0.151145
	0.220125	0.186046	0.151689
	0.220816	0.206164	0.157588
	0.222723	0.220263	0.161165
	0.225062	0.22796	0.168053
	0.248811	0.231058	0.169494
	0.254885	0.238057	0.17755
	0.271658	0.238478	0.185231
	0.297998	0.253361	0.196819
	0.302283	0.253991	0.197196
	0.30763	0.257545	0.226815
	0.30864	0.306689	0.232845
	0.33565	0.326445	0.251869
	0.339675	0.335562	0.271051
			0.280274
			0.29895
			0.322709
			0.349011
			0.463986
