# Supplementary material for: Competition in the chaperone-client network subordinates cell-cycle entry to growth and stress
Source: Life Sci Alliance. 2019 Apr 15;2(2):e201800277. doi: 10.26508/lsa.201800277 (PMC6467244; doi:10.26508/lsa.201800277)
Supplement: Supplementary file 2 [file LSA-2018-00277_SdataF2.xlsx]

## Sheet: Panel A
Budding volumes (r.u.) in asynchronous cells
	mean	CL (0.05)
empty	1.00004	0.0230745
S	0.928339	0.0354692
H	0.926907	0.0341228
C	0.907403	0.028265
H+S	0.861487	0.0337334
C+H	0.887659	0.0258636
C+H+S	0.816454	0.0290268

## Sheet: Panel B
Budding volumes (r.u.) in newly-born cells
	wt			cln3			whi5			whi5 stb1 cln3			whi7
	empty	C+H+S		empty	C+H+S		empty	C+H+S		empty	C+H+S		empty	C+H+S
mean	1	0.646383		1.45013	1.35557		0.636642	0.583954		1.03783	1.02253		0.840323	0.629963
sd	0.520164	0.28758		0.711166	0.493048		0.252564	0.215482		0.436797	0.500818		0.338546	0.236468
N	430	428		430	430		411	430		429	429		430	430
CL(0.05)	0.0491647	0.0272449		0.0672179	0.0466018		0.0244174	0.0203669		0.0413332	0.0473914		0.0319986	0.0223504
	0.323607	0.154837		0.382729	0.451488		0.269771	0.221242		0.266569	0.206015		0.0927197	0.123583
	0.344704	0.159525		0.413723	0.49915		0.270425	0.278922		0.280113	0.210963		0.236487	0.135824
	0.362154	0.176845		0.433517	0.541082		0.273203	0.279412		0.313971	0.26696		0.256672	0.136996
	0.366451	0.182965		0.433647	0.544208		0.275327	0.282843		0.320222	0.299907		0.262532	0.158613
	0.385985	0.186351		0.45266	0.554105		0.279575	0.283007		0.320222	0.360852		0.299646	0.177626
	0.392626	0.196248		0.477142	0.575461		0.286275	0.286111		0.320222	0.371009		0.304725	0.188956
	0.412941	0.201978		0.554625	0.594865		0.289542	0.289052		0.320222	0.383641		0.321524	0.189476
	0.413202	0.205754		0.565955	0.596688		0.297386	0.298039		0.342881	0.386245		0.33689	0.194946
	0.42375	0.214089		0.56895	0.598381		0.298529	0.302941		0.394189	0.398096		0.34223	0.214349
	0.425443	0.218907		0.604371	0.60346		0.31585	0.304412		0.396533	0.408123		0.357205	0.216824
	0.431563	0.225679		0.614659	0.628593		0.31585	0.310131		0.398226	0.408253		0.363456	0.224507
	0.437033	0.251854		0.631458	0.630156		0.332843	0.314869		0.399919	0.408253		0.382469	0.22646
	0.445107	0.26097		0.633281	0.637709		0.342974	0.31585		0.399919	0.408253		0.383511	0.244301
	0.450706	0.261621		0.63862	0.639271		0.345915	0.320261		0.399919	0.416067		0.384422	0.245212
	0.455525	0.265658		0.666228	0.65008		0.349346	0.321895		0.399919	0.419583		0.386897	0.24964
	0.457218	0.266309		0.666879	0.657763		0.353268	0.323039		0.399919	0.422969		0.397445	0.25524
	0.457348	0.268913		0.671306	0.66193		0.356863	0.328105		0.399919	0.422969		0.402654	0.260318
	0.460604	0.27282		0.676515	0.678339		0.358824	0.328595		0.399919	0.422969		0.403565	0.260449
	0.474538	0.281675		0.677557	0.679771		0.360458	0.331373		0.399919	0.422969		0.404477	0.27256
	0.480398	0.285582		0.679771	0.682636		0.361601	0.341667		0.399919	0.432866		0.406951	0.278941
	0.482481	0.287535		0.683157	0.68524		0.368137	0.343464		0.399919	0.45865		0.410988	0.279461
	0.488992	0.287666		0.683808	0.689277		0.368791	0.346078		0.399919	0.45865		0.415285	0.281154
	0.492639	0.291051		0.692663	0.692533		0.369118	0.346569		0.417369	0.45865		0.416067	0.285842
	0.49355	0.291312		0.692924	0.694486		0.374346	0.348366		0.41789	0.45865		0.417109	0.285842
	0.493941	0.293135		0.694877	0.695919		0.375327	0.35		0.420234	0.462296		0.417629	0.298604
	0.496806	0.296651		0.699044	0.700737		0.375654	0.352614		0.42375	0.46438		0.420755	0.299256
	0.497197	0.303292		0.718969	0.707379		0.378431	0.352778		0.42388	0.465812		0.428308	0.306939
	0.497587	0.309153		0.71988	0.724308		0.380556	0.352941		0.436772	0.469459		0.428699	0.307329
	0.497848	0.316706		0.737721	0.729256		0.384314	0.355882		0.442372	0.474668		0.436252	0.313059
	0.49915	0.319961		0.737981	0.734856		0.385131	0.356536		0.450706	0.47584		0.437033	0.315273
	0.504359	0.323217		0.741367	0.735898		0.385294	0.357353		0.453311	0.477402		0.438205	0.316836
	0.506312	0.324389		0.74293	0.737721		0.386765	0.358987		0.466203	0.484435		0.4412	0.316966
	0.509177	0.329468		0.745534	0.743972		0.387418	0.360131		0.469589	0.485346		0.448232	0.318008
	0.509307	0.331291		0.74905	0.747358		0.390196	0.361765		0.469849	0.48743		0.449665	0.322435
	0.514256	0.333114		0.750613	0.750613		0.390686	0.362745		0.475058	0.488602		0.451227	0.325431
	0.514777	0.334677		0.753738	0.757385		0.391667	0.364216		0.489123	0.488992		0.452009	0.329728
	0.521418	0.337802		0.755692	0.758166		0.395915	0.365033		0.489644	0.501885		0.452399	0.334677
	0.521418	0.339625		0.759468	0.758687		0.396569	0.365196		0.496545	0.502796		0.453702	0.335328
	0.527278	0.340797		0.762594	0.761161		0.398039	0.369281		0.503708	0.509828		0.457608	0.339886
	0.528711	0.341188		0.764156	0.762854		0.398039	0.371569		0.504489	0.510349		0.459562	0.341058
	0.530013	0.346918		0.764938	0.768584		0.399673	0.372712		0.519465	0.511521		0.460343	0.34223
	0.532357	0.349262		0.769756	0.773923		0.401471	0.374346		0.524153	0.512303		0.462557	0.343011
	0.533269	0.352778		0.777049	0.780044		0.401634	0.37549		0.526757	0.512823		0.466464	0.345485
	0.533399	0.35434		0.777179	0.780695		0.402778	0.376144		0.535222	0.515688		0.468547	0.345746
	0.534962	0.354731		0.780174	0.789029		0.404085	0.378922		0.535222	0.517642		0.471152	0.34835
	0.535482	0.357726		0.785513	0.78942		0.404739	0.379248		0.535222	0.518423		0.471542	0.349001
	0.542775	0.35981		0.790462	0.792155		0.404902	0.380556		0.535222	0.521679		0.473365	0.349522
	0.543947	0.361242		0.796973	0.796192		0.407026	0.381699		0.535222	0.523372		0.474017	0.352387
	0.544989	0.363717		0.799187	0.797364		0.407516	0.38268		0.535222	0.524023		0.474277	0.35408
	0.548375	0.364107		0.803094	0.798796		0.409477	0.383497		0.535482	0.531315		0.477012	0.35434
	0.549547	0.365019		0.805698	0.804396		0.410458	0.384314		0.536524	0.535743		0.477533	0.356294
	0.549807	0.36593		0.808302	0.806219		0.410784	0.384477		0.537175	0.535743		0.481439	0.35968
	0.556709	0.367884		0.81247	0.811558		0.412745	0.386111		0.538478	0.541082		0.482351	0.362935
	0.55697	0.369056		0.814163	0.814293		0.412745	0.389052		0.54004	0.544077		0.482351	0.363326
	0.557621	0.369186		0.822237	0.816637		0.414542	0.390033		0.540301	0.544338		0.482481	0.369056
	0.558662	0.376479		0.823278	0.818851		0.414869	0.390196		0.546031	0.554365		0.483914	0.369056
	0.558662	0.377781		0.825232	0.830701		0.415359	0.390686		0.547593	0.554886		0.485607	0.37127
	0.56296	0.378041		0.825753	0.837343		0.416667	0.39281		0.554495	0.560746		0.486258	0.373874
	0.564913	0.378692		0.834217	0.842812		0.418791	0.393464		0.555537	0.561658		0.489774	0.374395
	0.565174	0.379864		0.837863	0.846068		0.421242	0.393791		0.562439	0.561658		0.490425	0.375827
	0.567518	0.380516		0.842552	0.84737		0.423039	0.393954		0.565174	0.561658		0.490816	0.382339
	0.567908	0.380776		0.84776	0.848412		0.425817	0.394118		0.583275	0.564653		0.492769	0.383901
	0.568429	0.381948		0.849974	0.848412		0.426471	0.397386		0.585358	0.566867		0.494462	0.385985
	0.569471	0.381948		0.855183	0.848932		0.426634	0.398203		0.586791	0.567387		0.495243	0.386766
	0.571034	0.383771		0.85935	0.849974		0.428595	0.398529		0.593432	0.567648		0.496155	0.388459
	0.573899	0.386506		0.864039	0.854923		0.428758	0.4		0.59799	0.569862		0.49902	0.390933
	0.57494	0.387417		0.866643	0.856486		0.429739	0.4		0.606064	0.570643		0.500061	0.392105
	0.579498	0.38872		0.871592	0.856616		0.432353	0.400163		0.606064	0.576894		0.507875	0.399398
	0.579498	0.390673		0.874717	0.861434		0.432516	0.400817		0.609841	0.583145		0.512433	0.402263
	0.582624	0.395752		0.87641	0.861955		0.432516	0.401471		0.611534	0.58653		0.518684	0.402393
	0.586791	0.397445		0.877582	0.87654		0.43366	0.403268		0.611664	0.591479		0.518944	0.403044
	0.587833	0.399398		0.877582	0.877061		0.434641	0.40768		0.612315	0.591479		0.521028	0.411248
	0.591088	0.403695		0.879796	0.877712		0.435458	0.408007		0.612315	0.591479		0.523893	0.4119
	0.591479	0.404216		0.886177	0.880317		0.437582	0.40915		0.612315	0.593042		0.524283	0.41203
	0.59187	0.404737		0.890214	0.880317		0.440686	0.409641		0.612315	0.595646		0.527669	0.415546
	0.59213	0.405128		0.897897	0.881358		0.441503	0.412092		0.613487	0.595646		0.530534	0.415676
	0.592391	0.405779		0.897897	0.888651		0.444118	0.413399		0.620128	0.595646		0.531576	0.416197
	0.593302	0.406821		0.901413	0.890083		0.444118	0.414216		0.623644	0.600985		0.535352	0.41802
	0.594735	0.410728		0.901673	0.891516		0.445752	0.41634		0.626509	0.604111		0.536524	0.41815
	0.595646	0.41229		0.912873	0.892558		0.446242	0.417157		0.629504	0.611664		0.540431	0.421666
	0.596297	0.41789		0.921728	0.893599		0.447712	0.417484		0.630156	0.613617		0.542645	0.421797
	0.598772	0.418801		0.926807	0.89399		0.447712	0.418954		0.630546	0.614138		0.543036	0.422969
	0.601246	0.419713		0.929932	0.898157		0.44951	0.418954		0.630807	0.614529		0.549677	0.42375
	0.603981	0.419974		0.930192	0.898939		0.450163	0.419935		0.639402	0.615831		0.553323	0.424401
	0.607627	0.420755		0.931365	0.89946		0.45049	0.419935		0.640313	0.619217		0.555537	0.424401
	0.608669	0.421927		0.932276	0.89959		0.45098	0.420915		0.643438	0.619868		0.555928	0.425834
	0.611013	0.423359		0.933578	0.908054		0.452288	0.421242		0.647345	0.620259		0.560225	0.428699
	0.612315	0.424401		0.939829	0.908966		0.453268	0.421732		0.649429	0.62117		0.561658	0.429089
	0.613878	0.425052		0.941262	0.92303		0.454085	0.422549		0.65034	0.621691		0.56322	0.430391
	0.614529	0.428178		0.943866	0.924072		0.455719	0.423856		0.650991	0.622863		0.565304	0.431563
	0.61557	0.428308		0.943996	0.925504		0.458987	0.423856		0.65568	0.622863		0.568429	0.434819
	0.618175	0.429089		0.94595	0.928239		0.461438	0.425163		0.65581	0.622863		0.57455	0.43521
	0.619087	0.438726		0.952331	0.931104		0.461601	0.425163		0.659065	0.623644		0.57468	0.436121
	0.620389	0.439768		0.955977	0.935271		0.464216	0.426471		0.660237	0.624816		0.575201	0.438986
	0.621691	0.442893		0.956628	0.944126		0.464542	0.427124		0.664665	0.629504		0.579238	0.442763
	0.622733	0.443153		0.95806	0.951289		0.468627	0.427288		0.668181	0.632109		0.581452	0.443284
	0.622863	0.443284		0.962879	0.956888		0.468791	0.428431		0.670525	0.635104		0.581842	0.443674
	0.623514	0.443284		0.968739	0.960144		0.470425	0.429248		0.671958	0.63836		0.582754	0.445758
	0.623644	0.444325		0.972776	0.961186		0.471732	0.429575		0.67352	0.63836		0.585098	0.445888
	0.624686	0.4468		0.973167	0.962749		0.472876	0.429902		0.677297	0.642657		0.592	0.449274
	0.62716	0.448102		0.973167	0.971604		0.473693	0.430065		0.677687	0.647606		0.592	0.451097
	0.627421	0.448102		0.979287	0.972255		0.47451	0.431699		0.681204	0.649819		0.596297	0.451878
	0.628202	0.449014		0.984105	0.972255		0.476961	0.434641		0.68524	0.650861		0.597339	0.452009
	0.629895	0.449925		0.984236	0.973297		0.477288	0.439706		0.705686	0.651252		0.597339	0.45253
	0.630156	0.451227		0.986449	0.976422		0.477451	0.440033		0.714671	0.651643		0.600985	0.455915
	0.63289	0.452139		0.996346	0.978766		0.478268	0.44134		0.716625	0.662842		0.606845	0.45839
	0.634453	0.45279		0.9983	0.978896		0.478595	0.441503		0.717406	0.667921		0.613357	0.45852
	0.634844	0.453832		1.00546	0.983975		0.478922	0.441667		0.717927	0.671567		0.61518	0.45865
	0.635755	0.456697		1.00755	0.986059		0.482843	0.441993		0.718448	0.67352		0.615701	0.460083
	0.636537	0.457869		1.0082	0.994654		0.48317	0.44232		0.722224	0.679771		0.615831	0.460864
	0.637188	0.460604		1.00924	0.996607		0.483497	0.442484		0.723917	0.680683		0.615961	0.466594
	0.639402	0.462166		1.01432	0.997258		0.485458	0.443137		0.724308	0.684589		0.616352	0.467636
	0.641746	0.462427		1.01458	0.999993		0.485621	0.443137		0.726131	0.685631		0.617524	0.469719
	0.642006	0.463338		1.01653	1.00195		0.485784	0.443627		0.727954	0.687194		0.622472	0.471152
	0.643699	0.463599		1.02356	1.00247		0.486275	0.444444		0.734856	0.688366		0.622863	0.472063
	0.646955	0.463989		1.02474	1.00468		0.486438	0.445261		0.735507	0.688757		0.625077	0.472714
	0.647475	0.465031		1.02578	1.00768		0.487255	0.446242		0.735637	0.689147		0.625337	0.472845
	0.65008	0.469068		1.03385	1.00976		0.488072	0.44902		0.746837	0.689538		0.62664	0.474668
	0.650601	0.47037		1.03685	1.01002		0.490196	0.449346		0.747618	0.691621		0.62677	0.478835
	0.650861	0.474798		1.04114	1.01067		0.490523	0.449673		0.753608	0.695007		0.62716	0.479226
	0.652164	0.475319		1.04114	1.01145		0.491013	0.45		0.75439	0.697091		0.628332	0.479877
	0.655419	0.477402		1.04284	1.01328		0.491013	0.45049		0.755041	0.703732		0.628853	0.481179
	0.65581	0.477533		1.0431	1.01627		0.491667	0.450817		0.759208	0.704123		0.635234	0.482091
	0.658414	0.478314		1.0444	1.01744		0.493464	0.451961		0.759338	0.705946		0.636537	0.483132
	0.659717	0.478444		1.04557	1.01783		0.493464	0.453105		0.762333	0.706207		0.637578	0.486388
	0.659717	0.481439		1.05091	1.01992		0.494281	0.453105		0.763245	0.706988		0.637709	0.486779
	0.662191	0.484304		1.05117	1.02005		0.494444	0.453431		0.76624	0.70829		0.639271	0.489904
	0.664274	0.486388		1.0543	1.02122		0.494608	0.453431		0.769756	0.710244		0.639402	0.492248
	0.664925	0.491727		1.05716	1.02122		0.497712	0.455719		0.771579	0.710244		0.642787	0.492248
	0.668181	0.492248		1.06393	1.02252		0.498203	0.45719		0.771579	0.711806		0.643438	0.49329
	0.668311	0.492378		1.0655	1.02786		0.498366	0.457516		0.771579	0.712848		0.644871	0.493811
	0.670655	0.494722		1.06693	1.03541		0.498693	0.45768		0.773663	0.71376		0.645913	0.496025
	0.671306	0.494983		1.07136	1.0358		0.500163	0.459477		0.777309	0.714801		0.646434	0.497457
	0.671697	0.495764		1.07266	1.04127		0.502778	0.459477		0.779262	0.717276		0.648647	0.500582
	0.676646	0.49941		1.07305	1.04375		0.503758	0.459641		0.779914	0.717927		0.649689	0.501624
	0.679641	0.503057		1.07448	1.04492		0.503922	0.461111		0.787857	0.71962		0.650991	0.503838
	0.681594	0.503447		1.07604	1.04492		0.504412	0.462582		0.788118	0.720792		0.65581	0.504619
	0.682245	0.503968		1.07943	1.04635		0.504575	0.464542		0.793717	0.724438		0.658545	0.504619
	0.682766	0.504098		1.08242	1.04739		0.504902	0.465359		0.794108	0.73121		0.658935	0.50475
	0.683938	0.505531		1.08242	1.04765		0.505065	0.465359		0.797885	0.7372		0.6618	0.506052
	0.686282	0.505661		1.08255	1.06029		0.505229	0.465686		0.802833	0.743581		0.662061	0.507224
	0.687064	0.506052		1.08282	1.06029		0.505556	0.46585		0.802833	0.746446		0.662321	0.509959
	0.687454	0.506703		1.08295	1.06589		0.506699	0.466993		0.802833	0.746967		0.662581	0.509959
	0.687454	0.507745		1.08698	1.07175		0.507353	0.468137		0.803094	0.74879		0.664925	0.510219
	0.688105	0.507875		1.08946	1.07344		0.507353	0.468301		0.803614	0.750743		0.66753	0.511391
	0.688626	0.513735		1.09206	1.07604		0.507843	0.470425		0.804396	0.752306		0.670004	0.511521
	0.689668	0.517121		1.09336	1.07669		0.510131	0.471405		0.808693	0.752566		0.670134	0.511912
	0.69071	0.517121		1.09571	1.07787		0.511928	0.472222		0.810516	0.752827		0.670265	0.513344
	0.694747	0.521288		1.09792	1.07787		0.513072	0.472222		0.822106	0.755171		0.67339	0.516209
	0.697091	0.523241		1.09909	1.07995		0.513399	0.472222		0.823799	0.756083		0.673781	0.51686
	0.704383	0.525716		1.10131	1.08646		0.513562	0.473856		0.824971	0.759729		0.67925	0.520376
	0.705035	0.525846		1.10183	1.08868		0.514052	0.475327		0.824971	0.761422		0.681855	0.521418
	0.706597	0.525976		1.10365	1.08868		0.514542	0.476471		0.824971	0.76598		0.682115	0.521809
	0.707509	0.526497		1.10508	1.08972		0.516667	0.476797		0.825753	0.767933		0.686022	0.521939
	0.709072	0.526757		1.11225	1.09089		0.51683	0.478758		0.826013	0.773142		0.687585	0.523372
	0.711285	0.527929		1.11251	1.09128		0.51781	0.479248		0.828748	0.775226		0.688105	0.526367
	0.713369	0.529622		1.11355	1.09167		0.518954	0.480392		0.834217	0.777049		0.688236	0.526888
	0.713629	0.529753		1.11381	1.09284		0.519935	0.480719		0.834478	0.778481		0.688626	0.526888
	0.715843	0.530404		1.11654	1.09714		0.519935	0.48219		0.839687	0.778481		0.693835	0.530274
	0.716104	0.530664		1.12214	1.09753		0.520261	0.482516		0.840598	0.782127		0.694486	0.532357
	0.718578	0.530925		1.12579	1.11107		0.520915	0.483824		0.84164	0.782518		0.697351	0.533138
	0.71962	0.531706		1.128	1.11212		0.522876	0.484477		0.843463	0.784341		0.697742	0.533269
	0.720531	0.533399		1.13048	1.11238		0.524673	0.484804		0.846719	0.784341		0.697872	0.535482
	0.733163	0.535092		1.1323	1.11251		0.524837	0.485294		0.847891	0.786685		0.698654	0.543036
	0.734465	0.536264		1.13517	1.11368		0.525327	0.485294		0.848672	0.787727		0.700607	0.543817
	0.739804	0.536524		1.14337	1.11407		0.526471	0.486928		0.857137	0.789941		0.700737	0.544859
	0.739935	0.537696		1.14389	1.11446		0.526634	0.488072		0.85909	0.791373		0.7023	0.546291
	0.740456	0.537957		1.14623	1.11472		0.534314	0.490359		0.866513	0.791373		0.70256	0.546942
	0.741107	0.537957		1.14806	1.11589		0.535294	0.490686		0.868336	0.794368		0.703472	0.549156
	0.743451	0.538608		1.15066	1.11706		0.536111	0.49183		0.874847	0.797233		0.703732	0.550719
	0.746055	0.538738		1.15131	1.11876		0.537255	0.492484		0.883312	0.797364		0.704383	0.550979
	0.746837	0.540301		1.15691	1.12865		0.537745	0.492484		0.892688	0.797885		0.706467	0.550979
	0.747488	0.540561		1.16381	1.12905		0.539706	0.492647		0.898288	0.799057		0.70803	0.553844
	0.747878	0.541212		1.16954	1.13543		0.539869	0.493464		0.89972	0.800359		0.709072	0.55749
	0.748009	0.541994		1.17384	1.14064		0.539869	0.494281		0.902064	0.800749		0.710504	0.559834
	0.749311	0.544077		1.18439	1.14129		0.540033	0.494771		0.904669	0.807		0.710634	0.561397
	0.751264	0.545119		1.18726	1.14402		0.540196	0.495425		0.909747	0.80713		0.71376	0.561397
	0.753608	0.547463		1.1883	1.14597		0.540686	0.497222		0.910138	0.807521		0.714541	0.561788
	0.755041	0.547984		1.19207	1.14962		0.541993	0.499837		0.910789	0.807521		0.720141	0.562569
	0.755692	0.547984		1.19754	1.15079		0.542647	0.499837		0.910919	0.807912		0.723787	0.563481
	0.756083	0.548505		1.2008	1.1517		0.544281	0.500163		0.91105	0.808954		0.724698	0.565304
	0.757385	0.548505		1.20236	1.15353		0.545098	0.500327		0.911961	0.809865		0.724698	0.565825
	0.757385	0.549807		1.20523	1.1547		0.545915	0.50049		0.913133	0.811428		0.725219	0.567778
	0.757645	0.552802		1.20562	1.15717		0.54902	0.501144		0.915086	0.814032		0.728084	0.569211
	0.759338	0.553193		1.20731	1.15769		0.54951	0.501307		0.915998	0.815074		0.728345	0.573638
	0.759989	0.558662		1.20913	1.16225		0.550654	0.504085		0.919644	0.819762		0.728475	0.577936
	0.762203	0.558793		1.20991	1.16616		0.551797	0.504085		0.919905	0.825232		0.728735	0.581061
	0.764026	0.560095		1.21213	1.16785		0.551961	0.504575		0.923291	0.827055		0.730428	0.581973
	0.764287	0.561137		1.21408	1.16889		0.553105	0.505065		0.927458	0.827315		0.730428	0.583275
	0.764808	0.561267		1.21421	1.17085		0.553758	0.505065		0.929541	0.829399		0.730559	0.58627
	0.765719	0.561267		1.21721	1.18322		0.554085	0.505882		0.931625	0.830831		0.731991	0.588093
	0.767673	0.562699		1.2176	1.1883		0.554248	0.506046		0.933057	0.830962		0.739674	0.589916
	0.769886	0.56322		1.21903	1.19129		0.558987	0.506536		0.93462	0.834608		0.740065	0.59187
	0.769886	0.564392		1.22059	1.19259		0.560131	0.507026		0.939438	0.836691		0.741497	0.595386
	0.773272	0.565043		1.2245	1.19403		0.560294	0.508497		0.939699	0.840338		0.742018	0.595646
	0.773533	0.566215		1.2258	1.19468		0.560784	0.508824		0.94048	0.847109		0.743581	0.595907
	0.779653	0.566736		1.22684	1.19898		0.561111	0.508824		0.944257	0.852709		0.745144	0.596688
	0.780695	0.566736		1.22815	1.21135		0.563072	0.50915		0.946731	0.856486		0.745925	0.597209
	0.781737	0.56869		1.23348	1.21447		0.563562	0.509967		0.947903	0.860002		0.747227	0.600074
	0.785123	0.572076		1.23375	1.2176		0.564706	0.511765		0.95168	0.863518		0.748269	0.601116
	0.785774	0.572596		1.23531	1.22437		0.564706	0.512745		0.953893	0.865211		0.74879	0.602939
	0.787076	0.573899		1.23895	1.22815		0.56683	0.512908		0.956498	0.867034		0.749311	0.603981
	0.788118	0.57494		1.23948	1.22945		0.568301	0.514869		0.958451	0.867034		0.750353	0.604241
	0.78942	0.576243		1.23974	1.24273		0.570261	0.51634		0.959102	0.875108		0.750353	0.604762
	0.793327	0.576764		1.24013	1.25041		0.571405	0.518137		0.960925	0.878363		0.751655	0.609189
	0.794759	0.576894		1.24507	1.25185		0.571405	0.518137		0.965093	0.878493		0.752176	0.610622
	0.79528	0.579629		1.24924	1.25198		0.572059	0.518954		0.968739	0.881358		0.756603	0.611534
	0.797364	0.580801		1.25133	1.25237		0.572386	0.521078		0.96913	0.885135		0.756734	0.612575
	0.799057	0.582884		1.25523	1.2525		0.572876	0.527778		0.978375	0.886828		0.757255	0.613617
	0.800619	0.583145		1.26292	1.25367		0.573693	0.528105		0.981371	0.888		0.758427	0.614268
	0.800619	0.584056		1.26331	1.25927		0.574183	0.528268		0.981892	0.888651		0.758427	0.61505
	0.802703	0.585098		1.26995	1.26552		0.574346	0.528758		0.983454	0.891776		0.759989	0.617263
	0.803354	0.585358		1.27385	1.26917		0.576144	0.529248		0.983454	0.895162		0.761552	0.617654
	0.806219	0.585879		1.2762	1.27112		0.576634	0.530719		0.983975	0.895943		0.763636	0.617915
	0.807391	0.587702		1.27672	1.27503		0.577778	0.531209		0.98671	0.896074		0.764938	0.617915
	0.808172	0.587963		1.27763	1.28076		0.579412	0.531863		0.993221	0.897116		0.76598	0.617915
	0.809605	0.588093		1.27789	1.28792		0.579575	0.533333		0.993872	0.897767		0.767152	0.618045
	0.813902	0.590177		1.28388	1.29469		0.580229	0.534314		0.996737	0.89959		0.77197	0.618566
	0.817809	0.591088		1.28414	1.30211		0.581536	0.535131		0.998821	0.900892		0.773012	0.620519
	0.820153	0.593563		1.28961	1.30316		0.584314	0.537582		1.00051	0.902845		0.775226	0.620519
	0.826534	0.593953		1.29026	1.30823		0.585294	0.537745		1.00911	0.909877		0.775616	0.621951
	0.827055	0.594474		1.30198	1.30915		0.587418	0.538889		1.00924	0.912091		0.778351	0.622603
	0.829269	0.594604		1.30237	1.31149		0.589542	0.539542		1.0108	0.913784		0.779914	0.623644
	0.830962	0.594604		1.30342	1.31149		0.589706	0.539869		1.01119	0.916779		0.780434	0.625728
	0.833566	0.595646		1.30355	1.31331		0.590033	0.539869		1.01705	0.91704		0.782909	0.626379
	0.834478	0.596427		1.30381	1.31722		0.59281	0.540523		1.01848	0.917951		0.790332	0.627421
	0.835259	0.596948		1.3042	1.31943		0.594608	0.541176		1.02096	0.919384		0.792285	0.628723
	0.837343	0.59812		1.30954	1.31982		0.595752	0.541503		1.02447	0.92876		0.792676	0.628853
	0.837473	0.599162		1.31006	1.32126		0.599837	0.54232		1.02656	0.932667		0.792806	0.630546
	0.838645	0.599292		1.31097	1.32243		0.600163	0.544118		1.02656	0.932667		0.797233	0.631588
	0.838905	0.599423		1.31162	1.32308		0.603268	0.545752		1.02812	0.937745		0.803094	0.634062
	0.839426	0.602678		1.31383	1.32594		0.604248	0.546732		1.03086	0.938136		0.805047	0.635104
	0.843203	0.604762		1.31631	1.3305		0.605556	0.548203		1.03294	0.938136		0.80674	0.635885
	0.843854	0.605022		1.31891	1.33285		0.605882	0.54902		1.03567	0.939959		0.808042	0.636927
	0.846849	0.605413		1.31943	1.35485		0.608007	0.552451		1.03698	0.94035		0.810256	0.640313
	0.850756	0.608538		1.33753	1.35655		0.608824	0.552614		1.03932	0.942303		0.811819	0.641094
	0.852449	0.608799		1.33766	1.36306		0.610458	0.554412		1.04062	0.944126		0.817418	0.641485
	0.852709	0.611013		1.3391	1.36527		0.611765	0.556863		1.04075	0.952721		0.819502	0.641485
	0.854402	0.613487		1.34105	1.36592		0.611765	0.557843		1.04922	0.95806		0.819762	0.643308
	0.862866	0.614398		1.34912	1.3671		0.612092	0.557843		1.05638	0.962488		0.821064	0.645392
	0.865731	0.61505		1.35056	1.36788		0.612255	0.558497		1.05807	0.962749		0.823148	0.645783
	0.869247	0.61518		1.35069	1.37217		0.614706	0.559967		1.05859	0.964311		0.829529	0.645783
	0.871592	0.621561		1.35108	1.37348		0.615686	0.560458		1.05951	0.966265		0.83005	0.649429
	0.872243	0.622603		1.35264	1.37374		0.61683	0.562092		1.06615	0.966525		0.831222	0.65008
	0.874456	0.623514		1.35342	1.37543		0.617157	0.565359		1.06849	0.966655		0.832394	0.65034
	0.878493	0.623514		1.35381	1.37595		0.617974	0.566013		1.07201	0.966786		0.833436	0.650601
	0.880186	0.633411		1.36345	1.37908		0.619608	0.567484		1.07227	0.967306		0.833436	0.650601
	0.881098	0.633541		1.36592	1.38533		0.620588	0.567484		1.07565	0.973948		0.839035	0.651122
	0.882921	0.633672		1.36801	1.38819		0.623039	0.567647		1.07643	0.976422		0.839426	0.651382
	0.883312	0.633672		1.36853	1.38819		0.623203	0.56781		1.07904	0.980068		0.841379	0.655028
	0.883312	0.634062		1.36944	1.39236		0.624346	0.568627		1.07917	0.983194		0.84151	0.655289
	0.884354	0.634193		1.37322	1.39561		0.626634	0.569608		1.08269	0.984626		0.843724	0.655549
	0.889562	0.636537		1.37426	1.39627		0.626961	0.571732		1.08269	0.984756		0.848151	0.657372
	0.895943	0.639792		1.37491	1.40004		0.630065	0.574183		1.08412	0.990747		0.852709	0.657763
	0.898548	0.641876		1.37882	1.40095		0.630229	0.574346		1.08581	0.995174		0.85349	0.658024
	0.89985	0.642918		1.38051	1.40343		0.63268	0.575327		1.08633	0.999472		0.854793	0.658154
	0.89998	0.654377		1.38129	1.40799		0.638235	0.576634		1.08698	1.00781		0.855574	0.659847
	0.902064	0.655289		1.38233	1.41072		0.639052	0.580556		1.0892	1.02122		0.857397	0.66154
	0.903236	0.657112		1.38324	1.41502		0.639216	0.580882		1.08985	1.02708		0.85909	0.662712
	0.907924	0.657503		1.3891	1.4313		0.641176	0.581863		1.09115	1.02903		0.860002	0.663363
	0.912352	0.659065		1.3891	1.44796		0.642157	0.58317		1.09128	1.02929		0.860653	0.666749
	0.912873	0.660628		1.38988	1.45031		0.642647	0.583824		1.09662	1.02942		0.861825	0.671306
	0.91691	0.662712		1.39614	1.45044		0.645588	0.58415		1.09688	1.03255		0.862997	0.672218
	0.920165	0.663623		1.39913	1.45044		0.646242	0.584967		1.09766	1.03398		0.868336	0.672739
	0.921337	0.664535		1.40356	1.45552		0.648529	0.585294		1.10521	1.04075		0.868857	0.674302
	0.931625	0.666749		1.40447	1.47206		0.648529	0.585458		1.10665	1.05		0.87068	0.675083
	0.932667	0.671958		1.40629	1.47323		0.657026	0.586601		1.10704	1.05351		0.879405	0.675864
	0.93462	0.672739		1.41033	1.48		0.65866	0.588399		1.10743	1.05924		0.884223	0.676906
	0.937355	0.673781		1.41137	1.48091		0.658987	0.593137		1.10938	1.06302		0.887609	0.678078
	0.94022	0.674953		1.41502	1.48299		0.658987	0.594118		1.11016	1.06419		0.889823	0.678208
	0.942564	0.674953		1.41762	1.48352		0.660621	0.595588		1.11042	1.06497		0.891907	0.67938
	0.947903	0.677687		1.41801	1.48404		0.660784	0.596569		1.11433	1.0651		0.892558	0.681073
	0.95181	0.678078		1.41879	1.50474		0.661928	0.597059		1.11811	1.06927		0.895162	0.682766
	0.959363	0.678078		1.42179	1.50539		0.663889	0.597712		1.11824	1.07539		0.898418	0.683548
	0.960795	0.679641		1.42518	1.50552		0.665196	0.600327		1.11941	1.07865		0.898808	0.68524
	0.971734	0.681073		1.42856	1.5067		0.666503	0.602288		1.1198	1.08008		0.90532	0.686022
	0.975641	0.68511		1.43195	1.50891		0.668464	0.604248		1.12214	1.08373		0.908575	0.688366
	0.983715	0.685761		1.43703	1.5119		0.669608	0.605719		1.13139	1.08776		0.911961	0.688757
	0.984366	0.686282		1.44653	1.51607		0.669771	0.605882		1.13386	1.10105		0.912091	0.689538
	0.985277	0.686803		1.45109	1.51789		0.670098	0.606046		1.13569	1.10144		0.912873	0.690189
	1.00507	0.687454		1.45213	1.51933		0.671242	0.606209		1.13868	1.10508		0.912873	0.691101
	1.00611	0.691361		1.45395	1.52415		0.671732	0.60768		1.14402	1.10639		0.913003	0.692273
	1.01484	0.693184		1.45981	1.52935		0.672222	0.607843		1.15014	1.10912		0.918212	0.69657
	1.02031	0.694356		1.4843	1.52948		0.672712	0.616176		1.15014	1.11824		0.918603	0.697351
	1.02044	0.694877		1.48573	1.54407		0.677778	0.616503		1.15613	1.12227		0.918733	0.699695
	1.02747	0.694877		1.50227	1.54641		0.686438	0.619771		1.16329	1.12605		0.920686	0.700998
	1.03255	0.695398		1.50253	1.55201		0.686601	0.621895		1.17007	1.12852		0.920686	0.70217
	1.03268	0.696179		1.50826	1.56412		0.687582	0.622222		1.17085	1.1353		0.923811	0.705816
	1.0358	0.69683		1.51607	1.5709		0.689379	0.622712		1.18022	1.13803		0.926025	0.706076
	1.03945	0.697351		1.51763	1.57259		0.69085	0.624673		1.18205	1.14024		0.926416	0.709983
	1.04492	0.698393		1.53131	1.57337		0.692484	0.626471		1.18283	1.14246		0.932667	0.710113
	1.04648	0.698393		1.54081	1.57428		0.692484	0.626797		1.18348	1.15392		0.933839	0.715713
	1.04935	0.699956		1.54264	1.57806		0.692647	0.627124		1.1883	1.1547		0.93436	0.715843
	1.05195	0.702039		1.55449	1.58092		0.69281	0.627288		1.19142	1.15613		0.93462	0.715973
	1.05234	0.707509		1.56191	1.58184		0.693301	0.627288		1.19715	1.16212		0.936053	0.718187
	1.05625	0.709723		1.57142	1.58392		0.693464	0.630556		1.20145	1.16486		0.943736	0.719229
	1.0655	0.712588		1.57754	1.58405		0.695588	0.631699		1.20301	1.16486		0.944517	0.72001
	1.0668	0.71389		1.57936	1.58509		0.697549	0.632353		1.21044	1.16577		0.945168	0.720271
	1.0806	0.718838		1.5804	1.58613		0.697712	0.633333		1.21239	1.16811		0.94634	0.721703
	1.08229	0.72001		1.59017	1.58822		0.698039	0.635294		1.21252	1.17163		0.946991	0.722615
	1.08425	0.720271		1.59512	1.58965		0.7	0.636765		1.22229	1.181		0.947903	0.728215
	1.09245	0.722875		1.59642	1.59134		0.701471	0.639379		1.2258	1.18205		0.948294	0.728735
	1.10495	0.724568		1.60814	1.59929		0.701634	0.641993		1.22776	1.18322		0.956237	0.731079
	1.11615	0.724829		1.61335	1.59942		0.707026	0.64232		1.23088	1.18452		0.959884	0.736549
	1.11902	0.72535		1.62872	1.60293		0.708007	0.643627		1.23752	1.18478		0.960274	0.739284
	1.12305	0.72561		1.63054	1.60775		0.708497	0.645261		1.23961	1.18895		0.960665	0.740065
	1.12345	0.727043		1.63783	1.61048		0.708824	0.648529		1.25159	1.19259		0.967046	0.740586
	1.12826	0.730038		1.63874	1.61218		0.717974	0.648856		1.25614	1.19819		0.967567	0.742018
	1.13321	0.737851		1.6407	1.61387		0.720915	0.64902		1.25862	1.20015		0.968218	0.7428
	1.13998	0.739935		1.64656	1.61517		0.721895	0.649183		1.2594	1.20601		0.971343	0.74293
	1.14259	0.741237		1.65203	1.61608		0.723203	0.650817		1.26617	1.21135		0.971474	0.743451
	1.16408	0.7428		1.65502	1.61778		0.72451	0.653595		1.26643	1.21148		0.975511	0.744362
	1.17111	0.745013		1.6558	1.61908		0.733497	0.653758		1.26747	1.21252		0.978245	0.751655
	1.17267	0.746446		1.66869	1.6226		0.735131	0.655556		1.26995	1.21682		0.98085	0.753608
	1.1741	0.755562		1.67	1.62806		0.735458	0.660458		1.27698	1.21916		0.982282	0.757124
	1.17853	0.756083		1.67143	1.63002		0.737745	0.661438		1.27867	1.22203		0.983454	0.757515
	1.17905	0.756734		1.68419	1.6321		0.742157	0.663235		1.29078	1.2245		0.983975	0.759859
	1.17996	0.759468		1.69214	1.64018		0.743464	0.669118		1.29078	1.22802		0.988012	0.763636
	1.18608	0.762724		1.69943	1.65606		0.743627	0.669771		1.2943	1.22971		0.988924	0.764287
	1.19312	0.764417		1.70164	1.65763		0.746569	0.672386		1.29664	1.23531		0.991658	0.766891
	1.19416	0.764547		1.70724	1.65763		0.747549	0.674183		1.30003	1.23622		0.994784	0.767282
	1.19898	0.765068		1.71349	1.65854		0.749673	0.676144		1.30094	1.23961		0.997518	0.771449
	1.20718	0.771709		1.71779	1.67325		0.752778	0.678431		1.30941	1.25354		1.01835	0.772491
	1.21421	0.78356		1.72508	1.67599		0.756209	0.679085		1.3111	1.2568		1.01875	0.773272
	1.21603	0.784992		1.73784	1.67638		0.75768	0.680065		1.31123	1.25888		1.02005	0.773923
	1.22046	0.788508		1.73849	1.68107		0.75768	0.681536		1.32959	1.26552		1.02461	0.777309
	1.2245	0.792155		1.73849	1.68211		0.769608	0.68268		1.33298	1.2749		1.02864	0.779783
	1.24481	0.792415		1.74501	1.68732		0.77598	0.685131		1.33467	1.27854		1.03007	0.780955
	1.24846	0.798145		1.74683	1.698		0.776144	0.685458		1.33701	1.28831		1.03203	0.781476
	1.25289	0.799187		1.7674	1.70112		0.778431	0.685948		1.34938	1.28987		1.03424	0.789029
	1.26187	0.800098		1.77444	1.70164		0.778595	0.687908		1.35082	1.29078		1.0362	0.78968
	1.27021	0.803354		1.7773	1.70711		0.778922	0.688399		1.3529	1.3055		1.03659	0.791373
	1.27255	0.807912		1.7786	1.7131		0.779739	0.688725		1.35433	1.30771		1.03698	0.793848
	1.27776	0.808433		1.79345	1.71466		0.781536	0.689052		1.35472	1.30875		1.03711	0.795801
	1.27841	0.810777		1.79644	1.71662		0.791667	0.689706		1.35485	1.31448		1.0375	0.798926
	1.28154	0.811819		1.80491	1.71818		0.799837	0.690196		1.35928	1.32594		1.04101	0.801531
	1.29143	0.815725		1.80686	1.7424		0.8	0.690523		1.36293	1.32751		1.05807	0.801922
	1.30719	0.821325		1.81051	1.75516		0.805719	0.695752		1.3796	1.3318		1.06185	0.802052
	1.31175	0.821455		1.81806	1.75647		0.807353	0.697712		1.38507	1.33636		1.06641	0.805177
	1.32803	0.826013		1.82184	1.77665		0.809804	0.699837		1.38741	1.35004		1.07149	0.808302
	1.33363	0.827315		1.82887	1.77952		0.812255	0.704575		1.38806	1.35056		1.07396	0.808954
	1.33558	0.828878		1.82965	1.79098		0.814379	0.705065		1.40004	1.36058		1.07982	0.811819
	1.33858	0.829138		1.83525	1.79163		0.824837	0.709641		1.40187	1.38025		1.09232	0.813772
	1.33897	0.831222		1.83734	1.79397		0.826307	0.710621		1.40851	1.396		1.09271	0.816376
	1.37556	0.83604		1.8432	1.79736		0.828268	0.711111		1.41098	1.39796		1.10196	0.81833
	1.3779	0.838905		1.84593	1.80061		0.832026	0.717157		1.41098	1.41137		1.10834	0.818851
	1.3809	0.844375		1.84619	1.80387		0.838235	0.717484		1.41424	1.41228		1.10925	0.820674
	1.38285	0.848151		1.86403	1.80452		0.840033	0.719608		1.41437	1.4201		1.11055	0.821455
	1.40134	0.850365		1.87041	1.81025		0.847876	0.720261		1.41918	1.42023		1.11212	0.827966
	1.40278	0.857397		1.87119	1.81116		0.851307	0.723039		1.41945	1.42986		1.11602	0.828617
	1.40421	0.860132		1.87679	1.81168		0.851471	0.726634		1.42023	1.43051		1.11863	0.828617
	1.43585	0.863387		1.91495	1.8135		0.865523	0.727941		1.42114	1.43064		1.11928	0.828748
	1.45565	0.867945		1.92406	1.83525		0.866176	0.733007		1.42153	1.43507		1.11928	0.829269
	1.47753	0.87042		1.9337	1.84359		0.868627	0.73317		1.45708	1.43833		1.11941	0.829399
	1.49862	0.871722		1.93696	1.8471		0.87402	0.735294		1.45851	1.44471		1.12462	0.832264
	1.52219	0.873284		1.97016	1.86221		0.874183	0.736111		1.46945	1.45786		1.12553	0.833045
	1.54068	0.878493		1.98045	1.86403		0.877778	0.74134		1.47323	1.45981		1.13035	0.840077
	1.54798	0.88826		2.02811	1.86468		0.893137	0.747386		1.48299	1.46372		1.13543	0.840859
	1.55644	0.888651		2.03697	1.86664		0.895588	0.752614		1.49289	1.48273		1.13816	0.843463
	1.57936	0.907273		2.04101	1.87158		0.897059	0.752778		1.49328	1.48273		1.13907	0.844505
	1.58288	0.908315		2.05025	1.87823		0.906536	0.755392		1.49784	1.48378		1.14663	0.849844
	1.60983	0.915998		2.05611	1.882		0.91781	0.756373		1.5067	1.48651		1.15444	0.853621
	1.61739	0.9173		2.06301	1.88448		0.931536	0.759641		1.50735	1.49914		1.159	0.854793
	1.62559	0.920035		2.06705	1.88487		0.93317	0.761111		1.50995	1.50188		1.16225	0.861694
	1.62754	0.920816		2.07434	1.88851		0.939379	0.770425		1.51646	1.50188		1.16629	0.864039
	1.64656	0.932667		2.08919	1.89047		0.949673	0.775163		1.51789	1.50591		1.16707	0.865341
	1.66453	0.94022		2.10013	1.89476		0.95	0.784641		1.52584	1.52506		1.16889	0.867294
	1.66713	0.942824		2.10286	1.89724		0.954412	0.784967		1.52675	1.54602		1.19246	0.868075
	1.67039	0.946731		2.10573	1.9057		0.964869	0.788235		1.52779	1.5485		1.19676	0.87094
	1.67625	0.947512		2.11354	1.94646		0.990196	0.790033		1.53001	1.56126		1.21695	0.874847
	1.68549	0.948684		2.13737	1.94894		0.993301	0.794608		1.53847	1.56855		1.22098	0.877973
	1.69643	0.95207		2.15821	1.95506		0.994118	0.797549		1.54394	1.58249		1.22268	0.880707
	1.70281	0.959233		2.16329	1.96496		1.01405	0.801797		1.54785	1.59772		1.22502	0.882661
	1.72612	0.961186		2.18126	1.96977		1.01667	0.804575		1.56256	1.59811		1.22906	0.883833
	1.73381	0.961316		2.19558	1.9742		1.02173	0.806699		1.5692	1.61244		1.22906	0.884614
	1.73537	0.961837		2.19962	1.97941		1.025	0.807026		1.57064	1.62416		1.23114	0.885135
	1.73836	0.971343		2.21329	1.98827		1.03056	0.80768		1.57233	1.63067		1.23179	0.896204
	1.74188	0.973427		2.21381	1.98918		1.03529	0.811438		1.57259	1.6433		1.23739	0.896725
	1.75881	0.975901		2.23035	1.99608		1.03644	0.812255		1.57611	1.64994		1.24052	0.897636
	1.7592	0.975901		2.23582	2.00441		1.04853	0.827288		1.57819	1.65619		1.24716	0.906752
	1.76832	0.990356		2.24129	2.00949		1.04902	0.828922		1.58874	1.65737		1.25094	0.908445
	1.77405	1.00716		2.24416	2.01105		1.05882	0.84183		1.59538	1.65932		1.25575	0.926546
	1.79931	1.01458		2.25093	2.01301		1.06454	0.843954		1.60007	1.66804		1.25823	0.929802
	1.80751	1.02617		2.25327	2.01379		1.08301	0.849346		1.60983	1.68419		1.25901	0.938266
	1.80947	1.02825		2.26096	2.01535		1.10964	0.851307		1.6114	1.6851		1.25966	0.94048
	1.81767	1.02968		2.26538	2.0216		1.11928	0.856536		1.62312	1.68654		1.26318	0.946601
	1.81962	1.03346		2.29364	2.02238		1.13775	0.858333		1.62702	1.69083		1.26448	0.948424
	1.82132	1.03476		2.30471	2.03749		1.14984	0.862745		1.65606	1.69344		1.26982	0.952852
	1.82132	1.04114		2.31799	2.04595		1.15637	0.869608		1.6588	1.71675		1.27268	0.956888
	1.82562	1.04284		2.343	2.05247		1.16454	0.876307		1.66127	1.71883		1.27724	0.964441
	1.82965	1.04609		2.37868	2.0677		1.18954	0.888072		1.66505	1.72404		1.34509	0.964572
	1.83812	1.04622		2.39678	2.06861		1.20359	0.888562		1.67143	1.72938		1.35251	0.965614
	1.8458	1.05117		2.40264	2.06953		1.20507	0.890523		1.67664	1.73303		1.36683	0.97512
	1.85114	1.05755		2.43493	2.09049		1.21078	0.894771		1.69318	1.7661		1.38507	0.980459
	1.85934	1.07044		2.45538	2.09114		1.22402	0.90049		1.72469	1.8208		1.38585	0.981501
	1.86351	1.07552		2.46411	2.09388		1.23007	0.900654		1.73172	1.87354		1.39288	0.983975
	1.86455	1.07669		2.47908	2.09427		1.23987	0.906046		1.73237	1.8889		1.40512	0.985538
	1.86677	1.10352		2.50617	2.10104		1.2835	0.911111		1.73368	1.89216		1.40733	0.990226
	1.87888	1.11029		2.53495	2.10638		1.33186	0.911275		1.74618	1.90115		1.40799	0.991658
	1.90922	1.11277		2.55982	2.11979		1.3433	0.928758		1.76089	1.90544		1.41306	0.993742
	1.91547	1.13438		2.56529	2.12409		1.39722	0.939542		1.76949	1.91013		1.42309	0.995174
	1.94711	1.13972		2.60123	2.1405		1.4134	0.945752		1.77522	1.93435		1.42557	0.997128
	1.96053	1.15392		2.60592	2.15248		1.4152	0.949346		1.7803	1.93565		1.4645	0.99817
	1.98345	1.15717		2.62389	2.18048		1.42435	0.957516		1.79671	1.96287		1.46581	1.00455
	1.98644	1.184		2.64277	2.18373		1.45458	0.975817		1.804	1.97668		1.47583	1.01666
	1.99517	1.19598		2.6558	2.18868		1.51601	0.99183		1.80478	1.98201		1.4787	1.02317
	1.99673	1.19715		2.69434	2.19519		1.54265	0.992157		1.81559	2.01496		1.48964	1.02604
	2.00689	1.20705		2.74435	2.2254		1.55833	0.995915		1.82002	2.01991		1.49888	1.03685
	2.02863	1.21343		2.76597	2.234		1.60784	0.997386		1.82783	2.05781		1.50409	1.06419
	2.04791	1.21799		2.82977	2.24272		1.65784	1.0098		1.83265	2.07083		1.53157	1.06471
	2.08437	1.23401		2.85504	2.24702		1.72451	1.01111		1.83382	2.08151		1.53899	1.07735
	2.13438	1.24911		2.87314	2.2478			1.04641		1.85244	2.10234		1.54589	1.08972
	2.16602	1.27216		2.87418	2.26486			1.05882		1.85843	2.10273		1.5498	1.10639
	2.16954	1.28024		2.87744	2.26538			1.07206		1.87158	2.12591		1.55761	1.10912
	2.2073	1.2805		2.89697	2.28179			1.07337		1.8725	2.16394		1.66375	1.11159
	2.22072	1.28831		2.9001	2.30041			1.07663		1.91234	2.23934		1.66948	1.11876
	2.26981	1.29391		2.98722	2.34508			1.08203		1.91847	2.27098		1.69904	1.12019
	2.28179	1.37361		3.00128	2.35211			1.17239		1.97655	2.28986		1.70672	1.12175
	2.32711	1.40291		3.1319	2.38962			1.17941		2.01757	2.32346		1.75907	1.14337
	2.33701	1.43442		3.54393	2.45811			1.18105		2.04491	2.32476		1.76754	1.1465
	2.3512	1.48872		3.61568	2.49406			1.18709		2.10937	2.34938		1.77066	1.17905
	2.3667	1.57233		3.6873	2.54563			1.21716		2.12539	2.34964		1.78915	1.18192
	2.39235	1.5929		4.0966	2.58248			1.29395		2.13698	2.36071		1.8109	1.20926
	2.47609	1.66635		4.22461	2.63795			1.30948		2.13815	2.37373		1.81155	1.22059
	2.52583	1.72078		4.30209	2.74487			1.3232		2.15899	2.4602		1.81689	1.24065
	2.60032	1.83838		4.31342	2.77677			1.32402		2.27398	2.69174		1.82444	1.29209
	2.90387	1.87276		4.37059	2.81115			1.33758		2.38128	2.77951		1.83187	1.35342
	2.91195	2.11628		4.53324	2.8928			1.36454		2.60839	2.91025		1.87914	1.41658
	3.06366			4.62817	3.03071			1.6201		2.95779	3.94319		2.00545	1.48521
	3.2827			5.37918	3.07186			1.72173					2.07682	1.50409

## Sheet: Panel C
Budding volumes (r.u.) in newly-born cells
	wt
	empty	CHS YAC
mean	1	0.79541
sd	0.343707	0.37048
N	250	250
CL(0.05)	0.0426055	0.0443553
	0.406466	0.267083
	0.458468	0.329781
	0.474265	0.332578
	0.478873	0.386554
	0.485291	0.420619
	0.490886	0.442176
	0.495988	0.445303
	0.503064	0.445467
	0.510798	0.446126
	0.512937	0.452708
	0.520507	0.452873
	0.52495	0.45567
	0.526761	0.458468
	0.533508	0.460442
	0.534001	0.462088
	0.536305	0.467518
	0.538773	0.469493
	0.541736	0.469658
	0.54552	0.479367
	0.548483	0.479861
	0.55128	0.490063
	0.552597	0.491709
	0.557533	0.495658
	0.56247	0.500266
	0.563129	0.508659
	0.563458	0.509317
	0.56642	0.509646
	0.567572	0.512937
	0.567736	0.513925
	0.569546	0.51557
	0.575635	0.516229
	0.576623	0.516393
	0.577116	0.516558
	0.577281	0.518697
	0.579585	0.519026
	0.581559	0.521165
	0.582711	0.522646
	0.58304	0.524786
	0.58518	0.525279
	0.587154	0.527254
	0.592585	0.529558
	0.592914	0.532849
	0.595053	0.533343
	0.596534	0.533343
	0.597193	0.542394
	0.597522	0.542723
	0.598016	0.543381
	0.59818	0.544204
	0.601965	0.544533
	0.602459	0.544698
	0.604763	0.547002
	0.605256	0.54766
	0.605421	0.548483
	0.605585	0.549635
	0.60575	0.549799
	0.605914	0.549964
	0.606902	0.550128
	0.607396	0.550128
	0.609535	0.550786
	0.612661	0.552432
	0.614801	0.552597
	0.61513	0.552597
	0.616117	0.557369
	0.619738	0.560002
	0.620067	0.56066
	0.620067	0.560825
	0.621054	0.561647
	0.62451	0.561647
	0.626978	0.561647
	0.629611	0.561812
	0.62994	0.563951
	0.630599	0.568395
	0.632738	0.568724
	0.633232	0.569382
	0.636194	0.570534
	0.636852	0.570534
	0.639156	0.570698
	0.640143	0.572344
	0.643599	0.57366
	0.646561	0.57399
	0.647548	0.575964
	0.647878	0.581395
	0.648371	0.584028
	0.649523	0.584686
	0.651662	0.585344
	0.652979	0.587813
	0.653144	0.588471
	0.653144	0.589294
	0.653966	0.59275
	0.654295	0.594066
	0.654954	0.597686
	0.657093	0.599661
	0.657751	0.600319
	0.659726	0.600484
	0.66022	0.600978
	0.662853	0.602294
	0.663182	0.603281
	0.664663	0.603446
	0.664992	0.603611
	0.66565	0.604433
	0.667296	0.604927
	0.66746	0.605421
	0.668283	0.605585
	0.668612	0.60756
	0.668612	0.608054
	0.6696	0.608218
	0.670258	0.608218
	0.670258	0.609206
	0.670258	0.60937
	0.670916	0.610028
	0.670916	0.610028
	0.671574	0.610358
	0.671574	0.610851
	0.671574	0.610851
	0.673385	0.611016
	0.673549	0.612003
	0.675359	0.615294
	0.675853	0.616117
	0.679967	0.616282
	0.681119	0.616446
	0.682271	0.616446
	0.682435	0.617598
	0.6826	0.619244
	0.6826	0.619738
	0.683423	0.619902
	0.683423	0.620725
	0.684575	0.620725
	0.684739	0.62089
	0.685068	0.621712
	0.685562	0.622371
	0.689018	0.623029
	0.689182	0.623523
	0.690334	0.623687
	0.690334	0.624345
	0.690663	0.624674
	0.690993	0.625497
	0.691322	0.626155
	0.693296	0.627307
	0.694942	0.628459
	0.695271	0.629118
	0.696917	0.629282
	0.696917	0.629611
	0.697081	0.629611
	0.69774	0.630763
	0.698398	0.630763
	0.698398	0.631751
	0.699056	0.634384
	0.699714	0.634384
	0.699714	0.634877
	0.700373	0.636358
	0.702183	0.637675
	0.702676	0.637675
	0.703006	0.638333
	0.703499	0.638498
	0.704158	0.638498
	0.704322	0.638662
	0.705145	0.63932
	0.705309	0.640143
	0.706132	0.640801
	0.706297	0.640966
	0.707449	0.641295
	0.708601	0.641624
	0.711234	0.641953
	0.712056	0.642447
	0.712221	0.643434
	0.713044	0.643599
	0.714196	0.644093
	0.714196	0.644093
	0.714689	0.644422
	0.714689	0.645903
	0.7165	0.645903
	0.716829	0.646067
	0.719462	0.646397
	0.720614	0.647219
	0.720943	0.647384
	0.722588	0.649194
	0.723411	0.649359
	0.72374	0.649523
	0.723905	0.651498
	0.724234	0.652156
	0.724892	0.652156
	0.725057	0.653802
	0.725386	0.655283
	0.72555	0.655777
	0.726044	0.656106
	0.726867	0.656106
	0.727361	0.65627
	0.729335	0.656928
	0.731804	0.658574
	0.73312	0.658574
	0.733449	0.658739
	0.733449	0.658903
	0.734272	0.658903
	0.735918	0.659561
	0.738386	0.659726
	0.740032	0.659891
	0.741019	0.66022
	0.743488	0.663017
	0.743652	0.663182
	0.743981	0.664005
	0.744475	0.665157
	0.745133	0.66565
	0.746121	0.666802
	0.74645	0.668119
	0.74645	0.669929
	0.74645	0.670093
	0.746779	0.670422
	0.749741	0.670916
	0.751222	0.670916
	0.752045	0.671245
	0.752868	0.671574
	0.753526	0.671739
	0.755665	0.672068
	0.756159	0.672562
	0.756982	0.673714
	0.756982	0.674536
	0.758956	0.675359
	0.760273	0.676018
	0.760437	0.676018
	0.760767	0.67684
	0.762083	0.678321
	0.762412	0.679802
	0.762577	0.680625
	0.762741	0.681613
	0.764716	0.681777
	0.764716	0.681942
	0.76521	0.683423
	0.765374	0.68441
	0.766526	0.684904
	0.767184	0.686056
	0.767843	0.686549
	0.768172	0.686714
	0.768336	0.686879
	0.768666	0.687043
	0.768995	0.687208
	0.774425	0.687537
	0.777387	0.687537
	0.778046	0.68836
	0.778046	0.688524
	0.778375	0.688689
	0.779197	0.689018
	0.78002	0.690499
	0.78002	0.690828
	0.780514	0.691322
	0.781172	0.692309
	0.781666	0.692638
	0.784463	0.693296
	0.786109	0.69379
	0.786274	0.694119
	0.786767	0.695929
	0.786932	0.696094
	0.786932	0.696752
	0.787919	0.698069
	0.788413	0.699056
	0.789071	0.700043
	0.789565	0.700373
	0.790552	0.700537
	0.790881	0.702018
	0.791046	0.702183
	0.791704	0.702841
	0.792362	0.703335
	0.792691	0.703499
	0.793514	0.704322
	0.793679	0.70498
	0.793679	0.705639
	0.794995	0.706461
	0.795654	0.707284
	0.796476	0.709753
	0.796641	0.710575
	0.796805	0.71074
	0.797628	0.711069
	0.798122	0.712386
	0.798122	0.712879
	0.79878	0.713373
	0.799274	0.715183
	0.800097	0.717158
	0.800426	0.717816
	0.800426	0.718145
	0.80059	0.719133
	0.80059	0.719462
	0.802401	0.719626
	0.804375	0.719791
	0.80454	0.720449
	0.805363	0.720614
	0.805527	0.720778
	0.807667	0.720778
	0.808983	0.720778
	0.810464	0.721272
	0.810629	0.721766
	0.810958	0.722095
	0.811287	0.722917
	0.812439	0.723576
	0.812603	0.724069
	0.812768	0.724069
	0.814084	0.724563
	0.815565	0.726538
	0.816224	0.726867
	0.817376	0.729006
	0.81754	0.7295
	0.818198	0.730158
	0.818363	0.730487
	0.820502	0.73131
	0.821325	0.731475
	0.823464	0.732133
	0.823464	0.732297
	0.823794	0.733614
	0.824452	0.73493
	0.824616	0.735589
	0.824616	0.735753
	0.825933	0.736412
	0.826097	0.736905
	0.82873	0.737234
	0.828895	0.737563
	0.829553	0.737563
	0.83087	0.737893
	0.831199	0.737893
	0.833009	0.73888
	0.835642	0.739538
	0.8363	0.741184
	0.8363	0.741842
	0.837452	0.743817
	0.837781	0.74464
	0.83811	0.744969
	0.839098	0.748424
	0.839756	0.748589
	0.839921	0.749576
	0.840414	0.750399
	0.840579	0.753526
	0.840908	0.753855
	0.841237	0.754678
	0.843047	0.755665
	0.843047	0.75583
	0.845516	0.756323
	0.84568	0.756488
	0.846009	0.757146
	0.846997	0.757311
	0.847326	0.757804
	0.848149	0.759286
	0.848807	0.760108
	0.848971	0.760273
	0.849136	0.760437
	0.849465	0.761589
	0.850123	0.761754
	0.850782	0.762248
	0.852921	0.762248
	0.853415	0.762906
	0.854896	0.763729
	0.856048	0.763893
	0.857035	0.764222
	0.857199	0.764551
	0.857693	0.766691
	0.858516	0.76702
	0.859668	0.767514
	0.860326	0.769324
	0.86082	0.769653
	0.862465	0.771628
	0.862465	0.773931
	0.864276	0.774096
	0.864605	0.774261
	0.865263	0.775248
	0.865592	0.775742
	0.867402	0.777058
	0.872833	0.778868
	0.875137	0.779362
	0.875795	0.779856
	0.876453	0.781337
	0.876947	0.781501
	0.87744	0.783147
	0.881061	0.784957
	0.88139	0.785286
	0.882706	0.785944
	0.8832	0.785944
	0.883529	0.786274
	0.884023	0.786767
	0.884023	0.787261
	0.884681	0.788413
	0.88501	0.788742
	0.885175	0.790058
	0.886162	0.790388
	0.888631	0.790552
	0.88896	0.790717
	0.890276	0.792198
	0.890935	0.792362
	0.891757	0.792362
	0.894555	0.792691
	0.894719	0.793843
	0.896365	0.794173
	0.898833	0.794666
	0.900315	0.794666
	0.903441	0.794831
	0.903606	0.794995
	0.90377	0.795489
	0.904099	0.795983
	0.904758	0.796476
	0.90558	0.796476
	0.905745	0.796641
	0.907062	0.797793
	0.907555	0.79878
	0.90772	0.799109
	0.908378	0.799932
	0.908872	0.801249
	0.909694	0.801742
	0.910682	0.802071
	0.911505	0.80273
	0.914138	0.80273
	0.914467	0.804211
	0.914631	0.805198
	0.915454	0.805527
	0.915454	0.805856
	0.915619	0.806679
	0.915783	0.806679
	0.917923	0.809148
	0.918416	0.809148
	0.919733	0.809641
	0.922037	0.810135
	0.922201	0.811287
	0.924999	0.813262
	0.925163	0.813591
	0.926809	0.815072
	0.927467	0.815565
	0.927632	0.816388
	0.930429	0.816553
	0.931087	0.817211
	0.937176	0.817705
	0.938822	0.818034
	0.93948	0.818198
	0.940303	0.818363
	0.940303	0.818857
	0.940961	0.819021
	0.941126	0.820173
	0.942113	0.822477
	0.942113	0.822642
	0.942278	0.8233
	0.942607	0.823629
	0.943923	0.824123
	0.946392	0.82692
	0.946392	0.828072
	0.949847	0.828566
	0.951328	0.829389
	0.952316	0.829718
	0.957582	0.830047
	0.958569	0.83087
	0.958898	0.831199
	0.959557	0.831199
	0.962519	0.831857
	0.962683	0.832351
	0.962848	0.83268
	0.964823	0.832844
	0.969266	0.833338
	0.969924	0.833338
	0.970911	0.833996
	0.971076	0.834161
	0.97881	0.835642
	0.979962	0.835971
	0.982595	0.836465
	0.984405	0.836629
	0.984734	0.836629
	0.988519	0.837781
	0.991152	0.837781
	0.992962	0.838604
	0.993127	0.838769
	0.995102	0.839262
	0.997899	0.839921
	0.999216	0.841895
	0.999874	0.84206
	1.00284	0.84206
	1.00448	0.84206
	1.00662	0.842718
	1.00761	0.842883
	1.00761	0.843212
	1.00975	0.844199
	1.01238	0.84568
	1.01567	0.845845
	1.01798	0.846009
	1.01913	0.846832
	1.01929	0.847984
	1.02127	0.848642
	1.02143	0.84963
	1.02884	0.850288
	1.029	0.851111
	1.02982	0.851275
	1.03015	0.85144
	1.03098	0.851769
	1.03147	0.851769
	1.03706	0.852427
	1.03855	0.852756
	1.03888	0.853085
	1.0392	0.854073
	1.03986	0.855389
	1.04266	0.856048
	1.04365	0.85687
	1.04447	0.858022
	1.04579	0.861807
	1.04644	0.862795
	1.0476	0.862795
	1.04826	0.863782
	1.05138	0.864605
	1.05681	0.864934
	1.06142	0.865263
	1.06158	0.865428
	1.06356	0.865592
	1.06504	0.866744
	1.06504	0.867896
	1.0657	0.869048
	1.06817	0.869048
	1.06915	0.869542
	1.06965	0.870858
	1.07212	0.872997
	1.07245	0.87382
	1.07343	0.874643
	1.07376	0.87563
	1.07722	0.876124
	1.07886	0.876947
	1.08314	0.87744
	1.09088	0.877605
	1.09104	0.877605
	1.09302	0.878099
	1.09548	0.878428
	1.09746	0.881061
	1.0996	0.881225
	1.10388	0.882377
	1.10536	0.883365
	1.10651	0.886656
	1.10651	0.88682
	1.10717	0.888302
	1.11161	0.888631
	1.11227	0.889453
	1.11424	0.889947
	1.11474	0.890935
	1.11474	0.891922
	1.11556	0.892909
	1.11852	0.89439
	1.12033	0.89439
	1.12362	0.894719
	1.1284	0.895378
	1.1284	0.895707
	1.12905	0.895707
	1.13037	0.896365
	1.13416	0.899492
	1.13745	0.899656
	1.13778	0.900315
	1.13893	0.900479
	1.14584	0.900644
	1.14847	0.901137
	1.15045	0.90196
	1.15242	0.902289
	1.15292	0.90377
	1.15588	0.904429
	1.15868	0.905745
	1.15933	0.906568
	1.16559	0.908049
	1.16625	0.908213
	1.16773	0.908378
	1.17085	0.909365
	1.17184	0.910188
	1.17217	0.910682
	1.17595	0.911834
	1.17678	0.912821
	1.17957	0.912821
	1.18056	0.912986
	1.18089	0.91529
	1.18632	0.91529
	1.18764	0.916277
	1.18928	0.917593
	1.19027	0.918087
	1.19406	0.92072
	1.19504	0.92072
	1.19603	0.921049
	1.19768	0.921378
	1.19883	0.922366
	1.19932	0.924011
	1.19965	0.924176
	1.20163	0.92434
	1.20673	0.925328
	1.20673	0.926151
	1.21644	0.926151
	1.21726	0.926315
	1.22187	0.926315
	1.22861	0.926973
	1.22977	0.928619
	1.2324	0.9301
	1.23256	0.932404
	1.23355	0.932569
	1.23372	0.933391
	1.24606	0.934214
	1.24869	0.935201
	1.25001	0.935531
	1.25116	0.938164
	1.2533	0.939809
	1.25445	0.939974
	1.25577	0.941949
	1.25659	0.9431
	1.2584	0.943923
	1.25889	0.944252
	1.25939	0.944417
	1.26251	0.944746
	1.26383	0.946227
	1.27272	0.946885
	1.27354	0.947873
	1.27387	0.948037
	1.27667	0.94886
	1.27683	0.950341
	1.28144	0.950341
	1.28259	0.95067
	1.28325	0.951164
	1.28374	0.951658
	1.28654	0.951822
	1.28769	0.953303
	1.29181	0.954126
	1.29213	0.955278
	1.29345	0.956101
	1.2951	0.95643
	1.29559	0.956594
	1.29641	0.957582
	1.3002	0.957746
	1.30053	0.958076
	1.303	0.958569
	1.30415	0.958734
	1.30579	0.959227
	1.30777	0.959721
	1.31238	0.959721
	1.31287	0.961696
	1.31402	0.962683
	1.31567	0.963506
	1.31715	0.967949
	1.32241	0.969759
	1.32406	0.970088
	1.32422	0.970747
	1.32422	0.972557
	1.33492	0.973051
	1.35385	0.973709
	1.3573	0.974696
	1.35796	0.974696
	1.36043	0.976671
	1.36059	0.977
	1.36948	0.979962
	1.37145	0.981443
	1.37507	0.982595
	1.37524	0.982924
	1.38083	0.984241
	1.38133	0.986051
	1.38166	0.98819
	1.3838	0.991646
	1.3838	0.991811
	1.38791	0.992304
	1.39169	0.994937
	1.39318	0.999051
	1.40585	1.00004
	1.40881	1.00037
	1.41029	1.00448
	1.41819	1.00679
	1.42247	1.01024
	1.42263	1.01222
	1.42395	1.01403
	1.42559	1.01403
	1.4279	1.01732
	1.43053	1.01995
	1.43892	1.02225
	1.44172	1.02456
	1.44534	1.02522
	1.45291	1.02884
	1.46525	1.03246
	1.49504	1.03624
	1.49553	1.03657
	1.50129	1.03822
	1.50162	1.04003
	1.50294	1.04036
	1.50458	1.04085
	1.50639	1.04167
	1.50936	1.05204
	1.52844	1.05319
	1.52844	1.05336
	1.53865	1.05714
	1.5449	1.05731
	1.55823	1.06389
	1.56317	1.06389
	1.56383	1.06438
	1.56498	1.0708
	1.56777	1.07096
	1.57024	1.07376
	1.5816	1.07458
	1.58472	1.07508
	1.58983	1.07672
	1.61928	1.07919
	1.62751	1.08034
	1.63014	1.0945
	1.6308	1.09713
	1.63195	1.0996
	1.63212	1.10207
	1.63771	1.10207
	1.64397	1.10322
	1.64874	1.10355
	1.64956	1.10552
	1.65187	1.11095
	1.65269	1.12099
	1.66157	1.12313
	1.66635	1.12889
	1.68083	1.12889
	1.68132	1.12988
	1.69284	1.13103
	1.69942	1.13778
	1.70025	1.13893
	1.71868	1.13992
	1.73365	1.14041
	1.73645	1.14633
	1.73859	1.15012
	1.75455	1.15226
	1.75488	1.15308
	1.77364	1.15522
	1.78384	1.16164
	1.79306	1.16378
	1.79783	1.16756
	1.81314	1.16773
	1.81906	1.16871
	1.82136	1.1725
	1.82169	1.17645
	1.82235	1.17875
	1.83453	1.18221
	1.84144	1.18583
	1.84309	1.18797
	1.85033	1.19159
	1.86382	1.19504
	1.86612	1.19916
	1.88521	1.20327
	1.89213	1.21677
	1.89739	1.21874
	1.90463	1.2194
	1.90759	1.22006
	1.92372	1.24655
	1.93359	1.24705
	1.93837	1.26153
	1.94149	1.26465
	1.94495	1.29279
	1.9642	1.30859
	1.97836	1.3262
	2.00863	1.35171
	2.05537	1.35187
	2.07331	1.37721
	2.12268	1.37952
	2.14292	1.37985
	2.15806	1.40469
	2.1648	1.41819
	2.20726	1.42329
	2.20891	1.42543
	2.25794	1.44995
	2.30814	1.46575
	2.37758	1.48154
	2.38597	1.51495
	2.49738	1.54704
	2.56123	1.56169
