# Supplementary material for: Competition in the chaperone-client network subordinates cell-cycle entry to growth and stress
Source: Life Sci Alliance. 2019 Apr 15;2(2):e201800277. doi: 10.26508/lsa.201800277 (PMC6467244; doi:10.26508/lsa.201800277)
Supplement: Supplementary file 4 [file LSA-2018-00277_SdataF4.xlsx]

## Sheet: Panel B
Predictions of Ydj1A and Cln3F levels after CHX addition
ksProt reduction = 3 fold				ksProt reduction = 4.5 fold				ksProt reduction = 6 fold				ksProt reduction = 9 fold				ksProt reduction = 12 fold
time (r.u.)	Ydj1A	Cln3F		time (r.u.)	Ydj1A	Cln3F		time (r.u.)	Ydj1A	Cln3F		time (r.u.)	Ydj1A	Cln3F		time (r.u.)	Ydj1A	Cln3F
0	0.124294	0.276725		0	0.124293	0.276729		0	0.124292	0.276732		0	0.124291	0.276733		0	0.124291	0.276735
0.01	0.12428	0.276776		0.01	0.124278	0.276783		0.01	0.124276	0.276789		0.01	0.124275	0.276792		0.01	0.124275	0.276795
0.01	0.124267	0.276826		0.01	0.124264	0.276836		0.01	0.124261	0.276846		0.01	0.12426	0.27685		0.01	0.124259	0.276855
0.02	0.124254	0.276877		0.02	0.124251	0.27689		0.02	0.124247	0.276903		0.02	0.124245	0.276909		0.02	0.124244	0.276915
0.05	0.124181	0.277263		0.05	0.124169	0.277313		0.05	0.124157	0.277361		0.05	0.124151	0.277385		0.05	0.124145	0.277408
0.08	0.124143	0.27765		0.08	0.124124	0.277737		0.08	0.124105	0.27782		0.08	0.124096	0.277861		0.08	0.124087	0.277901
0.12	0.124136	0.278036		0.11	0.124112	0.27816		0.11	0.124088	0.278279		0.11	0.124077	0.278338		0.11	0.124065	0.278395
0.15	0.124157	0.278422		0.15	0.124129	0.278583		0.14	0.124102	0.278738		0.14	0.124089	0.278814		0.14	0.124076	0.278889
0.21	0.124239	0.279047		0.2	0.124211	0.279271		0.19	0.124182	0.279488		0.19	0.124168	0.279594		0.19	0.124154	0.279699
0.26	0.124374	0.279672		0.25	0.124348	0.27996		0.25	0.124322	0.280239		0.24	0.124309	0.280375		0.24	0.124296	0.280511
0.31	0.12455	0.280297		0.31	0.124531	0.280648		0.3	0.124512	0.28099		0.29	0.124501	0.281157		0.29	0.124491	0.281323
0.37	0.124761	0.280922		0.36	0.124752	0.281337		0.35	0.124742	0.281742		0.35	0.124736	0.28194		0.34	0.12473	0.282136
0.42	0.125	0.281547		0.41	0.125004	0.282027		0.4	0.125005	0.282494		0.4	0.125005	0.282724		0.39	0.125005	0.282951
0.52	0.125469	0.282634		0.51	0.125513	0.283257		0.5	0.125554	0.283868		0.49	0.125574	0.28417		0.49	0.125593	0.28447
0.61	0.125987	0.283722		0.6	0.12608	0.284488		0.59	0.12617	0.285245		0.59	0.126214	0.28562		0.58	0.126257	0.285994
0.7	0.126541	0.28481		0.69	0.126689	0.285721		0.68	0.126834	0.286625		0.68	0.126905	0.287074		0.68	0.126975	0.287522
0.8	0.127121	0.285898		0.79	0.127328	0.286955		0.78	0.127532	0.288007		0.77	0.127633	0.288532		0.77	0.127733	0.289055
0.89	0.127719	0.286986		0.88	0.127989	0.28819		0.87	0.128256	0.289392		0.87	0.128388	0.289993		0.86	0.12852	0.290593
0.99	0.128331	0.288074		0.98	0.128667	0.289427		0.97	0.129	0.290781		0.96	0.129165	0.291458		0.96	0.12933	0.292135
1.1	0.129075	0.289374		1.09	0.129467	0.290861		1.07	0.129855	0.292349		1.07	0.130048	0.293092		1.05	0.130158	0.293683
1.21	0.129829	0.290673		1.2	0.130279	0.292298		1.18	0.130725	0.29392		1.17	0.130947	0.294731		1.15	0.130999	0.295234
1.32	0.130592	0.291974		1.3	0.131102	0.293735		1.29	0.131607	0.295495		1.28	0.131858	0.296375		1.24	0.131852	0.296791
1.44	0.13136	0.293274		1.41	0.131932	0.295175		1.39	0.132498	0.297074		1.38	0.13278	0.298024		1.37	0.13302	0.298903
1.55	0.132134	0.294574		1.52	0.132769	0.296617		1.5	0.133397	0.298657		1.49	0.13371	0.299677		1.5	0.134204	0.301023
1.69	0.13309	0.296171		1.65	0.13379	0.298365		1.63	0.134494	0.300574		1.62	0.134862	0.301711		1.63	0.1354	0.303152
1.83	0.134051	0.297768		1.79	0.134818	0.300116		1.76	0.135599	0.302496		1.75	0.136026	0.303752		1.75	0.136609	0.30529
1.96	0.135017	0.299365		1.92	0.135853	0.30187		1.88	0.136714	0.304423		1.88	0.137199	0.3058		1.88	0.137828	0.307436
2.1	0.135987	0.300962		2.05	0.136895	0.303625		2.01	0.137837	0.306355		2	0.138382	0.307855		2.04	0.139387	0.310161
2.27	0.137171	0.302901		2.22	0.138234	0.305871		2.14	0.138967	0.308292		2.13	0.139575	0.309916		2.2	0.140962	0.3129
2.44	0.138361	0.304839		2.39	0.139582	0.30812		2.3	0.140411	0.310753		2.3	0.1411	0.312539		2.37	0.142554	0.315653
2.6	0.139556	0.306777		2.56	0.14094	0.310372		2.47	0.141867	0.313221		2.46	0.142641	0.315173		2.53	0.144162	0.318418
2.71	0.140316	0.308003		2.67	0.141806	0.311803		2.63	0.143335	0.315696		2.62	0.144196	0.317818		2.7	0.145944	0.321464
2.82	0.141078	0.309229		2.77	0.142676	0.313236		2.79	0.144816	0.318179		2.79	0.145766	0.320472		2.88	0.147746	0.324526
2.92	0.141842	0.310455		2.88	0.14355	0.31467		2.97	0.146403	0.320825		2.96	0.14746	0.323319		3.06	0.149569	0.327602
3.03	0.142579	0.311634		2.98	0.1444	0.316059		3.14	0.148004	0.323479		3.14	0.14917	0.326177		3.24	0.151493	0.33083
3.13	0.143318	0.312813		3.09	0.145253	0.317449		3.31	0.149619	0.326141		3.31	0.150897	0.329047		3.43	0.15344	0.334075
3.23	0.14406	0.313992		3.19	0.146109	0.31884		3.47	0.151078	0.328532		3.49	0.152691	0.332009		3.61	0.155409	0.337336
3.36	0.14498	0.315451		3.33	0.147278	0.320732		3.62	0.152548	0.330929		3.67	0.154503	0.334982		3.85	0.157943	0.341501
3.48	0.145904	0.316909		3.47	0.148453	0.322625		3.78	0.154029	0.333332		3.85	0.156333	0.337966		4.08	0.160515	0.345693
3.61	0.146831	0.318367		3.61	0.149635	0.324519		3.95	0.155671	0.335981		4.05	0.158386	0.341291		4.31	0.163124	0.349909
3.74	0.14778	0.319853		3.76	0.150823	0.326418		4.12	0.157326	0.338637		4.25	0.160461	0.34463		4.53	0.165542	0.353786
3.87	0.148731	0.321339		3.9	0.152018	0.328317		4.29	0.158996	0.341299		4.45	0.162559	0.347981		4.74	0.167992	0.357682
4	0.149686	0.322823		4.04	0.15322	0.330218		4.46	0.160729	0.344047		4.64	0.16463	0.351266		4.96	0.170474	0.361599
4.13	0.150688	0.324375		4.19	0.154501	0.332236		4.64	0.162478	0.346802		4.84	0.166723	0.354563		5.19	0.173242	0.36593
4.27	0.151693	0.325926		4.34	0.155789	0.334256		4.81	0.164241	0.349564		5.03	0.168837	0.357871		5.43	0.17605	0.370285
4.4	0.152701	0.327475		4.49	0.157084	0.336276		4.99	0.166073	0.352416		5.23	0.171085	0.361362		5.67	0.178897	0.374661
4.54	0.15372	0.329035		4.64	0.15839	0.338303		5.17	0.167921	0.355274		5.44	0.173357	0.364865		5.9	0.181735	0.378985
4.67	0.154742	0.330593		4.79	0.159702	0.34033		5.36	0.169784	0.358138		5.64	0.175654	0.368379		6.13	0.184612	0.383329
4.81	0.155767	0.33215		4.94	0.16102	0.342358		5.54	0.171685	0.361041		5.85	0.177976	0.371906		6.36	0.187527	0.387692
4.95	0.156818	0.33374		5.09	0.162381	0.344441		5.72	0.173602	0.363949		6.05	0.180324	0.375444		6.59	0.190482	0.392074
5.09	0.157872	0.335327		5.25	0.163749	0.346523		5.9	0.175534	0.366862		6.26	0.182696	0.378992		6.83	0.193476	0.396474
5.23	0.15893	0.336913		5.4	0.165124	0.348606		6.09	0.177527	0.369847		6.47	0.185173	0.382669		7.06	0.196509	0.400891
5.37	0.160008	0.338524		5.56	0.166527	0.35072		6.28	0.179536	0.372836		6.68	0.187677	0.386355		7.29	0.199582	0.405325
5.51	0.161089	0.340132		5.71	0.167936	0.352834		6.47	0.181562	0.375829		6.89	0.190207	0.39005		7.52	0.202695	0.409775
5.65	0.162174	0.341738		5.87	0.169352	0.354947		6.66	0.183635	0.378871		7.11	0.192788	0.39379		7.75	0.205848	0.414239
5.79	0.16328	0.34337		6.03	0.170804	0.357101		6.85	0.185724	0.381917		7.32	0.195396	0.397537		7.99	0.209042	0.418718
5.94	0.164389	0.345		6.19	0.172262	0.359254		7.04	0.18783	0.384965		7.53	0.19803	0.401293		8.22	0.212275	0.423211
6.08	0.165502	0.346627		6.35	0.173728	0.361406		7.23	0.189999	0.388082		7.75	0.200764	0.405156		8.45	0.215549	0.427716
6.23	0.166637	0.34828		6.51	0.175226	0.363596		7.42	0.192185	0.391202		7.97	0.203526	0.409026		8.68	0.218863	0.432234
6.37	0.167775	0.34993		6.68	0.176732	0.365785		7.62	0.194389	0.394324		8.19	0.206316	0.412903		8.92	0.222217	0.436762
6.52	0.168916	0.351577		6.84	0.178246	0.367972		7.82	0.19665	0.397505		8.42	0.209179	0.416846		9.15	0.225612	0.4413
6.67	0.170081	0.353252		7	0.179794	0.370198		8.01	0.19893	0.400688		8.64	0.212072	0.420795		9.41	0.229432	0.446354
6.82	0.171249	0.354923		7.17	0.18135	0.372422		8.21	0.201226	0.403871		8.86	0.214993	0.424748		9.66	0.233302	0.451418
6.97	0.172419	0.35659		7.33	0.182913	0.374644		8.41	0.203592	0.407125		9.09	0.218018	0.428804		9.92	0.237221	0.456491
7.12	0.173615	0.358286		7.5	0.184514	0.376907		8.62	0.205975	0.410379		9.32	0.221073	0.432864		10.18	0.241191	0.461572
7.27	0.174814	0.359978		7.67	0.186121	0.379168		8.82	0.208376	0.413632		9.55	0.224158	0.436925		10.41	0.244788	0.466128
7.42	0.176015	0.361666		7.84	0.187736	0.381425		9.02	0.210847	0.416955		9.78	0.227338	0.441072		10.64	0.248425	0.470687
7.58	0.177242	0.363383		8.01	0.189391	0.383725		9.23	0.213337	0.420275		10.01	0.230548	0.44522		10.87	0.252101	0.47525
7.73	0.178472	0.365096		8.19	0.191053	0.386021		9.44	0.215844	0.423594		10.25	0.233789	0.449367		11.1	0.255817	0.479815
7.89	0.179705	0.366804		8.36	0.192722	0.388314		9.65	0.218429	0.426987		10.49	0.237146	0.453622		11.34	0.259738	0.484583
8.05	0.180965	0.368543		8.53	0.194433	0.390651		9.86	0.221032	0.430377		10.73	0.240535	0.457873		11.58	0.263702	0.489351
8.21	0.182227	0.370277		8.71	0.196151	0.392984		10.07	0.223654	0.433763		10.97	0.243955	0.462122		11.83	0.267708	0.494117
8.36	0.183492	0.372005		8.89	0.197876	0.395312		10.29	0.226358	0.437228		11.21	0.247406	0.466366		12.07	0.271756	0.498882
8.53	0.184786	0.373765		9.07	0.199646	0.397687		10.5	0.229082	0.440687		11.44	0.250887	0.470605		12.81	0.284449	0.513495
8.69	0.186082	0.375519		9.25	0.201423	0.400056		10.72	0.231823	0.44414		11.68	0.254398	0.474837		13.55	0.297519	0.52804
8.85	0.187381	0.377268		9.42	0.203207	0.402419		10.94	0.234655	0.447676		11.92	0.257938	0.479063		14.29	0.310949	0.542482
9.01	0.18871	0.379049		9.61	0.205039	0.404831		11.16	0.237506	0.451205		12.16	0.261508	0.483279		15.03	0.324717	0.556784
9.18	0.19004	0.380824		9.79	0.206877	0.407237		11.39	0.240375	0.454726		12.4	0.265106	0.487487		15.77	0.338798	0.57091
9.34	0.191373	0.382592		9.98	0.208722	0.409636		11.61	0.243342	0.458335		12.64	0.268733	0.491684		16.51	0.353165	0.584824
9.51	0.192738	0.384395		10.17	0.210618	0.412086		11.84	0.246329	0.461934		12.88	0.272386	0.49587		17.25	0.367783	0.59849
9.68	0.194105	0.38619		10.35	0.212521	0.414528		12.07	0.249333	0.465522		13.12	0.276067	0.500044		18.08	0.384304	0.613366
9.85	0.195473	0.387978		10.54	0.214429	0.416962		12.3	0.252445	0.469205		13.36	0.279774	0.504204		18.9	0.401035	0.627846
10.03	0.196875	0.389802		10.74	0.216393	0.419449		12.54	0.255576	0.472875		13.6	0.283507	0.508349		19.73	0.417918	0.641888
10.2	0.198278	0.391617		10.93	0.218362	0.421928		12.77	0.258725	0.476532		13.84	0.287265	0.51248		20.55	0.434888	0.655452
10.37	0.199683	0.393425		11.12	0.220337	0.424397		13.02	0.261992	0.48029		14.11	0.291554	0.517143		21.38	0.451876	0.668502
10.55	0.201124	0.395269		11.32	0.222371	0.426922		13.26	0.265277	0.484032		14.38	0.295874	0.521783		22.01	0.464986	0.678224
10.73	0.202565	0.397104		11.52	0.224411	0.429437		13.5	0.268579	0.487756		14.65	0.300223	0.5264		22.65	0.478031	0.687605
10.9	0.204007	0.398931		11.72	0.226455	0.431941		13.75	0.271898	0.491462		14.93	0.3046	0.530991		23.29	0.490978	0.696635
11.09	0.205488	0.400796		11.92	0.228563	0.434504		13.99	0.275232	0.495149		15.18	0.30872	0.535263		23.93	0.503795	0.705304
11.27	0.206968	0.40265		12.13	0.230676	0.437054		14.23	0.27858	0.498816		15.43	0.312863	0.539511		24.4	0.513226	0.711514
11.45	0.208449	0.404496		12.33	0.232793	0.439592		14.47	0.281943	0.502462		15.69	0.317027	0.543733		24.88	0.522553	0.717518
11.64	0.20997	0.40638		12.54	0.234978	0.442193		14.72	0.285319	0.506086		15.94	0.321211	0.547929		25.35	0.531765	0.723312
11.82	0.211491	0.408254		12.75	0.237167	0.444779		14.96	0.288708	0.509688		16.38	0.328493	0.555118		25.83	0.540847	0.728896
12.01	0.213012	0.410117		12.96	0.23936	0.447351		15.2	0.292109	0.513267		16.82	0.335825	0.562218		26.35	0.550694	0.734805
12.2	0.214576	0.412022		13.18	0.241626	0.449988		15.44	0.29552	0.516822		17.26	0.343203	0.569222		26.87	0.560355	0.740456
12.4	0.216138	0.413914		13.39	0.243895	0.45261		15.69	0.298942	0.520352		17.7	0.350619	0.576126		27.4	0.569817	0.74585
12.59	0.2177	0.415795		13.61	0.246168	0.455215		15.96	0.302822	0.524311		18.86	0.370345	0.593844		27.92	0.579067	0.750988
12.79	0.219307	0.417718		13.83	0.248518	0.457889		16.23	0.306712	0.528237		20.02	0.390157	0.610734		28.42	0.587666	0.755642
12.98	0.220913	0.419629		14.06	0.250872	0.460544		16.51	0.310611	0.532128		20.31	0.395107	0.614818		28.91	0.596054	0.760068
13.18	0.222516	0.421525		14.28	0.253227	0.463181		16.78	0.314519	0.535983		20.6	0.400052	0.618843		29.41	0.604221	0.764267
13.39	0.224168	0.423467		14.51	0.255667	0.465891		17.04	0.318244	0.539617		20.89	0.404988	0.62281		29.91	0.61216	0.768241
13.59	0.225818	0.425394		14.75	0.258108	0.46858		17.3	0.321973	0.543216		21.18	0.409915	0.626717		30.4	0.619775	0.771951
13.79	0.227465	0.427307		14.98	0.260549	0.471247		17.57	0.325707	0.546781		21.47	0.414828	0.630563		30.89	0.627156	0.775449
14	0.229162	0.429266		15.22	0.263082	0.473992		17.83	0.329443	0.550309		21.86	0.421243	0.635508		31.39	0.634302	0.778738
14.22	0.230857	0.431209		15.46	0.265615	0.476712		18.11	0.333526	0.554121		22.24	0.427627	0.640345		31.88	0.641207	0.781824
14.43	0.232548	0.433136		15.7	0.268146	0.479409		18.4	0.337609	0.557889		22.62	0.433975	0.645073		32.39	0.648124	0.784817
14.64	0.234294	0.435112		15.95	0.270777	0.482187		18.68	0.341692	0.561611		23	0.440284	0.649689		32.9	0.65478	0.7876
14.86	0.236035	0.43707		16.2	0.273406	0.484937		18.97	0.345771	0.565286		23.55	0.44934	0.656177		33.41	0.661174	0.790179
15.08	0.237771	0.439009		16.45	0.276031	0.48766		19.61	0.354901	0.573354		24.1	0.458286	0.662425		33.92	0.667307	0.792558
15.31	0.239565	0.441		16.71	0.278765	0.49047		20.24	0.363991	0.581173		24.65	0.467109	0.668433		34.48	0.673682	0.794925
15.53	0.241354	0.442971		16.97	0.281494	0.493248		20.88	0.373024	0.588736		25.2	0.475796	0.674197		35.03	0.679754	0.797071
15.76	0.243136	0.444922		17.23	0.284216	0.495995		21.52	0.381981	0.596036		25.7	0.483574	0.679232		35.59	0.685528	0.799003
15.99	0.24498	0.446926		17.49	0.286933	0.49871		21.92	0.387535	0.600463		26.2	0.491219	0.684064		36.14	0.691011	0.80073
16.23	0.246817	0.448909		17.75	0.289643	0.501393		22.32	0.393049	0.604783		26.7	0.498723	0.688693		36.77	0.69685	0.80244
16.46	0.248646	0.450869		18.01	0.292344	0.504043		22.72	0.398518	0.608996		27.21	0.506076	0.693119		37.4	0.702337	0.803908
16.7	0.250541	0.452885		18.28	0.295037	0.50666		23.12	0.403939	0.6131		27.7	0.513168	0.697283		38.02	0.707481	0.805147
16.95	0.252427	0.454877		18.54	0.297721	0.509243		23.47	0.408638	0.6166		28.19	0.5201	0.701253		38.65	0.712295	0.806167
17.19	0.254304	0.456844		18.8	0.300395	0.511793		23.82	0.413295	0.620016		28.69	0.526867	0.70503		39.28	0.716793	0.806978
17.45	0.25625	0.458869		19.09	0.303364	0.514596		24.17	0.417907	0.623347		29.18	0.533465	0.708617		39.9	0.720986	0.80759
17.7	0.258186	0.460867		19.38	0.306318	0.517356		24.52	0.422471	0.626594		29.68	0.539926	0.712036		40.53	0.72489	0.808015
17.95	0.260111	0.462839		19.67	0.309258	0.520073		24.96	0.428095	0.630524		30.18	0.546207	0.715267		41.28	0.72923	0.808291
18.22	0.26211	0.46487		19.96	0.31218	0.522747		25.39	0.433636	0.634322		30.67	0.552305	0.718313		42.04	0.733192	0.808324
18.48	0.264096	0.466872		20.24	0.314986	0.525287		25.83	0.439092	0.637987		31.17	0.558216	0.721178		42.8	0.7368	0.80813
18.75	0.266069	0.468844		20.52	0.317774	0.527785		26.26	0.444457	0.64152		31.67	0.564025	0.723904		43.55	0.740077	0.807725
19.03	0.268119	0.470877		20.8	0.320545	0.530242		26.69	0.449553	0.644809		32.18	0.569638	0.72645		44.31	0.743045	0.807122
19.3	0.270154	0.472878		21.08	0.323298	0.532658		27.11	0.454559	0.647975		32.68	0.575056	0.72882		44.87	0.745063	0.806555
19.58	0.272174	0.474846		21.35	0.325933	0.534947		27.53	0.459472	0.651019		33.19	0.580279	0.73102		45.43	0.746933	0.805893
19.87	0.274276	0.476876		21.63	0.32855	0.537198		27.95	0.464289	0.653943		33.72	0.585607	0.733171		45.99	0.748661	0.80514
20.16	0.27636	0.478871		21.9	0.331147	0.539409		28.4	0.469334	0.656938		34.26	0.590717	0.735139		46.55	0.750257	0.804301
20.46	0.278425	0.48083		22.17	0.333725	0.541581		28.85	0.474265	0.659797		34.8	0.595612	0.73693		47.39	0.752404	0.802904
20.75	0.280472	0.482753		22.48	0.336641	0.544013		29.3	0.47908	0.662522		35.33	0.600293	0.738549		48.22	0.754298	0.801342
21.04	0.282499	0.48464		22.78	0.339531	0.546394		29.75	0.483777	0.665116		35.92	0.605213	0.740142		49.06	0.755962	0.79963
21.33	0.284505	0.486492		23.09	0.342392	0.548723		30.24	0.488704	0.667765		36.51	0.609883	0.741541		49.89	0.757417	0.79778
21.62	0.286492	0.488307		23.4	0.345224	0.551002		30.72	0.493492	0.670265		37.1	0.614309	0.742753		50.73	0.758683	0.795805
21.91	0.288458	0.490087		23.72	0.348074	0.553268		31.21	0.498138	0.672619		37.69	0.618495	0.743785		51.84	0.760111	0.792986
22.2	0.290402	0.491831		24.03	0.350892	0.555481		31.69	0.502642	0.67483		38.37	0.622989	0.744752		52.96	0.76127	0.789988
22.54	0.292603	0.493786		24.34	0.353678	0.557642		32.21	0.507281	0.677031		39.04	0.627192	0.745507		54.08	0.762196	0.786832
22.87	0.294776	0.495693		24.66	0.35643	0.559751		32.73	0.511758	0.679076		39.72	0.631115	0.74606		55.2	0.762917	0.783539
23.2	0.29692	0.497555		24.98	0.359251	0.561884		33.25	0.516075	0.680969		40.39	0.63477	0.746421		56.31	0.763462	0.780128
23.54	0.299034	0.49937		25.31	0.362035	0.563961		33.76	0.520232	0.682715		41.14	0.638554	0.746611		57.18	0.763776	0.777421
23.85	0.300977	0.501021		25.64	0.364781	0.565983		34.32	0.524509	0.684427		41.9	0.642034	0.746588		58.04	0.764008	0.77466
24.16	0.302894	0.502631		25.96	0.367488	0.567949		34.87	0.528607	0.685979		42.65	0.645227	0.746367		58.9	0.764167	0.771852
24.47	0.304785	0.504203		26.3	0.370222	0.569908		35.43	0.532528	0.687377		43.4	0.648151	0.74596		59.77	0.76426	0.769003
24.78	0.30665	0.505736		26.63	0.372915	0.571809		35.98	0.536273	0.688625		44.24	0.651118	0.745302		61.16	0.764289	0.764322
25.04	0.308199	0.506997		26.97	0.375566	0.573653		36.59	0.540217	0.689838		45.08	0.653791	0.744444		62.56	0.764189	0.75957
25.31	0.30973	0.50823		27.3	0.378174	0.575441		37.2	0.543956	0.690881		45.92	0.65619	0.743403		63.96	0.763982	0.754766
25.57	0.311241	0.509437		27.65	0.380854	0.577249		37.82	0.547495	0.691762		46.77	0.658337	0.742194		65.35	0.763687	0.749926
26.03	0.313867	0.511504		28	0.383486	0.578997		38.43	0.550842	0.692488		47.61	0.660251	0.740829		66.75	0.763317	0.745065
26.49	0.316432	0.513489		28.35	0.38607	0.580684		39.12	0.554406	0.69313		48.15	0.66138	0.739865		68.58	0.762742	0.73869
26.96	0.318935	0.515391		28.7	0.388606	0.582312		39.82	0.557739	0.693592		48.7	0.662423	0.738844		70.41	0.762085	0.732326
27.42	0.321377	0.517213		29.07	0.391229	0.583966		40.51	0.56085	0.693883		49.25	0.663384	0.737771		72.24	0.761363	0.725994
27.76	0.323104	0.51848		29.44	0.393798	0.585556		41.21	0.563749	0.694012		49.8	0.664268	0.736647		74.07	0.760591	0.719713
28.09	0.324799	0.519706		29.8	0.396312	0.587081		42.03	0.566909	0.693968		50.59	0.665422	0.734937		75.89	0.75978	0.713497
28.43	0.326462	0.520891		30.17	0.398772	0.588544		42.84	0.569802	0.693725		51.38	0.666434	0.733138		76.97	0.759289	0.709879
28.76	0.328093	0.522036		30.57	0.401334	0.590036		43.66	0.572444	0.693299		52.18	0.667318	0.731258		78.05	0.758789	0.706289
29.09	0.329672	0.523128		30.96	0.403835	0.591458		44.48	0.574849	0.692701		52.97	0.668083	0.729304		79.12	0.758281	0.702731
29.42	0.331219	0.524181		31.35	0.406274	0.592812		45.38	0.577241	0.69186		54.35	0.66916	0.72575		80.2	0.757767	0.699204
29.75	0.332735	0.525197		31.74	0.408652	0.5941		46.29	0.579384	0.690843		55.73	0.669954	0.722031		80.8	0.757473	0.697221
30.08	0.334221	0.526176		32.17	0.411149	0.595416		47.19	0.581296	0.689666		57.11	0.670506	0.718177		81.41	0.757178	0.695248
30.39	0.335568	0.527049		32.59	0.413576	0.596657		48.09	0.582994	0.688343		58.49	0.67085	0.714216		82.02	0.756881	0.693287
30.7	0.336889	0.527892		33.02	0.415932	0.597825		49.3	0.584967	0.686361		59.87	0.671018	0.710172		83.88	0.755969	0.687381
31	0.338184	0.528704		33.44	0.418219	0.598922		50.51	0.586623	0.684171		61.02	0.671043	0.706756		85.74	0.755048	0.681588
31.73	0.341177	0.530525		33.9	0.420639	0.60004		51.72	0.587996	0.681799		62.17	0.670976	0.703307		87.59	0.754121	0.675909
32.46	0.344024	0.532182		34.37	0.422978	0.601077		52.93	0.589118	0.679271		63.32	0.67083	0.699836		89.45	0.75319	0.670347
33.2	0.34673	0.53368		34.83	0.425237	0.602034		54.14	0.590017	0.676611		64.47	0.670615	0.696351		91.1	0.752362	0.665509
33.93	0.349299	0.535026		35.29	0.427417	0.602915		54.75	0.590394	0.675222		65.62	0.67034	0.692859		92.75	0.751533	0.660765
34.28	0.350502	0.53563		35.81	0.429742	0.603804		55.36	0.590725	0.673806		66.24	0.670169	0.690979		94.4	0.750703	0.656114
34.64	0.351674	0.536199		36.32	0.431975	0.604603		55.97	0.591011	0.672367		66.86	0.669985	0.689099		96.05	0.749875	0.651556
35	0.352815	0.536736		36.83	0.434116	0.605317		56.59	0.591255	0.670906		67.48	0.669787	0.687221		98.11	0.748837	0.645969
35.35	0.353926	0.537239		37.35	0.436168	0.605947		57.22	0.591467	0.669377		68.1	0.669577	0.685346		100.18	0.747802	0.640524
35.72	0.355028	0.537721		37.92	0.438373	0.606561		57.85	0.591639	0.667829		68.98	0.669263	0.682705		102.25	0.74677	0.635217
36.08	0.356098	0.538169		38.5	0.440471	0.607076		58.48	0.591775	0.666264		69.85	0.668928	0.680074		104.31	0.745741	0.630045
36.45	0.357139	0.538586		39.08	0.442465	0.607498		59.11	0.591876	0.664685		70.73	0.668575	0.677453		106.95	0.744435	0.623637
36.81	0.358149	0.538973		39.66	0.444357	0.60783		60.61	0.591994	0.660889		71.6	0.668206	0.674845		109.59	0.743136	0.617432
37.22	0.359241	0.539367		40.32	0.446407	0.608105		62.11	0.591959	0.657041		73.36	0.667421	0.669634		112.23	0.741845	0.611421
37.62	0.360296	0.539726		40.98	0.448332	0.608272		63.6	0.591794	0.65316		75.12	0.666589	0.66449		112.89	0.741523	0.609948
38.03	0.361316	0.540048		41.65	0.450139	0.608337		65.1	0.591519	0.649262		76.89	0.66572	0.659422		113.55	0.741202	0.608486
38.44	0.362302	0.540337		42.31	0.451831	0.608305		66.6	0.591152	0.64536		78.65	0.664822	0.654436		114.21	0.740882	0.607035
39.01	0.363641	0.540687		43.09	0.453675	0.608152		67.79	0.590802	0.642262		80.1	0.664064	0.650392		114.86	0.740562	0.605596
39.59	0.364914	0.540974		43.86	0.455377	0.607881		68.98	0.59041	0.639175		81.55	0.663295	0.646408		115.52	0.740243	0.604167
40.16	0.366124	0.541198		44.64	0.456943	0.607501		70.17	0.58998	0.636102		83.01	0.662515	0.642486		116.38	0.739831	0.602338
40.74	0.367273	0.541363		45.41	0.458382	0.607018		71.36	0.589517	0.633048		84.46	0.661728	0.638627		117.23	0.73942	0.600527
41.29	0.368316	0.541467		46.35	0.459951	0.606312		72.67	0.588979	0.629737		85.6	0.661105	0.635635		118.08	0.739011	0.598733
41.84	0.369307	0.541522		47.28	0.461358	0.60548		73.97	0.588412	0.626456		86.74	0.660478	0.632682		118.93	0.738602	0.596957
42.39	0.370247	0.541528		48.21	0.462615	0.604534		75.27	0.58782	0.623207		87.88	0.65985	0.629768		119.82	0.738175	0.595113
42.94	0.371139	0.541489		49.14	0.463732	0.603483		76.57	0.587208	0.619993		89.03	0.659219	0.626893		120.71	0.737748	0.593288
43.68	0.372263	0.541368		50.29	0.464932	0.602058		77.86	0.586582	0.616838		90.09	0.658632	0.624254		121.6	0.737323	0.59148
44.42	0.373306	0.541173		51.44	0.465953	0.600504		79.15	0.585942	0.613721		91.15	0.658044	0.621648		124	0.736186	0.586704
45.16	0.374272	0.540907		52.59	0.466812	0.598839		80.44	0.585289	0.610644		92.22	0.657456	0.619075		126.4	0.735056	0.582045
45.9	0.375165	0.540576		53.74	0.467524	0.597077		81.74	0.584626	0.607606		93.28	0.656867	0.616534		128.79	0.733933	0.577495
46.64	0.375991	0.540183		55.03	0.468163	0.595008		82.92	0.584013	0.604863		95.26	0.655773	0.611893		131.19	0.732818	0.573049
47.38	0.376751	0.539731		56.32	0.468655	0.592849		84.1	0.583393	0.602155		97.24	0.654682	0.607361		133.15	0.731912	0.56948
48.13	0.377448	0.539226		57.6	0.469015	0.590617		85.28	0.582769	0.59948		99.21	0.653593	0.602935		135.11	0.73101	0.565973
48.87	0.378086	0.53867		58.89	0.469259	0.588322		86.46	0.582141	0.59684		101.19	0.652509	0.59861		137.08	0.730114	0.562525
49.86	0.378852	0.537855		60.43	0.469417	0.585509		87.53	0.581568	0.594467		103.85	0.651061	0.59296		139.04	0.729223	0.559132
50.85	0.379525	0.536964		61.97	0.469447	0.582642		88.61	0.580992	0.592122		106.5	0.649623	0.587479		139.91	0.728828	0.557638
51.85	0.380112	0.536004		62.35	0.469436	0.581919		89.68	0.580414	0.589804		109.16	0.648196	0.582157		140.79	0.728434	0.556154
52.84	0.38062	0.534983		62.74	0.469419	0.581193		90.76	0.579836	0.587514		109.82	0.647842	0.58085		141.66	0.728041	0.55468
53.98	0.381118	0.533734		63.12	0.469396	0.580466		91.85	0.579247	0.585211		110.48	0.647488	0.579553		143.52	0.727209	0.55158
55.13	0.381526	0.532419		63.51	0.469366	0.579737		92.95	0.578658	0.582936		111.15	0.647134	0.578265		145.38	0.726382	0.548521
56.28	0.381854	0.531047		63.89	0.469331	0.579006		94.04	0.578069	0.580688		111.81	0.646782	0.576985		147.24	0.72556	0.545502
57.43	0.382109	0.529626		64.43	0.469271	0.577977		95.14	0.57748	0.578468		112.6	0.646364	0.575477		149.09	0.724743	0.542521
58.43	0.382279	0.528342		64.97	0.469201	0.576947		97.22	0.576362	0.574317		113.39	0.645947	0.57398		149.98	0.724356	0.541118
59.44	0.382401	0.527029		65.51	0.469121	0.575914		99.3	0.575248	0.57026		114.18	0.645531	0.572496		150.86	0.723971	0.539722
60.45	0.382481	0.525691		66.06	0.469032	0.574881		101.38	0.57414	0.566292		116.72	0.644197	0.567783		151.74	0.723587	0.538334
61.46	0.382522	0.524332		66.57	0.468939	0.573902		103.46	0.573037	0.562411		119.27	0.642874	0.563186		153.21	0.722951	0.536047
61.89	0.382528	0.523742		67.08	0.468838	0.572923		105.1	0.572177	0.559421		121.81	0.641564	0.558697		154.67	0.722319	0.53378
62.32	0.382528	0.52315		67.59	0.46873	0.571944		106.73	0.571321	0.556481		122.45	0.641238	0.557591		156.14	0.72169	0.531533
62.75	0.382522	0.522554		69.17	0.468355	0.568923		108.37	0.570469	0.553588		123.09	0.640913	0.556491		158.77	0.720567	0.52754
64.01	0.382473	0.520814		70.75	0.467924	0.56591		110	0.569623	0.55074		123.72	0.640589	0.555398		161.41	0.719453	0.523603
65.26	0.382379	0.519056		72.33	0.467446	0.562914		110.73	0.569249	0.54949		124.36	0.640266	0.55431		162.06	0.719177	0.522627
66.52	0.382247	0.517285		72.72	0.46732	0.562167		111.45	0.568876	0.548249		125.12	0.639879	0.553012		162.72	0.7189	0.521655
67.77	0.38208	0.515505		73.12	0.467191	0.561423		112.18	0.568504	0.547016		125.89	0.639492	0.551721		163.38	0.718625	0.520685
68.41	0.381982	0.514592		73.51	0.467061	0.560679		113.27	0.567948	0.545179		126.65	0.639107	0.55044		164.04	0.71835	0.519719
69.05	0.381877	0.513678		73.91	0.466928	0.559938		114.36	0.567393	0.54336		129.45	0.637709	0.545822		164.9	0.717992	0.51846
69.7	0.381765	0.512763		74.43	0.46675	0.558961		115.45	0.566841	0.541559		132.24	0.636326	0.541304		165.76	0.717634	0.517206
70.63	0.38159	0.511436		74.95	0.466568	0.557988		118.25	0.565436	0.537013		135.04	0.634958	0.53688		166.62	0.717278	0.515957
71.56	0.381403	0.510109		75.47	0.466383	0.557017		121.04	0.564048	0.532572		135.74	0.634619	0.535788		168.75	0.716402	0.512894
72.49	0.381204	0.508784		77.36	0.465685	0.55351		123.84	0.562676	0.528231		136.44	0.63428	0.534702		170.88	0.715533	0.50986
73.98	0.380862	0.50666		79.26	0.464955	0.550048		124.54	0.562336	0.52716		137.13	0.633942	0.53362		173	0.714671	0.506854
75.48	0.380498	0.504546		79.74	0.464768	0.54919		125.24	0.561997	0.526095		137.83	0.633606	0.532544		175.13	0.713815	0.503873
75.85	0.380403	0.504019		80.21	0.46458	0.548335		125.94	0.561659	0.525036		138.61	0.633234	0.531359		175.98	0.713477	0.502694
76.23	0.380308	0.503492		80.68	0.46439	0.547484		126.64	0.561322	0.523982		139.38	0.632864	0.53018		176.82	0.713139	0.501518
76.6	0.380211	0.502967		81.16	0.464199	0.546635		127.32	0.560997	0.52297		140.15	0.632494	0.529007		177.67	0.712802	0.500346
76.97	0.380113	0.502442		81.73	0.463967	0.545617		127.99	0.560674	0.521963		143.32	0.630995	0.524266		178.91	0.71231	0.498634
77.45	0.379988	0.501779		82.3	0.463733	0.544602		128.67	0.560352	0.520962		146.48	0.629516	0.519616		180.15	0.71182	0.49693
77.92	0.379861	0.501118		82.87	0.463498	0.543593		129.84	0.559796	0.519234		147.27	0.629149	0.518467		181.4	0.711333	0.495234
78.39	0.379732	0.500458		83.9	0.463074	0.5418		131.01	0.559242	0.517521		148.07	0.628783	0.517323		182.91	0.710743	0.49318
79.44	0.379443	0.499003		84.92	0.462647	0.540023		132.18	0.558691	0.515821		148.86	0.628419	0.516184		184.42	0.710156	0.491136
80.49	0.379148	0.497556		85.94	0.462216	0.538261		134.82	0.557462	0.512039		149.65	0.628056	0.51505		185.93	0.709572	0.489103
81.53	0.378846	0.496118		88.36	0.461188	0.53416		137.46	0.556247	0.508321		150.39	0.627716	0.513993		187.03	0.709151	0.487634
82.84	0.378464	0.494334		88.97	0.460929	0.533149		138.12	0.555946	0.507401		151.13	0.627378	0.51294		188.12	0.708731	0.486171
84.15	0.378075	0.492565		89.57	0.46067	0.532143		138.78	0.555645	0.506484		151.87	0.627042	0.511891		189.22	0.708313	0.484712
85.46	0.377681	0.49081		90.17	0.460411	0.531142		139.44	0.555346	0.505572		154.76	0.625738	0.50784		190.26	0.707918	0.483334
86.5	0.377363	0.489422		90.78	0.460151	0.530147		140.1	0.555048	0.504663		157.65	0.624451	0.503847		191.3	0.707525	0.48196
87.54	0.377044	0.488044		91.36	0.459899	0.529188		140.78	0.554742	0.503732		158.37	0.624132	0.502858		192.34	0.707133	0.48059
88.58	0.376722	0.486676		91.95	0.459647	0.528235		141.45	0.554438	0.502806		159.09	0.623813	0.501872		193.48	0.706704	0.47909
89.5	0.376439	0.485484		92.54	0.459394	0.527286		142.13	0.554134	0.501883		159.82	0.623496	0.500889		194.63	0.706277	0.477594
90.41	0.376155	0.484301		94.97	0.458343	0.523388		144.87	0.552917	0.498189		160.54	0.62318	0.49991		195.77	0.705852	0.476104
91.32	0.37587	0.483125		97.41	0.457294	0.519575		147.61	0.551717	0.49455		161.3	0.622846	0.498876		196.82	0.705466	0.474748
92.28	0.37557	0.481898		98.02	0.457032	0.518635		148.3	0.551419	0.493648		162.07	0.622513	0.497845		197.86	0.705081	0.473397
93.24	0.375269	0.48068		98.63	0.456771	0.5177		148.98	0.551122	0.49275		162.83	0.622181	0.496819		198.9	0.704698	0.472049
94.2	0.374969	0.47947		99.24	0.456509	0.516769		149.67	0.550827	0.491855		164.94	0.621275	0.494013		199.95	0.704317	0.470707
95.94	0.374425	0.477305		99.85	0.456248	0.515844		150.35	0.550532	0.490963		165.46	0.621049	0.493315		200	0.704297	0.470639
96.37	0.374289	0.476768		100.41	0.456012	0.515007		151.01	0.550249	0.490106		165.99	0.620825	0.492619
96.81	0.374153	0.476232		100.96	0.455775	0.514174		151.67	0.549967	0.489252		166.51	0.6206	0.491925
97.24	0.374017	0.475699		101.51	0.455539	0.513345		152.33	0.549686	0.488401		167.18	0.620317	0.491047
97.67	0.373882	0.475167		102.3	0.455206	0.512181		154.11	0.548933	0.48612		167.85	0.620034	0.490172
98.07	0.373756	0.474675		103.08	0.454874	0.511024		154.56	0.548745	0.485553		168.51	0.619753	0.489299
98.48	0.37363	0.474185		103.86	0.454543	0.509876		155	0.548558	0.484987		169.71	0.619246	0.48773
98.88	0.373505	0.473697		106.93	0.453255	0.505449		155.45	0.548372	0.484422		170.92	0.618743	0.486168
99.65	0.373265	0.472768		107.69	0.452936	0.50436		156.08	0.548107	0.483621		172.12	0.618242	0.484614
100.41	0.373026	0.471844		108.46	0.452617	0.503278		156.71	0.547844	0.482823		173.28	0.61776	0.483117
101.18	0.372788	0.470925		109.23	0.452299	0.502202		157.34	0.547581	0.482027		174.45	0.61728	0.481626
104.57	0.371739	0.466927		109.99	0.451983	0.501133		158.81	0.546973	0.480182		175.61	0.616803	0.480142
105.42	0.371479	0.465942		110.54	0.451756	0.500369		160.29	0.546369	0.47835		176.94	0.61626	0.478453
106.27	0.371219	0.464963		111.09	0.45153	0.499608		161.76	0.545769	0.476529		178.27	0.615721	0.476772
107.11	0.370961	0.463991		111.65	0.451304	0.49885		162.47	0.545481	0.475653		179.6	0.615185	0.475099
107.96	0.370703	0.463024		113.48	0.450555	0.496346		163.18	0.545194	0.474781		180.5	0.614825	0.473973
108.41	0.370567	0.462516		115.32	0.449813	0.493877		163.89	0.544908	0.473911		181.4	0.614466	0.472851
108.86	0.370432	0.462009		117.16	0.449077	0.491441		164.55	0.544646	0.473116		182.3	0.614108	0.471733
109.3	0.370297	0.461505		118.99	0.448348	0.489037		165.2	0.544386	0.472324		183.14	0.613775	0.470688
109.75	0.370161	0.460998		121.52	0.447358	0.485786		165.85	0.544127	0.471534		183.98	0.613443	0.469646
110.2	0.370025	0.460493		124.04	0.44638	0.48259		166.64	0.543812	0.470575		184.83	0.613112	0.468607
110.65	0.36989	0.459989		126.56	0.445416	0.479448		167.44	0.543499	0.469619		185.8	0.61273	0.467409
111.64	0.369595	0.458894		129.08	0.444465	0.476356		168.23	0.543187	0.468666		186.78	0.612351	0.466215
112.62	0.369302	0.457805		132.03	0.44337	0.472806		169.6	0.54265	0.467027		187.75	0.611973	0.465024
113.61	0.36901	0.456724		134.98	0.442294	0.469318		170.97	0.542118	0.465397		188.69	0.61161	0.463881
114.71	0.368684	0.455522		137.92	0.441234	0.465889		172.34	0.541589	0.463777		189.63	0.611249	0.46274
115.81	0.368361	0.454328		140.87	0.440193	0.462516		173.1	0.541297	0.46288		190.57	0.61089	0.461603
116.92	0.368039	0.453143		143.82	0.439168	0.459196		173.86	0.541006	0.461986		191.51	0.610533	0.460473
117.97	0.367733	0.452018		148.21	0.437673	0.454344		174.63	0.540716	0.461094		192.44	0.610177	0.459345
119.03	0.367428	0.4509		152.6	0.436215	0.449597		175.34	0.540444	0.460257		193.38	0.609823	0.458221
120.08	0.367126	0.44979		156.99	0.434793	0.444951		176.06	0.540173	0.459421		194.31	0.609475	0.457114
121.09	0.366836	0.44873		161.38	0.433408	0.4404		176.78	0.539902	0.458588		195.23	0.609128	0.456011
122.11	0.366549	0.447676		165.77	0.432057	0.43594		177.62	0.539587	0.457614		196.16	0.608783	0.454911
123.12	0.366262	0.446629		171.26	0.430417	0.430489		178.46	0.539273	0.456643		197.1	0.608435	0.4538
124.07	0.365996	0.445656		176.74	0.428829	0.425166		179.3	0.53896	0.455676		198.03	0.608089	0.452692
125.02	0.365732	0.444689		182.23	0.427292	0.419967		180.3	0.538593	0.454538		198.97	0.607744	0.451587
125.96	0.365469	0.443727		187.72	0.425803	0.414885		181.29	0.538227	0.453405		199.92	0.607399	0.45048
126.9	0.36521	0.442783		193.2	0.424362	0.409918		182.28	0.537864	0.452275		200	0.607368	0.450381
127.83	0.364953	0.441844		198.69	0.422967	0.405061		183.23	0.537519	0.451202
128.77	0.364697	0.44091		200	0.422639	0.403915		184.17	0.537176	0.450132
129.64	0.364461	0.440047						185.12	0.536834	0.449066
130.51	0.364225	0.439187						186.1	0.536481	0.447964
131.38	0.363991	0.438333						187.09	0.53613	0.446865
132.31	0.363742	0.43742						188.07	0.535781	0.44577
133.25	0.363493	0.436513						189.04	0.535437	0.44469
134.18	0.363246	0.43561						190.02	0.535095	0.443614
134.88	0.363061	0.434935						190.99	0.534754	0.442542
135.58	0.362878	0.434263						191.99	0.534405	0.441439
136.28	0.362695	0.433594						193	0.534057	0.44034
136.98	0.362513	0.432928						194	0.533712	0.439246
137.68	0.362331	0.432265						194.99	0.533373	0.438171
138.38	0.362151	0.431605						195.98	0.533036	0.437099
139.13	0.361957	0.430896						196.97	0.5327	0.436032
139.88	0.361764	0.43019						197.98	0.53236	0.434945
140.64	0.361573	0.429486						198.99	0.532021	0.433863
141.5	0.361354	0.428685						200	0.531684	0.432784
142.36	0.361136	0.427887
143.23	0.36092	0.427092
143.89	0.360754	0.426481
144.56	0.360588	0.425872
145.22	0.360423	0.425265
145.87	0.360263	0.424677
146.52	0.360104	0.42409
147.17	0.359945	0.423505
147.91	0.359765	0.422843
148.64	0.359587	0.422183
149.38	0.359409	0.421526
150.08	0.359242	0.420908
150.77	0.359075	0.420292
151.47	0.358909	0.419679
152.2	0.358735	0.419032
152.94	0.358561	0.418388
153.68	0.358388	0.417746
154.37	0.358225	0.41714
155.07	0.358062	0.416537
155.76	0.357901	0.415936
156.49	0.357733	0.415312
157.21	0.357566	0.414691
157.94	0.3574	0.414072
158.65	0.357238	0.413467
159.36	0.357077	0.412864
160.07	0.356916	0.412263
160.81	0.35675	0.411641
161.55	0.356584	0.411021
162.28	0.35642	0.410404
163	0.35626	0.409805
163.72	0.356101	0.409208
164.44	0.355943	0.408613
165.18	0.355782	0.408005
165.91	0.355621	0.407399
166.65	0.355461	0.406795
167.38	0.355304	0.406202
168.1	0.355147	0.405611
168.83	0.354992	0.405022
169.58	0.354833	0.40442
170.32	0.354675	0.40382
171.06	0.354517	0.403223
171.8	0.354363	0.402637
172.53	0.35421	0.402054
173.26	0.354057	0.401472
174.01	0.353902	0.400881
174.75	0.353748	0.400291
175.5	0.353594	0.399704
176.24	0.353443	0.399126
176.98	0.353293	0.39855
177.72	0.353143	0.397976
178.47	0.352991	0.397392
179.22	0.35284	0.396811
179.97	0.352689	0.396231
180.72	0.352541	0.395661
181.46	0.352394	0.395093
182.2	0.352247	0.394527
182.96	0.352099	0.393952
183.72	0.351951	0.39338
184.47	0.351804	0.392809
185.22	0.351659	0.392247
185.97	0.351515	0.391687
186.71	0.351371	0.391129
187.48	0.351226	0.390563
188.24	0.351081	0.389998
189	0.350937	0.389435
189.75	0.350795	0.388882
190.5	0.350654	0.38833
191.25	0.350514	0.38778
192.02	0.350372	0.387222
192.79	0.35023	0.386666
193.55	0.350089	0.386112
194.31	0.349951	0.385566
195.06	0.349813	0.385023
195.82	0.349676	0.384482
196.59	0.349537	0.383932
197.36	0.349398	0.383383
198.13	0.34926	0.382837
198.89	0.349125	0.3823
199.65	0.34899	0.381765
200	0.348929	0.381522

## Sheet: Panel C
Luciferase activity (r.u.)
	Ctrl			CHX
time (min)	mean	CL(0.05)		mean	CL(0.05)
0	1	0.042476		1	0.233396
10	5.55728	0.03034		7.21162	0.074518
20	7.71672	0.07585		11.8321	0.244644
30	10.2759	0.102397		14.3938	0.012654
40	10.656	0.0493025		17.3816	0.18278
50	10.8778	0.0441447		19.1894	0.2109
60	10.9748	0.122118		18.8755	0.263625

## Sheet: Panel D
Ydj1 diffusion (FCS analysis)
	Ctrl	CHX
mean	4.76765	6.8376
sd	2.15535	0.866124
N	50	50
CL(0.05)	0.597422	0.240073
	1.81811	4.85035
	1.83693	4.87149
	2.2466	5.04297
	2.28512	5.37683
	2.54894	5.72078
	2.59825	5.73571
	3.0875	5.84473
	3.09232	5.8669
	3.20636	6.2181
	3.38315	6.25249
	3.68181	6.26691
	4.29447	6.2904
	4.29707	6.4558
	4.57636	6.4873
	4.68094	6.50708
	4.76937	6.71728
	4.85142	6.72082
	5.12651	6.7375
	5.15962	6.77002
	5.19265	6.8596
	5.46547	7.0746
	5.50034	7.07621
	5.57823	7.12705
	5.92589	7.18011
	5.95259	7.18019
	6.00026	7.18349
	6.31527	7.19082
	6.45045	7.20086
	6.45954	7.23405
	6.4749	7.28853
	6.51378	7.34403
	6.60744	7.36941
	6.74238	7.40028
	7.0387	7.46389
	7.07312	7.52167
	7.08067	7.59742
	7.35464	7.64332
	7.40471	7.65721
	7.41013	7.68912
	7.76385	7.71803
	7.86735	7.75724
	7.89487	7.77962
	7.90571	7.78099
	7.91514	7.84391
	7.9318	7.86001
	8.07467	7.88199
	8.1513	7.8961
	8.40616	8.01926
	8.58587	8.03911
	8.74426	8.2986

## Sheet: Panel E
Ydj1 mobility (FLIP analysis) after CHX addition
	Ydj1-GFP			GFP
time (min)	mean	CL (0.05)		mean	CL (0.05)
0	1	0.090802		1	0.0448977
1	1.393	0.0590731		NA	NA
2	1.45176	0.09924		0.93809	0.0751543
4	1.40499	0.0895872		1.02459	0.028035
6	1.42172	0.117022		1.04535	0.0871222
8	1.50262	0.0980672		1.01655	0.0607908
10	1.46409	0.110553		0.947505	0.103666

## Sheet: Panel G
Nuclear to cytoplasmic CLN3-3HA levels by IF (r.u.) after CHX addition
wt									ydj1
time (sec)	0	15	30	45	60	90	120		time (sec)	0	15	30	45	60	90	120
mean	0.999837	0.853593	1.16226	2.00819	1.77494	1.53546	1.34664		mean	0.47	0.40549	0.368221	0.344506	0.377491	0.354395	0.328628
sd	0.930138	0.814023	1.20901	1.59616	1.50104	1.4341	1.16039		sd	0.28016	0.344009	0.321352	0.274932	0.283522	0.300452	0.268341
N	728	604	610	710	647	698	742		N	129	107	129	75	87	69	101
CL (0.05)	0.0675662	0.0649182	0.0959426	0.117407	0.115661	0.10639	0.083493		CL (0.05)	0.0483459	0.0651818	0.0554542	0.0622218	0.0595765	0.0708921	0.0523328
	5.93658	4.49493	8.37529	8.67931	9.80713	8.15626	8.19549			1.27762	2.25547	1.61844	1.10989	1.35792	1.70409	1.38469
	5.407	4.39686	6.79634	8.56816	8.92122	7.8032	6.68192			1.24015	1.24194	1.42037	1.0742	1.13844	1.18305	1.3722
	5.32854	4.35763	6.68519	8.00915	8.4374	7.49264	6.34521			1.19911	1.20803	1.24194	1.00104	1.11167	1.02959	1.02246
	4.61262	3.95227	6.06927	7.71167	8.29356	7.25727	6.29944			1.11524	1.1884	1.22944	0.967139	1.02959	0.947511	0.881489
	4.48513	3.83132	5.9252	7.62994	7.91435	6.87806	6.06407			0.949295	1.18483	1.19019	0.936805	0.954649	0.945727	0.845801
	4.18437	3.59922	5.67771	7.53841	7.6136	6.68192	6.06407			0.899333	0.992121	1.16878	0.893979	0.872567	0.769072	0.835094
	4.06342	3.56979	5.25289	7.53514	7.28016	6.45963	6.04446			0.888626	0.956433	1.11703	0.856507	0.802975	0.744091	0.724462
	4.05361	3.45538	4.92043	7.47303	7.17555	6.13926	5.5966			0.885057	0.952864	1.10454	0.838663	0.77621	0.610261	0.722678
	3.98169	3.33442	4.88719	7.39457	6.94671	6.08042	5.57699			0.874351	0.945727	1.03495	0.80476	0.729815	0.608477	0.654871
	3.96208	3.20366	4.82069	7.35534	6.89114	5.99542	5.42334			0.852938	0.851154	1.01532	0.726247	0.729815	0.599555	0.638812
	3.86401	3.17751	4.78006	6.99575	6.63616	5.80255	5.23047			0.84937	0.813682	0.863645	0.708403	0.724462	0.571005	0.610261
	3.86074	3.15463	4.71726	6.90422	6.27656	5.69467	5.17162			0.84937	0.795838	0.815466	0.628105	0.672715	0.538886	0.572789
	3.80517	3.03367	4.59166	6.85845	5.98235	5.60641	5.09317			0.845801	0.790485	0.740522	0.554945	0.665577	0.531748	0.571005
	3.63844	3.00752	4.5104	6.72769	5.9137	5.56391	4.93952			0.835094	0.767288	0.713756	0.513904	0.662009	0.524611	0.549592
	3.47499	2.98137	4.47715	6.54789	5.79928	5.43642	4.81203			0.83331	0.738737	0.704834	0.499629	0.635243	0.522826	0.54067
	3.38346	2.95195	4.39219	6.45636	5.6816	5.1324	4.81203			0.819035	0.710187	0.674499	0.485354	0.626321	0.497845	0.535317
	3.34423	2.81465	4.37741	6.34194	5.62275	5.12913	4.59627			0.813682	0.706618	0.672715	0.471079	0.615615	0.49606	0.533533
	3.30173	2.7983	4.27767	5.97908	5.5541	5.11605	4.40013			0.810113	0.674499	0.654871	0.469295	0.590633	0.49606	0.531748
	3.23308	2.77542	4.24443	5.97581	5.39065	5.06702	4.38705			0.808329	0.645949	0.637027	0.442529	0.583495	0.471079	0.526395
	3.18732	2.75253	4.17055	5.966	5.37757	4.9101	4.33148			0.785132	0.640596	0.635243	0.440744	0.581711	0.43896	0.522826
	3.17097	2.746	4.12991	5.83524	5.33835	4.74011	4.21706			0.763719	0.640596	0.622752	0.440744	0.578142	0.41041	0.515689
	3.14155	2.74273	3.94521	5.81236	5.24354	4.64858	4.14515			0.742306	0.620968	0.608477	0.433607	0.572789	0.401488	0.515689
	3.10232	2.67735	3.94521	5.78294	5.19451	4.63877	4.14188			0.733384	0.606693	0.606693	0.430038	0.565652	0.387213	0.51212
	3.08924	2.661	3.92674	5.76332	5.15855	4.6355	4.11572			0.733384	0.590633	0.597771	0.396135	0.55673	0.383644	0.508551
	3.05655	2.65119	3.827	5.6914	5.03106	4.61589	4.00785			0.729815	0.578142	0.587064	0.380075	0.537101	0.372937	0.478216
	3.04675	2.62177	3.81223	5.63256	5.02125	4.59954	3.9392			0.728031	0.572789	0.578142	0.351525	0.46751	0.367584	0.478216
	3.03367	2.61523	3.68663	5.53122	4.97221	4.593	3.92939			0.726247	0.56922	0.576358	0.34974	0.46751	0.351525	0.478216
	2.99444	2.60216	3.66816	5.50507	4.97221	4.56031	3.91304			0.71554	0.560298	0.572789	0.342603	0.451451	0.344387	0.469295
	2.97156	2.60216	3.65338	5.42988	4.89703	4.5407	3.78882			0.694128	0.54067	0.554945	0.340818	0.444313	0.344387	0.465726
	2.96175	2.56293	3.62383	5.37431	4.89049	4.45897	3.66133			0.694128	0.526395	0.537101	0.33725	0.444313	0.333681	0.451451
	2.93233	2.50736	3.53517	5.36123	4.85453	4.43609	3.64498			0.676284	0.524611	0.513904	0.328328	0.442529	0.326543	0.43896
	2.92252	2.50409	3.52779	5.34161	4.76299	4.42301	3.59922			0.672715	0.49606	0.501414	0.297993	0.433607	0.322975	0.435391
	2.89964	2.4812	3.49085	5.29585	4.71723	4.41975	3.58287			0.670931	0.488923	0.492492	0.296209	0.401488	0.312268	0.426469
	2.87676	2.46486	3.48346	5.29585	4.71396	4.39359	3.55672			0.645949	0.472863	0.481785	0.287287	0.390781	0.310484	0.419332
	2.86695	2.45505	3.38003	5.26316	4.68781	4.36417	3.5273			0.635243	0.456804	0.476432	0.280149	0.360447	0.308699	0.413978
	2.83426	2.42563	3.37264	5.25662	4.66165	4.23668	3.49134			0.628105	0.453235	0.474648	0.278365	0.358662	0.297993	0.405057
	2.82445	2.40928	3.36525	5.21412	4.53743	4.2138	3.47499			0.626321	0.444313	0.455019	0.278365	0.342603	0.281934	0.380075
	2.78849	2.39948	3.29137	5.1422	4.50147	4.17784	3.44557			0.626321	0.440744	0.453235	0.273012	0.324759	0.280149	0.378291
	2.78522	2.37659	3.28029	5.1422	4.4034	4.17457	3.42596			0.615615	0.440744	0.43896	0.26409	0.322975	0.262305	0.372937
	2.7558	2.36352	3.2729	5.06702	4.34783	4.15822	3.41615			0.606693	0.43896	0.435391	0.26409	0.322975	0.246246	0.353309
	2.75253	2.36025	3.26182	5.0049	4.33802	4.14515	3.40961			0.604908	0.428254	0.428254	0.246246	0.322975	0.235539	0.351525
	2.75253	2.2916	3.21749	4.98529	4.3086	4.12553	3.39653			0.601339	0.424685	0.428254	0.246246	0.32119	0.226618	0.333681
	2.74273	2.25564	3.151	4.97221	4.27918	4.09284	3.35731			0.597771	0.4229	0.419332	0.239108	0.32119	0.217696	0.322975
	2.68061	2.23929	3.12514	4.93952	4.27264	4.0863	3.3475			0.595986	0.4229	0.413978	0.235539	0.32119	0.201636	0.322975
	2.65119	2.23276	3.11775	4.87741	4.26937	4.05361	3.305			0.595986	0.392566	0.403272	0.226618	0.301562	0.19093	0.317621
	2.65119	2.23276	3.09928	4.81203	4.24975	4.05361	3.2625			0.595986	0.390781	0.396135	0.224833	0.297993	0.180223	0.310484
	2.6185	2.21968	3.04756	4.78261	4.22033	4.02746	3.25924			0.576358	0.388997	0.39435	0.214127	0.285502	0.178439	0.310484
	2.58254	2.21641	3.02909	4.74665	4.21706	4.02092	3.24943			0.567436	0.380075	0.383644	0.199852	0.283718	0.17487	0.306915
	2.57601	2.13795	3.01432	4.74011	4.20399	3.91958	3.24289			0.565652	0.371153	0.383644	0.19093	0.283718	0.171301	0.296209
	2.57274	2.11834	2.99954	4.73357	4.13534	3.90651	3.2102			0.565652	0.367584	0.376506	0.189145	0.281934	0.165948	0.289071
	2.55312	2.09546	2.96999	4.62896	4.05034	3.8967	3.19059			0.562083	0.360447	0.374722	0.173086	0.271227	0.142751	0.287287
	2.54985	2.09546	2.95521	4.59954	3.97516	3.89343	3.15789			0.553161	0.353309	0.358662	0.173086	0.26409	0.137398	0.278365
	2.54331	2.06603	2.93305	4.593	3.97516	3.85747	3.0304			0.551376	0.33725	0.346172	0.169517	0.258737	0.13026	0.26409
	2.52697	2.05296	2.8998	4.5832	3.97189	3.83786	3.02713			0.546023	0.33725	0.340818	0.165948	0.240893	0.124907	0.242677
	2.51716	2.04642	2.88503	4.57666	3.95554	3.81824	3.01079			0.538886	0.324759	0.339034	0.164164	0.240893	0.11777	0.237324
	2.49101	2.03008	2.86286	4.57012	3.9392	3.81497	2.97483			0.538886	0.319406	0.326543	0.155242	0.237324	0.108848	0.223049
	2.45832	2.01373	2.84809	4.53416	3.91631	3.78882	2.95521			0.528179	0.310484	0.324759	0.151673	0.217696	0.107063	0.21948
	2.44197	2.00719	2.84439	4.49493	3.91631	3.76267	2.89637			0.524611	0.301562	0.32119	0.137398	0.198067	0.105279	0.214127
	2.42236	2.00065	2.82223	4.48513	3.87708	3.72671	2.86695			0.522826	0.297993	0.315837	0.13026	0.189145	0.103495	0.212342
	2.40928	1.98431	2.80007	4.4459	3.81497	3.71363	2.8408			0.51212	0.296209	0.312268	0.121339	0.185577	0.0856507	0.205205
	2.40602	1.96796	2.78529	4.43936	3.77901	3.70382	2.83426			0.494276	0.294424	0.312268	0.121339	0.183792	0.0820819	0.199852
	2.39948	1.96143	2.7151	4.41321	3.77247	3.69402	2.83426			0.492492	0.287287	0.310484	0.108848	0.178439	0.0802975	0.194498
	2.39621	1.95162	2.70402	4.29879	3.7594	3.64825	2.83099			0.481785	0.285502	0.308699	0.107063	0.165948	0.0624536	0.192714
	2.37006	1.92547	2.68924	4.29225	3.72017	3.64171	2.82772			0.46751	0.285502	0.305131	0.0981414	0.164164	0.0588849	0.189145
	2.33737	1.87316	2.6523	4.28898	3.7169	3.60575	2.7983			0.465726	0.283718	0.299778	0.0927883	0.162379	0.0571005	0.182008
	2.32102	1.86662	2.60798	4.28571	3.68094	3.60575	2.79503			0.458588	0.242677	0.299778	0.0820819	0.151673	0.0446097	0.178439
	2.31448	1.86008	2.56365	4.23668	3.62864	3.50114	2.79176			0.435391	0.240893	0.297993	0.0749444	0.149889	0.0392566	0.176655
	2.31121	1.84701	2.56365	4.20399	3.59922	3.49134	2.78849			0.405057	0.240893	0.290856	0.0660224	0.14632	0.0303346	0.176655
	2.27525	1.83066	2.51932	4.19745	3.55345	3.48153	2.78849			0.388997	0.235539	0.287287	0.0606693	0.14632	0.0142751	0.171301
	2.26872	1.81432	2.50824	4.17784	3.55018	3.46845	2.77869			0.381859	0.208774	0.269443	0.0553161	0.140967		0.169517
	2.26545	1.81105	2.47499	4.1713	3.54364	3.46518	2.76234			0.371153	0.199852	0.255168	0.0553161	0.132045		0.165948
	2.23929	1.79797	2.4676	4.11246	3.53057	3.45865	2.746			0.367584	0.19093	0.251599	0.0499629	0.121339		0.162379
	2.2066	1.78817	2.46391	4.10592	3.52076	3.45538	2.74273			0.360447	0.189145	0.249815	0.0285502	0.110632		0.158811
	2.20007	1.77509	2.43066	4.10265	3.50441	3.44884	2.73292			0.358662	0.187361	0.246246	0.00713756	0.10171		0.155242
	2.20007	1.74567	2.42697	4.05034	3.4848	3.43249	2.71984			0.356878	0.176655	0.240893	0.00178439	0.0963571		0.126692
	2.19026	1.73586	2.41589	4.05034	3.47826	3.41615	2.68061			0.355094	0.17487	0.239108		0.0945727		0.110632
	2.18372	1.72932	2.39003	4.05034	3.47499	3.41288	2.68061			0.351525	0.169517	0.230186		0.0927883		0.107063
	2.18045	1.70971	2.39003	4.04707	3.45538	3.39653	2.68061			0.331897	0.164164	0.21948		0.0874351		0.103495
	2.17718	1.70971	2.38634	4.02419	3.45211	3.39327	2.67735			0.331897	0.164164	0.215911		0.07316		0.10171
	2.17718	1.69009	2.3494	4.00785	3.43903	3.38019	2.67735			0.326543	0.162379	0.212342		0.0695912		0.0963571
	2.16411	1.69009	2.32723	3.98169	3.42923	3.37038	2.61523			0.324759	0.157026	0.212342		0.0678068		0.0910039
	2.14449	1.67375	2.32354	3.95227	3.41615	3.36058	2.61196			0.324759	0.149889	0.206989		0.0606693		0.0820819
	2.12815	1.66394	2.31984	3.91304	3.39653	3.35077	2.6087			0.324759	0.14632	0.201636		0.0517473		0.0802975
	2.12488	1.65414	2.30876	3.90651	3.37692	3.33769	2.60216			0.324759	0.144536	0.198067		0.041041		0.0802975
	2.11834	1.65087	2.30876	3.90324	3.37365	3.32135	2.59235			0.322975	0.144536	0.19093		0.0374722		0.0785132
	2.11834	1.6476	2.30507	3.88362	3.35731	3.29846	2.57274			0.303346	0.142751	0.187361		0.0231971		0.0749444
	2.11834	1.6476	2.29398	3.88035	3.28212	3.22654	2.54985			0.296209	0.140967	0.182008		0.0178439		0.0695912
	2.08565	1.62798	2.29029	3.85747	3.27231	3.22001	2.54658			0.290856	0.124907	0.180223				0.0678068
	2.06603	1.62798	2.27551	3.83786	3.25924	3.19385	2.54005			0.287287	0.107063	0.171301				0.0588849
	2.05623	1.61818	2.27551	3.81497	3.24943	3.18732	2.5237			0.278365	0.107063	0.167733				0.0571005
	2.05623	1.61491	2.27551	3.77901	3.24616	3.16116	2.51716			0.267658	0.0999258	0.157026				0.0553161
	2.04642	1.60837	2.25335	3.76267	3.23635	3.15789	2.50736			0.256952	0.0945727	0.153458				0.0517473
	2.03661	1.6051	2.24596	3.75286	3.21347	3.14482	2.50736			0.255168	0.0856507	0.149889				0.0481785
	2.03008	1.6051	2.23488	3.74959	3.19712	3.12194	2.50409			0.24803	0.0838663	0.14632				0.0463941
	2.02027	1.59202	2.23119	3.70709	3.17097	3.11867	2.49755			0.246246	0.0785132	0.142751				0.032119
	2.017	1.58875	2.2238	3.6646	3.17097	3.08271	2.49755			0.240893	0.0749444	0.142751				0.0249815
	2.01046	1.57895	2.20902	3.65806	3.13501	3.06636	2.49101			0.233755	0.0695912	0.140967				0.0231971
	2.01046	1.56914	2.20533	3.64171	3.06309	3.05329	2.49101			0.228402	0.0695912	0.139182				0.0178439
	1.99412	1.5626	2.18686	3.63844	3.04021	3.0304	2.47793			0.226618	0.0463941	0.126692				0.00713756
	1.98431	1.55606	2.18686	3.59595	3.00752	3.02713	2.4714			0.21948	0.041041	0.119554				0.00356878
	1.98104	1.55606	2.18316	3.58287	3.00425	3.01406	2.46813			0.217696	0.0356878	0.119554				0.00178439
	1.97777	1.54953	2.17947	3.55999	2.99771	2.99771	2.45832			0.212342	0.0249815	0.11777
	1.96796	1.54626	2.161	3.55018	2.97156	2.99771	2.45178			0.198067	0.0231971	0.110632
	1.96469	1.54626	2.14622	3.54691	2.96175	2.97156	2.43871			0.196283	0.0196283	0.0927883
	1.96469	1.53972	2.13145	3.54037	2.92906	2.95195	2.43217			0.19093	0.0160595	0.0927883
	1.95489	1.52664	2.12406	3.53057	2.90945	2.94868	2.43217			0.17487	0.0142751	0.0892195
	1.95489	1.51684	2.11298	3.52076	2.90618	2.94868	2.41582			0.173086	0.00713756	0.0838663
	1.95489	1.5103	2.0982	3.51749	2.90291	2.94868	2.40602			0.173086		0.0820819
	1.94835	1.5103	2.08712	3.50114	2.87349	2.94214	2.39948			0.169517		0.0749444
	1.94508	1.50376	2.06496	3.49461	2.87022	2.94214	2.39621			0.164164		0.07316
	1.94508	1.48741	2.05018	3.4848	2.86695	2.9356	2.39294			0.164164		0.0713756
	1.932	1.48088	2.0391	3.46518	2.86368	2.9356	2.38967			0.160595		0.0695912
	1.932	1.47434	2.0391	3.42596	2.86041	2.93233	2.36025			0.153458		0.0678068
	1.92547	1.47107	2.02063	3.40961	2.85714	2.92579	2.35371			0.148104		0.0624536
	1.91239	1.44165	2.01324	3.39327	2.85714	2.90618	2.35371			0.148104		0.0606693
	1.90585	1.43838	1.99846	3.39	2.83753	2.87349	2.3439			0.148104		0.0588849
	1.89931	1.43184	1.99108	3.38673	2.82772	2.87022	2.33083			0.14632		0.0517473
	1.89931	1.43184	1.99108	3.36711	2.82445	2.86041	2.32429			0.133829		0.0499629
	1.89604	1.42857	1.97999	3.36384	2.80157	2.8506	2.31448			0.121339		0.032119
	1.87316	1.4155	1.97261	3.33769	2.7983	2.82772	2.30794			0.0981414		0.0249815
	1.86662	1.39588	1.95783	3.32788	2.78849	2.82445	2.30794			0.0945727		0.0249815
	1.86335	1.39588	1.93567	3.30827	2.78522	2.80811	2.30141			0.0838663		0.0249815
	1.85682	1.39588	1.93197	3.30173	2.76888	2.80157	2.29814			0.0838663		0.0214127
	1.85355	1.38934	1.92458	3.29193	2.76234	2.77869	2.29487			0.0749444		0.0196283
	1.85028	1.38607	1.90611	3.28539	2.75253	2.77869	2.2916			0.0553161		0.0196283
	1.85028	1.3828	1.90242	3.25924	2.74926	2.77542	2.27852			0.0428254		0.0142751
	1.84047	1.37627	1.88764	3.25924	2.72638	2.77542	2.27198			0.0303346		0.0107063
	1.83066	1.373	1.88764	3.24289	2.71657	2.76234	2.27198			0.0285502		0.00892195
	1.81759	1.373	1.88395	3.23635	2.71331	2.74926	2.26872			0.0178439		0.00356878
	1.81759	1.36973	1.88395	3.22654	2.68715	2.74273	2.26218
	1.80451	1.35665	1.86917	3.22328	2.68061	2.73619	2.25237
	1.79797	1.34031	1.86178	3.20039	2.66754	2.71657	2.24256
	1.7947	1.34031	1.8544	3.19712	2.661	2.71004	2.23929
	1.78163	1.33377	1.80268	3.19712	2.65773	2.70023	2.23602
	1.76528	1.32723	1.79899	3.18732	2.65446	2.69042	2.21968
	1.75874	1.32396	1.7879	3.18732	2.62831	2.69042	2.21641
	1.75548	1.32396	1.78421	3.15789	2.62831	2.67735	2.21641
	1.73586	1.32069	1.78421	3.15136	2.61523	2.67408	2.21314
	1.72932	1.31742	1.77313	3.14482	2.59562	2.661	2.21314
	1.72605	1.31415	1.76943	3.12194	2.58908	2.65446	2.20987
	1.71952	1.31415	1.76943	3.11867	2.57927	2.64466	2.15757
	1.71625	1.31089	1.76574	3.1154	2.56947	2.64466	2.14776
	1.71625	1.30762	1.75835	3.10886	2.54658	2.6185	2.13468
	1.70644	1.30435	1.75835	3.10232	2.53351	2.6087	2.13142
	1.69663	1.288	1.75096	3.09905	2.52697	2.60543	2.12488
	1.67375	1.28146	1.74727	3.09578	2.52043	2.59562	2.11834
	1.67048	1.2782	1.72511	3.09251	2.51389	2.58908	2.11507
	1.66067	1.27166	1.71772	3.08271	2.50409	2.58254	2.11507
	1.65087	1.25531	1.71402	3.07944	2.49428	2.53024	2.1118
	1.6476	1.25204	1.71033	3.0729	2.4812	2.52697	2.1118
	1.6476	1.25204	1.70664	3.0729	2.47466	2.51389	2.10853
	1.63125	1.24551	1.70664	3.04675	2.45832	2.51389	2.10526
	1.62471	1.24551	1.69186	3.03367	2.45505	2.48774	2.10199
	1.61491	1.2357	1.69186	3.02059	2.44524	2.4812	2.09873
	1.60183	1.23243	1.68817	3.01406	2.42563	2.46813	2.08892
	1.60183	1.22262	1.68447	3.00425	2.41255	2.46486	2.07911
	1.59529	1.21281	1.67708	3.00098	2.40928	2.43544	2.05296
	1.59529	1.20628	1.64753	2.99444	2.39621	2.43217	2.04969
	1.59202	1.20628	1.62906	2.98464	2.39621	2.42236	2.04969
	1.58549	1.19647	1.62537	2.97483	2.39294	2.42236	2.03988
	1.58549	1.1932	1.62537	2.95195	2.3864	2.41255	2.03661
	1.58549	1.18339	1.62537	2.94214	2.38313	2.41255	2.03661
	1.58222	1.18012	1.61798	2.9356	2.37659	2.41255	2.03334
	1.57895	1.17686	1.61798	2.92579	2.37659	2.40275	2.017
	1.57568	1.17359	1.59951	2.90945	2.37332	2.39294	2.01373
	1.57568	1.17359	1.59212	2.90618	2.36679	2.3864	2.01373
	1.56587	1.16378	1.58473	2.8931	2.36679	2.35698	2.01373
	1.5626	1.16378	1.58104	2.88656	2.36679	2.35371	2.00719
	1.55933	1.16378	1.57365	2.8833	2.36352	2.35044	1.99738
	1.55933	1.16051	1.56996	2.85387	2.35698	2.34063	1.99738
	1.54626	1.14743	1.55518	2.8506	2.34063	2.3341	1.99738
	1.53645	1.14743	1.54779	2.84407	2.33083	2.33083	1.98758
	1.52991	1.14416	1.54779	2.83426	2.31775	2.33083	1.98104
	1.52991	1.14416	1.54779	2.83099	2.30794	2.32756	1.97123
	1.5103	1.14416	1.5441	2.82118	2.30794	2.31775	1.97123
	1.5103	1.13763	1.53302	2.7983	2.30141	2.31448	1.96796
	1.50703	1.13436	1.52932	2.78849	2.2916	2.29814	1.96469
	1.50376	1.13436	1.51824	2.77542	2.28833	2.29487	1.96143
	1.48415	1.12782	1.51824	2.7558	2.26872	2.28833	1.95816
	1.48088	1.12455	1.51455	2.74273	2.26872	2.27198	1.95489
	1.48088	1.10494	1.51455	2.73619	2.26218	2.24583	1.95162
	1.47761	1.10167	1.50716	2.72965	2.25891	2.24583	1.95162
	1.46453	1.0984	1.49608	2.72638	2.25564	2.22949	1.95162
	1.46126	1.09513	1.48869	2.72638	2.24256	2.22949	1.94508
	1.45799	1.09513	1.4813	2.72638	2.23929	2.21641	1.93527
	1.45799	1.07551	1.47761	2.71657	2.23602	2.21314	1.93527
	1.45799	1.07551	1.47391	2.71657	2.23276	2.21314	1.92873
	1.45145	1.07225	1.47391	2.68061	2.22949	2.20333	1.92547
	1.44819	1.06244	1.47391	2.66427	2.22295	2.20007	1.9222
	1.43838	1.06244	1.47022	2.661	2.21968	2.17718	1.9222
	1.4253	1.06244	1.46283	2.65119	2.21968	2.17064	1.91893
	1.42203	1.05263	1.43328	2.63158	2.21641	2.16411	1.91893
	1.41223	1.04936	1.40742	2.62831	2.21641	2.16084	1.91893
	1.40569	1.04609	1.40373	2.58908	2.21641	2.15757	1.91566
	1.40569	1.04282	1.39634	2.58254	2.19353	2.1543	1.90258
	1.39915	1.03629	1.39264	2.57601	2.18372	2.14449	1.89604
	1.39588	1.03302	1.37417	2.5662	2.18045	2.13142	1.89604
	1.3828	1.02975	1.37417	2.56293	2.17718	2.12488	1.88951
	1.35992	1.02648	1.36679	2.56293	2.17064	2.12161	1.87643
	1.35665	1.02648	1.36679	2.56293	2.16411	2.12161	1.87643
	1.35011	1.00686	1.36309	2.55966	2.15757	2.11834	1.86989
	1.35011	1.0036	1.36309	2.55312	2.14776	2.11507	1.86662
	1.3305	1.00033	1.3557	2.54985	2.14122	2.11507	1.86335
	1.32723	1.00033	1.34832	2.52697	2.12161	2.1118	1.85682
	1.32723	1.00033	1.34832	2.51389	2.11834	2.09546	1.85355
	1.30762	0.997058	1.34832	2.51062	2.10853	2.09546	1.85355
	1.30435	0.993789	1.33723	2.50082	2.09219	2.08892	1.85028
	1.30435	0.987251	1.31507	2.48774	2.07584	2.08565	1.85028
	1.29781	0.983982	1.30399	2.48447	2.06277	2.07257	1.8372
	1.29781	0.980713	1.30399	2.47466	2.0595	2.06277	1.8372
	1.29454	0.967636	1.30029	2.47466	2.05623	2.04315	1.83066
	1.29454	0.961098	1.2966	2.46813	2.05296	2.02354	1.82413
	1.29127	0.951291	1.28552	2.46486	2.04315	2.02027	1.82413
	1.288	0.951291	1.27813	2.45178	2.03008	2.017	1.82086
	1.288	0.944753	1.27813	2.44851	2.02354	2.01046	1.80778
	1.288	0.944753	1.26335	2.43544	2.02354	2.00719	1.80778
	1.288	0.944753	1.25966	2.43217	2.02027	2.00719	1.80124
	1.27166	0.934946	1.25597	2.4289	2.00392	1.99412	1.78817
	1.26512	0.925139	1.25597	2.41255	2.00392	1.99412	1.7849
	1.26185	0.925139	1.25227	2.40602	1.99085	1.99085	1.77509
	1.25858	0.92187	1.2375	2.40275	1.98431	1.99085	1.77182
	1.24877	0.92187	1.2338	2.40275	1.98431	1.97123	1.76528
	1.24877	0.918601	1.2338	2.40275	1.98104	1.96469	1.76528
	1.24224	0.915332	1.22272	2.39621	1.97777	1.95489	1.76201
	1.23897	0.912063	1.21164	2.39621	1.97123	1.94508	1.75221
	1.23897	0.908794	1.20425	2.39621	1.95162	1.94508	1.75221
	1.23897	0.908794	1.20056	2.39294	1.93527	1.92547	1.74567
	1.2357	0.905525	1.20056	2.38967	1.93527	1.92547	1.7424
	1.22916	0.905525	1.20056	2.37986	1.932	1.91893	1.73586
	1.22589	0.902256	1.19686	2.37986	1.9222	1.8797	1.73259
	1.22589	0.898987	1.19317	2.37332	1.91893	1.8797	1.72279
	1.22262	0.895718	1.1747	2.37332	1.90258	1.87643	1.69336
	1.21608	0.892449	1.171	2.36679	1.89931	1.87643	1.68683
	1.21281	0.889179	1.16731	2.36352	1.88951	1.87316	1.68029
	1.21281	0.88591	1.15623	2.35371	1.88624	1.86335	1.68029
	1.19974	0.88591	1.15253	2.35044	1.88297	1.85682	1.67702
	1.19647	0.88591	1.15253	2.34063	1.8797	1.8372	1.66067
	1.1932	0.882641	1.13776	2.34063	1.87643	1.83066	1.6574
	1.18666	0.879372	1.13037	2.3341	1.86335	1.81759	1.65414
	1.18666	0.876103	1.13037	2.3341	1.85355	1.81105	1.6476
	1.18666	0.866296	1.13037	2.33083	1.85028	1.79144	1.64433
	1.18339	0.863027	1.12668	2.33083	1.84374	1.79144	1.63452
	1.18012	0.863027	1.12668	2.31448	1.84047	1.78163	1.62471
	1.17032	0.849951	1.11929	2.30794	1.8372	1.78163	1.62144
	1.17032	0.843413	1.11929	2.29487	1.8372	1.78163	1.61818
	1.16705	0.840144	1.10451	2.2916	1.8372	1.76201	1.61818
	1.15724	0.836875	1.08974	2.28833	1.83393	1.75548	1.6051
	1.15397	0.830337	1.08974	2.27852	1.83393	1.74894	1.6051
	1.14743	0.830337	1.08235	2.27198	1.80451	1.72932	1.59529
	1.14743	0.830337	1.07496	2.26872	1.79797	1.72605	1.59202
	1.14416	0.827068	1.07496	2.25564	1.77509	1.71298	1.57895
	1.1409	0.823799	1.07127	2.25564	1.76528	1.71298	1.57241
	1.1409	0.817261	1.06388	2.25237	1.76528	1.70644	1.5626
	1.13436	0.813992	1.06018	2.25237	1.76201	1.70317	1.55933
	1.12782	0.813992	1.05649	2.23602	1.76201	1.6999	1.53972
	1.12782	0.813992	1.03802	2.22295	1.75874	1.6999	1.53645
	1.12455	0.797646	1.03802	2.22295	1.75874	1.68683	1.53645
	1.12128	0.794377	1.03432	2.20333	1.75548	1.68029	1.52664
	1.12128	0.78457	1.03063	2.20007	1.75548	1.66394	1.51684
	1.11801	0.778032	1.01955	2.20007	1.75221	1.66394	1.51684
	1.11474	0.778032	1.00847	2.19353	1.75221	1.65414	1.51684
	1.11474	0.774763	1.00847	2.19026	1.73259	1.63452	1.51357
	1.10167	0.771494	1.00477	2.18045	1.72932	1.63125	1.51357
	1.0984	0.768225	1.00108	2.18045	1.72605	1.62471	1.5103
	1.0984	0.761687	1.00108	2.17391	1.71298	1.61818	1.5103
	1.09513	0.758418	1.00108	2.16084	1.70971	1.61491	1.5103
	1.09186	0.758418	0.993691	2.15103	1.6999	1.60837	1.50703
	1.08859	0.758418	0.993691	2.15103	1.6999	1.6051	1.50703
	1.08532	0.758418	0.993691	2.15103	1.68683	1.59856	1.50049
	1.08205	0.75188	0.989997	2.14449	1.68356	1.57241	1.50049
	1.07878	0.748611	0.986303	2.13795	1.67048	1.56914	1.49395
	1.07878	0.738804	0.982609	2.13795	1.66394	1.5626	1.47434
	1.07225	0.732265	0.978915	2.13468	1.66067	1.55933	1.45799
	1.06898	0.732265	0.971527	2.12815	1.6574	1.5528	1.45799
	1.06898	0.725727	0.967833	2.11834	1.65087	1.54626	1.44819
	1.06571	0.722458	0.964139	2.11507	1.65087	1.54626	1.44492
	1.06244	0.722458	0.956751	2.10853	1.6476	1.53972	1.44165
	1.06244	0.719189	0.949363	2.10526	1.64106	1.53645	1.43838
	1.04282	0.719189	0.949363	2.10526	1.63125	1.53645	1.43511
	1.03956	0.71592	0.945669	2.09546	1.62144	1.53318	1.4155
	1.02648	0.712651	0.941975	2.08892	1.61818	1.52337	1.40242
	1.02321	0.712651	0.93828	2.07257	1.61491	1.51357	1.39915
	1.01994	0.702844	0.93828	2.07257	1.61164	1.51357	1.39588
	1.01667	0.699575	0.93828	2.0693	1.60837	1.50703	1.38607
	1.01667	0.696306	0.934586	2.06277	1.6051	1.48741	1.37954
	1.0134	0.689768	0.930892	2.05623	1.58549	1.47107	1.37627
	1.0134	0.689768	0.930892	2.05623	1.58549	1.45799	1.373
	1.01013	0.686499	0.916116	2.05296	1.58222	1.45799	1.36319
	1.01013	0.686499	0.916116	2.04642	1.58222	1.45145	1.36319
	1.00686	0.68323	0.916116	2.03661	1.56587	1.44492	1.35992
	0.997058	0.679961	0.916116	2.03334	1.55606	1.43511	1.35665
	0.987251	0.679961	0.916116	2.03008	1.55606	1.43184	1.34685
	0.983982	0.673423	0.912422	2.03008	1.5528	1.4155	1.34358
	0.977444	0.663616	0.908728	2.017	1.54626	1.41223	1.34358
	0.974175	0.663616	0.905034	2.01373	1.54626	1.40896	1.33704
	0.970906	0.657077	0.90134	2.01373	1.53972	1.39261	1.32069
	0.970906	0.657077	0.897646	1.99738	1.50703	1.39261	1.32069
	0.967636	0.657077	0.890258	1.99085	1.50376	1.38934	1.32069
	0.961098	0.653808	0.88287	1.98758	1.50376	1.38934	1.31742
	0.957829	0.64727	0.871788	1.98104	1.50049	1.38607	1.31415
	0.95456	0.64727	0.868094	1.97777	1.49722	1.38607	1.31415
	0.95456	0.644001	0.8644	1.9745	1.49722	1.373	1.31089
	0.95456	0.640732	0.860706	1.97123	1.49722	1.373	1.30762
	0.95456	0.640732	0.857012	1.96796	1.49395	1.373	1.30762
	0.951291	0.637463	0.849624	1.96796	1.48741	1.36646	1.30435
	0.941484	0.634194	0.849624	1.95162	1.48415	1.36319	1.30435
	0.938215	0.634194	0.84593	1.94835	1.48415	1.35665	1.29781
	0.938215	0.630925	0.842236	1.94835	1.48415	1.35665	1.29781
	0.931677	0.621118	0.842236	1.94835	1.48415	1.34685	1.29454
	0.931677	0.617849	0.838542	1.94508	1.48415	1.34358	1.28473
	0.928408	0.617849	0.834848	1.93854	1.47761	1.34358	1.27493
	0.928408	0.617849	0.831154	1.93527	1.47434	1.34031	1.27493
	0.925139	0.61458	0.82746	1.92547	1.47107	1.34031	1.27166
	0.918601	0.611311	0.823766	1.91239	1.47107	1.33704	1.27166
	0.912063	0.608042	0.816378	1.90912	1.4678	1.33377	1.26839
	0.912063	0.608042	0.812684	1.89931	1.4678	1.3305	1.26185
	0.905525	0.608042	0.805296	1.89604	1.45799	1.32723	1.25858
	0.898987	0.608042	0.805296	1.89278	1.45145	1.31742	1.25858
	0.895718	0.604773	0.801602	1.88624	1.44492	1.31415	1.25858
	0.895718	0.598235	0.794214	1.88624	1.43511	1.30762	1.25531
	0.892449	0.598235	0.79052	1.8797	1.43184	1.30435	1.25204
	0.892449	0.598235	0.79052	1.86335	1.4253	1.30435	1.25204
	0.889179	0.594966	0.779438	1.86335	1.4155	1.29781	1.24551
	0.88591	0.594966	0.775744	1.86335	1.41223	1.29454	1.24224
	0.876103	0.588428	0.775744	1.86008	1.40896	1.28473	1.23897
	0.872834	0.58189	0.768356	1.84701	1.39915	1.25858	1.2357
	0.869565	0.58189	0.764662	1.81759	1.38934	1.25858	1.2357
	0.869565	0.57862	0.75358	1.81432	1.38607	1.25858	1.2357
	0.863027	0.57862	0.75358	1.81432	1.373	1.25531	1.22589
	0.856489	0.57862	0.742498	1.81105	1.373	1.25204	1.22589
	0.856489	0.575351	0.738804	1.80451	1.35992	1.24551	1.22262
	0.856489	0.572082	0.716639	1.79797	1.35338	1.23897	1.22262
	0.85322	0.572082	0.716639	1.79144	1.35338	1.23897	1.22262
	0.849951	0.565544	0.712945	1.79144	1.35011	1.2357	1.20955
	0.849951	0.565544	0.712945	1.77509	1.34685	1.22916	1.20955
	0.843413	0.562275	0.709251	1.77509	1.33704	1.22916	1.20628
	0.840144	0.559006	0.709251	1.76855	1.32396	1.21608	1.20301
	0.840144	0.559006	0.709251	1.76855	1.32069	1.21281	1.19647
	0.823799	0.555737	0.705557	1.76528	1.31089	1.20301	1.1932
	0.82053	0.552468	0.701863	1.76201	1.30762	1.18993	1.18993
	0.817261	0.552468	0.701863	1.75874	1.30108	1.18666	1.18666
	0.810722	0.54593	0.694475	1.74894	1.29781	1.18666	1.18339
	0.810722	0.54593	0.694475	1.74567	1.29781	1.17032	1.18012
	0.807453	0.54593	0.690781	1.7424	1.29781	1.16705	1.18012
	0.804184	0.542661	0.668617	1.73913	1.29454	1.16378	1.17686
	0.797646	0.532854	0.668617	1.72605	1.288	1.1507	1.17359
	0.794377	0.532854	0.664923	1.72605	1.28473	1.14416	1.17032
	0.794377	0.529585	0.664923	1.71952	1.28146	1.14416	1.17032
	0.787839	0.526316	0.661229	1.71625	1.28146	1.14416	1.16378
	0.781301	0.526316	0.650147	1.71298	1.28146	1.14416	1.16378
	0.781301	0.523047	0.635371	1.70644	1.2782	1.13436	1.16378
	0.778032	0.519778	0.635371	1.6999	1.2782	1.13109	1.15397
	0.774763	0.519778	0.635371	1.69663	1.2782	1.13109	1.1507
	0.771494	0.516509	0.631677	1.69663	1.27493	1.13109	1.14743
	0.771494	0.51324	0.627983	1.68029	1.27493	1.12782	1.1409
	0.764956	0.509971	0.627983	1.67702	1.27493	1.12128	1.1409
	0.761687	0.509971	0.624289	1.67702	1.27166	1.11801	1.13763
	0.761687	0.506702	0.609513	1.67702	1.26839	1.11474	1.13109
	0.761687	0.503432	0.605819	1.67375	1.26512	1.11147	1.12455
	0.758418	0.490356	0.605819	1.67375	1.26512	1.07878	1.12455
	0.758418	0.490356	0.598431	1.67375	1.26512	1.07225	1.11801
	0.748611	0.487087	0.591043	1.67375	1.26185	1.06898	1.11801
	0.748611	0.483818	0.579961	1.66394	1.25204	1.06571	1.11474
	0.748611	0.480549	0.576267	1.66067	1.24551	1.05917	1.11147
	0.745342	0.480549	0.576267	1.6574	1.24551	1.05263	1.10821
	0.745342	0.480549	0.568879	1.65414	1.24551	1.04936	1.10494
	0.745342	0.47728	0.565185	1.64433	1.24224	1.04936	1.0984
	0.742073	0.47728	0.561491	1.62471	1.24224	1.03629	1.09186
	0.742073	0.467473	0.557797	1.62471	1.2357	1.03302	1.09186
	0.738804	0.464204	0.554103	1.61818	1.22589	1.03302	1.08859
	0.738804	0.464204	0.550409	1.61491	1.22262	1.02975	1.08859
	0.732265	0.460935	0.546715	1.61491	1.22262	1.02975	1.08532
	0.732265	0.454397	0.546715	1.61164	1.21935	1.02648	1.08532
	0.728996	0.454397	0.543021	1.60837	1.21608	1.00033	1.08205
	0.725727	0.451128	0.543021	1.60837	1.21281	0.997058	1.07551
	0.725727	0.44459	0.539327	1.59529	1.19974	0.99052	1.07225
	0.725727	0.438052	0.535633	1.58549	1.19974	0.987251	1.06898
	0.722458	0.438052	0.535633	1.58549	1.19647	0.983982	1.06571
	0.722458	0.438052	0.520856	1.57568	1.1932	0.970906	1.06571
	0.722458	0.434783	0.517162	1.56914	1.1932	0.970906	1.06571
	0.719189	0.434783	0.513468	1.56587	1.18339	0.967636	1.05263
	0.719189	0.431514	0.509774	1.56587	1.18339	0.967636	1.04936
	0.71592	0.431514	0.509774	1.5626	1.17686	0.961098	1.04282
	0.71592	0.424975	0.509774	1.55933	1.17359	0.957829	1.03956
	0.712651	0.418437	0.509774	1.55606	1.17032	0.951291	1.03302
	0.706113	0.415168	0.50608	1.5528	1.15724	0.948022	1.03302
	0.702844	0.415168	0.498692	1.54953	1.15724	0.938215	1.02975
	0.702844	0.415168	0.498692	1.54953	1.15397	0.934946	1.02975
	0.699575	0.411899	0.494998	1.54626	1.15397	0.925139	1.02648
	0.699575	0.405361	0.491304	1.52991	1.1507	0.92187	1.02648
	0.696306	0.402092	0.48761	1.52664	1.1507	0.918601	1.02321
	0.696306	0.402092	0.48761	1.52664	1.14743	0.918601	1.02321
	0.693037	0.398823	0.48761	1.51357	1.14416	0.915332	1.02321
	0.689768	0.398823	0.483916	1.50703	1.1409	0.905525	1.02321
	0.686499	0.395554	0.483916	1.50703	1.1409	0.905525	1.02321
	0.686499	0.382478	0.480222	1.50376	1.1409	0.902256	1.01994
	0.68323	0.382478	0.480222	1.50376	1.1409	0.902256	1.01994
	0.68323	0.382478	0.480222	1.49722	1.13763	0.895718	1.01994
	0.68323	0.379209	0.480222	1.47761	1.13436	0.892449	1.01667
	0.670154	0.379209	0.476528	1.4678	1.13436	0.889179	1.0134
	0.670154	0.37594	0.46914	1.46453	1.12782	0.879372	1.01013
	0.670154	0.372671	0.46914	1.46453	1.12128	0.879372	1.0036
	0.666885	0.372671	0.465446	1.45472	1.11474	0.876103	1.0036
	0.663616	0.369402	0.461752	1.44819	1.11474	0.869565	1.0036
	0.660347	0.359595	0.45067	1.44492	1.11147	0.869565	1.00033
	0.657077	0.359595	0.45067	1.44165	1.09513	0.869565	0.993789
	0.650539	0.356326	0.443282	1.43838	1.09186	0.866296	0.993789
	0.64727	0.356326	0.443282	1.43838	1.09186	0.846682	0.99052
	0.644001	0.356326	0.439588	1.43511	1.07878	0.843413	0.987251
	0.637463	0.349788	0.435894	1.4253	1.06571	0.833606	0.987251
	0.634194	0.349788	0.428506	1.42203	1.06571	0.830337	0.987251
	0.634194	0.346518	0.424812	1.42203	1.06244	0.827068	0.987251
	0.634194	0.343249	0.417424	1.41876	1.05917	0.823799	0.980713
	0.634194	0.343249	0.417424	1.41876	1.05917	0.82053	0.980713
	0.634194	0.336711	0.41373	1.41223	1.0559	0.813992	0.977444
	0.630925	0.336711	0.402648	1.39261	1.05263	0.810722	0.974175
	0.630925	0.333442	0.398954	1.38607	1.04609	0.804184	0.970906
	0.630925	0.323635	0.391566	1.36319	1.04282	0.800915	0.967636
	0.630925	0.323635	0.387872	1.35338	1.03629	0.800915	0.957829
	0.627656	0.323635	0.387872	1.35011	1.03302	0.800915	0.95456
	0.624387	0.313828	0.387872	1.34358	1.02648	0.794377	0.95456
	0.621118	0.313828	0.384178	1.33704	1.01994	0.791108	0.948022
	0.617849	0.313828	0.380484	1.33704	1.01667	0.787839	0.948022
	0.617849	0.310559	0.380484	1.33704	1.0134	0.781301	0.944753
	0.617849	0.30729	0.37679	1.33377	1.0134	0.781301	0.944753
	0.617849	0.30729	0.373096	1.3305	1.01013	0.781301	0.944753
	0.617849	0.304021	0.373096	1.32723	0.99052	0.771494	0.944753
	0.611311	0.294214	0.369402	1.32396	0.974175	0.768225	0.944753
	0.611311	0.290945	0.369402	1.32396	0.974175	0.768225	0.931677
	0.611311	0.281138	0.362014	1.32069	0.974175	0.761687	0.928408
	0.611311	0.281138	0.35832	1.32069	0.961098	0.761687	0.92187
	0.608042	0.277869	0.35832	1.32069	0.95456	0.755149	0.918601
	0.608042	0.271331	0.350932	1.32069	0.951291	0.755149	0.918601
	0.598235	0.268061	0.347238	1.31415	0.951291	0.755149	0.915332
	0.598235	0.268061	0.343544	1.31415	0.941484	0.75188	0.912063
	0.598235	0.268061	0.336156	1.31089	0.934946	0.745342	0.912063
	0.594966	0.268061	0.336156	1.30762	0.928408	0.742073	0.912063
	0.588428	0.264792	0.332462	1.30108	0.908794	0.738804	0.908794
	0.588428	0.264792	0.325074	1.29454	0.905525	0.735534	0.905525
	0.58189	0.264792	0.317686	1.29127	0.898987	0.728996	0.902256
	0.58189	0.254985	0.310297	1.28473	0.889179	0.722458	0.898987
	0.58189	0.254985	0.310297	1.27166	0.879372	0.71592	0.895718
	0.58189	0.254985	0.295521	1.26185	0.876103	0.71592	0.879372
	0.57862	0.254985	0.291827	1.26185	0.876103	0.706113	0.869565
	0.568813	0.251716	0.288133	1.24224	0.872834	0.706113	0.866296
	0.565544	0.248447	0.280745	1.23897	0.866296	0.702844	0.849951
	0.565544	0.245178	0.277051	1.23243	0.866296	0.702844	0.849951
	0.562275	0.245178	0.277051	1.22262	0.856489	0.699575	0.846682
	0.562275	0.245178	0.273357	1.21608	0.856489	0.699575	0.843413
	0.562275	0.245178	0.273357	1.20301	0.849951	0.693037	0.836875
	0.559006	0.241909	0.273357	1.19974	0.843413	0.689768	0.833606
	0.549199	0.241909	0.273357	1.19974	0.840144	0.689768	0.833606
	0.539392	0.235371	0.269663	1.19647	0.836875	0.679961	0.827068
	0.536123	0.228833	0.265969	1.18339	0.836875	0.679961	0.827068
	0.526316	0.228833	0.262275	1.18012	0.830337	0.679961	0.823799
	0.526316	0.225564	0.258581	1.18012	0.823799	0.676692	0.823799
	0.509971	0.219026	0.254887	1.17359	0.82053	0.673423	0.823799
	0.509971	0.215757	0.254887	1.17032	0.813992	0.673423	0.823799
	0.506702	0.212488	0.254887	1.17032	0.813992	0.657077	0.82053
	0.506702	0.212488	0.251193	1.17032	0.810722	0.657077	0.82053
	0.503432	0.209219	0.247499	1.16705	0.800915	0.657077	0.82053
	0.503432	0.20595	0.247499	1.15397	0.794377	0.657077	0.807453
	0.500163	0.20595	0.247499	1.15397	0.791108	0.657077	0.807453
	0.493625	0.199412	0.236417	1.1409	0.787839	0.650539	0.807453
	0.493625	0.196143	0.236417	1.13763	0.787839	0.650539	0.807453
	0.490356	0.192873	0.229029	1.12782	0.787839	0.637463	0.804184
	0.490356	0.189604	0.221641	1.11801	0.78457	0.617849	0.797646
	0.483818	0.183066	0.217947	1.10821	0.78457	0.617849	0.797646
	0.480549	0.183066	0.217947	1.10821	0.781301	0.608042	0.794377
	0.480549	0.173259	0.203171	1.10494	0.778032	0.601504	0.787839
	0.47728	0.16999	0.192089	1.09186	0.774763	0.601504	0.787839
	0.47728	0.166721	0.184701	1.09186	0.774763	0.601504	0.787839
	0.474011	0.166721	0.184701	1.08205	0.764956	0.598235	0.78457
	0.474011	0.160183	0.184701	1.07878	0.764956	0.594966	0.78457
	0.474011	0.156914	0.184701	1.07878	0.761687	0.591697	0.781301
	0.467473	0.153645	0.184701	1.07551	0.755149	0.591697	0.778032
	0.467473	0.153645	0.181007	1.07225	0.755149	0.588428	0.778032
	0.457666	0.153645	0.177313	1.06898	0.75188	0.585159	0.778032
	0.454397	0.153645	0.177313	1.06571	0.748611	0.585159	0.774763
	0.447859	0.150376	0.177313	1.06244	0.745342	0.57862	0.774763
	0.447859	0.147107	0.173619	1.05917	0.745342	0.575351	0.771494
	0.447859	0.147107	0.169925	1.04936	0.742073	0.575351	0.768225
	0.44459	0.143838	0.169925	1.03956	0.738804	0.572082	0.764956
	0.438052	0.140569	0.166231	1.02648	0.738804	0.572082	0.764956
	0.438052	0.140569	0.162537	1.02648	0.728996	0.572082	0.764956
	0.434783	0.1373	0.158843	1.01667	0.725727	0.562275	0.761687
	0.431514	0.1373	0.158843	1.0134	0.725727	0.562275	0.748611
	0.431514	0.134031	0.155149	1.01013	0.719189	0.552468	0.745342
	0.421706	0.130762	0.151455	1.01013	0.71592	0.549199	0.745342
	0.421706	0.130762	0.140373	1.00686	0.71592	0.54593	0.742073
	0.418437	0.127493	0.136679	0.997058	0.712651	0.542661	0.735534
	0.411899	0.124224	0.129291	0.997058	0.709382	0.539392	0.725727
	0.411899	0.114416	0.125597	0.997058	0.699575	0.536123	0.722458
	0.411899	0.111147	0.118209	0.993789	0.699575	0.529585	0.719189
	0.411899	0.104609	0.110821	0.980713	0.68323	0.526316	0.719189
	0.40863	0.104609	0.107127	0.980713	0.673423	0.526316	0.712651
	0.405361	0.10134	0.0960445	0.977444	0.673423	0.523047	0.709382
	0.402092	0.0980713	0.0960445	0.974175	0.666885	0.516509	0.706113
	0.398823	0.0948022	0.0886564	0.974175	0.666885	0.51324	0.702844
	0.395554	0.0948022	0.0886564	0.964367	0.663616	0.51324	0.693037
	0.395554	0.0948022	0.0849624	0.961098	0.660347	0.506702	0.693037
	0.392285	0.0882641	0.0849624	0.961098	0.660347	0.500163	0.693037
	0.392285	0.078457	0.0812684	0.961098	0.650539	0.493625	0.693037
	0.392285	0.0719189	0.0812684	0.961098	0.64727	0.493625	0.689768
	0.392285	0.0719189	0.0775744	0.961098	0.644001	0.490356	0.689768
	0.389016	0.0719189	0.0775744	0.944753	0.640732	0.480549	0.689768
	0.389016	0.0653808	0.0701863	0.944753	0.637463	0.47728	0.686499
	0.389016	0.0653808	0.0701863	0.941484	0.637463	0.47728	0.676692
	0.389016	0.0588428	0.0664923	0.928408	0.637463	0.47728	0.676692
	0.385747	0.0588428	0.0627983	0.928408	0.637463	0.47728	0.673423
	0.385747	0.0588428	0.0591043	0.925139	0.634194	0.470742	0.673423
	0.382478	0.0555737	0.0591043	0.925139	0.630925	0.464204	0.673423
	0.372671	0.0523047	0.0591043	0.918601	0.627656	0.464204	0.670154
	0.372671	0.0490356	0.0554103	0.915332	0.624387	0.464204	0.657077
	0.366133	0.0457666	0.0554103	0.915332	0.621118	0.460935	0.653808
	0.366133	0.0457666	0.0480222	0.912063	0.61458	0.454397	0.653808
	0.366133	0.0424975	0.0443282	0.908794	0.61458	0.451128	0.650539
	0.359595	0.0392285	0.0369402	0.905525	0.611311	0.451128	0.650539
	0.353057	0.0392285	0.0332462	0.902256	0.611311	0.44459	0.64727
	0.353057	0.0392285	0.0258581	0.902256	0.608042	0.44459	0.64727
	0.353057	0.0359595	0.0221641	0.898987	0.604773	0.441321	0.64727
	0.353057	0.0359595	0.0221641	0.892449	0.598235	0.438052	0.644001
	0.349788	0.0294214	0.0221641	0.88591	0.594966	0.431514	0.640732
	0.349788	0.0228833	0.0147761	0.879372	0.588428	0.431514	0.634194
	0.349788	0.0228833	0.0110821	0.872834	0.585159	0.424975	0.630925
	0.346518	0.0196143	0	0.872834	0.585159	0.424975	0.627656
	0.346518	0.0196143	0	0.869565	0.585159	0.424975	0.624387
	0.343249	0.0130762	0	0.866296	0.585159	0.421706	0.624387
	0.33998	0.00980713	0	0.863027	0.572082	0.40863	0.617849
	0.336711	0.00980713	0	0.856489	0.572082	0.405361	0.608042
	0.336711	0.00980713	0	0.856489	0.562275	0.402092	0.601504
	0.336711	0.00653808	0	0.85322	0.562275	0.398823	0.601504
	0.330173	0	0	0.85322	0.559006	0.395554	0.601504
	0.330173	0	0	0.85322	0.555737	0.385747	0.601504
	0.330173	0	0	0.843413	0.54593	0.382478	0.594966
	0.326904	0	0	0.836875	0.532854	0.382478	0.591697
	0.326904	0	0	0.833606	0.526316	0.382478	0.588428
	0.320366	0	0	0.833606	0.519778	0.379209	0.585159
	0.317097	0	0	0.833606	0.509971	0.379209	0.585159
	0.317097	0	0	0.830337	0.506702	0.379209	0.585159
	0.317097	0	0	0.823799	0.506702	0.37594	0.585159
	0.313828	0	0	0.823799	0.500163	0.37594	0.572082
	0.310559	0	0	0.823799	0.496894	0.372671	0.572082
	0.30729	0	0	0.817261	0.490356	0.366133	0.568813
	0.30729	0	0	0.810722	0.490356	0.362864	0.565544
	0.300752	0	0	0.810722	0.487087	0.362864	0.559006
	0.297483	0	0	0.807453	0.483818	0.359595	0.555737
	0.297483	0	0	0.797646	0.480549	0.356326	0.552468
	0.294214	0	0	0.794377	0.47728	0.353057	0.542661
	0.290945	0	0	0.781301	0.474011	0.349788	0.542661
	0.290945	0	0	0.781301	0.451128	0.33998	0.539392
	0.287676	0	0	0.764956	0.447859	0.33998	0.539392
	0.284407	0	0	0.761687	0.44459	0.33998	0.536123
	0.277869	0	0	0.758418	0.428245	0.336711	0.529585
	0.277869	0	0	0.75188	0.428245	0.336711	0.526316
	0.277869	0	0	0.75188	0.418437	0.333442	0.519778
	0.271331	0	0	0.748611	0.418437	0.333442	0.516509
	0.268061	0	0	0.742073	0.40863	0.330173	0.509971
	0.264792	0	0	0.735534	0.40863	0.320366	0.506702
	0.264792	0	0	0.732265	0.405361	0.320366	0.506702
	0.261523	0	0	0.728996	0.402092	0.317097	0.506702
	0.261523	0	0	0.728996	0.395554	0.313828	0.503432
	0.254985	0	0	0.728996	0.389016	0.30729	0.496894
	0.248447	0	0	0.712651	0.385747	0.30729	0.493625
	0.248447	0	0	0.712651	0.385747	0.300752	0.493625
	0.245178	0	0	0.712651	0.372671	0.297483	0.493625
	0.245178	0	0	0.709382	0.362864	0.297483	0.490356
	0.23864	0	0	0.706113	0.362864	0.297483	0.483818
	0.235371	0	0	0.673423	0.359595	0.294214	0.467473
	0.235371	0	0	0.673423	0.349788	0.290945	0.467473
	0.232102	0	0	0.666885	0.330173	0.284407	0.464204
	0.232102	0	0	0.653808	0.323635	0.277869	0.464204
	0.232102	0	0	0.653808	0.323635	0.277869	0.464204
	0.228833	0	0	0.653808	0.313828	0.2746	0.464204
	0.228833	0	0	0.653808	0.297483	0.268061	0.454397
	0.228833	0	0	0.650539	0.294214	0.264792	0.451128
	0.228833	0	0	0.650539	0.287676	0.254985	0.438052
	0.222295	0	0	0.644001	0.271331	0.254985	0.434783
	0.215757	0	0	0.621118	0.258254	0.254985	0.434783
	0.215757	0	0	0.61458	0.251716	0.251716	0.431514
	0.212488	0	0	0.61458	0.251716	0.251716	0.431514
	0.209219	0	0	0.604773	0.241909	0.251716	0.431514
	0.20595	0	0	0.604773	0.235371	0.245178	0.424975
	0.20595	0	0	0.604773	0.232102	0.241909	0.421706
	0.202681	0	0	0.601504	0.228833	0.23864	0.421706
	0.196143	0	0	0.598235	0.215757	0.225564	0.421706
	0.196143	0	0	0.591697	0.212488	0.219026	0.415168
	0.196143	0	0	0.588428	0.212488	0.215757	0.411899
	0.192873	0	0	0.58189	0.202681	0.212488	0.405361
	0.189604	0	0	0.58189	0.199412	0.202681	0.395554
	0.189604	0	0	0.57862	0.192873	0.202681	0.392285
	0.186335	0	0	0.57862	0.179797	0.199412	0.392285
	0.183066	0	0	0.575351	0.16999	0.199412	0.392285
	0.179797	0	0	0.539392	0.166721	0.196143	0.385747
	0.176528	0	0	0.532854	0.147107	0.189604	0.379209
	0.176528	0	0	0.529585	0.143838	0.173259	0.372671
	0.176528	0	0	0.519778	0.140569	0.160183	0.372671
	0.173259	0	0	0.516509	0.140569	0.153645	0.372671
	0.16999	0	0	0.51324	0.1373	0.150376	0.369402
	0.16999	0	0	0.506702	0.1373	0.150376	0.369402
	0.166721	0	0	0.496894	0.134031	0.147107	0.366133
	0.166721	0	0	0.493625	0.134031	0.147107	0.366133
	0.166721	0	0	0.487087	0.120955	0.140569	0.366133
	0.163452	0	0	0.47728	0.120955	0.1373	0.359595
	0.160183		0	0.467473	0.114416	0.127493	0.356326
	0.156914		0	0.467473	0.107878	0.120955	0.356326
	0.153645		0	0.441321	0.104609	0.111147	0.353057
	0.153645		0	0.434783	0.0915332	0.104609	0.353057
	0.1373		0	0.431514	0.0915332	0.0948022	0.346518
	0.134031		0	0.421706	0.0849951	0.0948022	0.343249
	0.134031			0.421706	0.0817261	0.0948022	0.33998
	0.134031			0.418437	0.078457	0.0948022	0.336711
	0.124224			0.40863	0.0719189	0.0817261	0.336711
	0.120955			0.405361	0.0686499	0.078457	0.336711
	0.120955			0.395554	0.0555737	0.075188	0.333442
	0.114416			0.395554	0.0555737	0.0719189	0.326904
	0.111147			0.392285	0.0326904	0.0653808	0.317097
	0.107878			0.372671	0.0294214	0.0653808	0.30729
	0.107878			0.359595	0.0228833	0.0621118	0.30729
	0.10134			0.359595	0.0196143	0.0588428	0.300752
	0.10134			0.359595	0.0130762	0.0424975	0.297483
	0.10134			0.359595	0	0.0392285	0.294214
	0.0915332			0.359595	0	0.0359595	0.287676
	0.0915332			0.359595	0	0.0326904	0.284407
	0.0882641			0.356326	0	0.0228833	0.2746
	0.0882641			0.346518	0	0.0163452	0.2746
	0.0849951			0.330173	0	0.0163452	0.2746
	0.0817261			0.320366	0	0.00980713	0.271331
	0.0817261			0.317097	0	0.00653808	0.271331
	0.078457			0.30729	0	0.00653808	0.271331
	0.0719189			0.304021	0	0	0.268061
	0.0719189			0.300752	0	0	0.268061
	0.0686499			0.290945	0	0	0.258254
	0.0588428			0.287676	0	0	0.248447
	0.0555737			0.281138	0	0	0.248447
	0.0523047			0.268061	0	0	0.245178
	0.0523047			0.268061	0	0	0.245178
	0.0457666			0.268061	0	0	0.241909
	0.0424975			0.264792	0	0	0.241909
	0.0392285			0.261523	0	0	0.232102
	0.0392285			0.261523	0	0	0.225564
	0.0359595			0.251716	0	0	0.222295
	0.0326904			0.248447	0	0	0.222295
	0.0326904			0.248447	0	0	0.209219
	0.0326904			0.241909	0	0	0.202681
	0.0196143			0.23864	0	0	0.202681
	0.0196143			0.232102	0	0	0.196143
	0.00980713			0.222295		0	0.189604
	0.00653808			0.222295		0	0.189604
	0.00653808			0.219026		0	0.179797
	0.00653808			0.212488		0	0.179797
	0.00326904			0.212488		0	0.176528
	0			0.20595		0	0.16999
	-1.08881e-15			0.196143		0	0.163452
	0			0.189604		0	0.160183
	0			0.183066		0	0.160183
	0			0.173259		0	0.160183
	0			0.163452		0	0.160183
	0			0.160183		0	0.156914
	0			0.160183		0	0.150376
	0			0.1373		0	0.150376
	0			0.134031		0	0.147107
	0			0.130762		0	0.140569
	0			0.0948022		0	0.130762
	0			0.0915332		0	0.104609
	0			0.0719189		0	0.0980713
	0			0.0653808		0	0.0980713
	0			0.0621118		0	0.0948022
	0			0.0588428		0	0.0948022
	0			0.0523047		0	0.0817261
	0			0.0424975		0	0.078457
	0			0.0424975		0	0.0719189
	0			0.0326904		0	0.0621118
	0			0.0294214		0	0.0588428
	0			0.0294214		0	0.0523047
	0			0.0228833		0	0.0523047
	0			0.0130762		0	0.0457666
	0			0.00653808		0	0.0424975
	0			0.00326904		0	0.0392285
	0			0		0	0.0261523
	0			0		0	0.0261523
	0			0		0	0.0130762
	0			0		0	0.0130762
	0			0		0	0.00980713
	0			0		0	0.00980713
	0			0		0	0
	0			0		0	0
	0			0		0	0
	0			0		0	0
	0			0		0	0
	0			0		0	0
	0			0		0	0
	0			0		0	0
	0			0		0	0
	0			0		0	0
	0			0		0	0
	0			0		0	0
	0			0		0	0
	0			0			0
	0			0			0
	0			0			0
	0			0			0
	0			0			0
	0			0			0
	0			0			0
	0			0			0
	0			0			0
	0			0			0
	0			0			0
	0			0			0
	0						0
	0						0
	0						0
	0						0
	0						0
	0						0
	0						0
	0						0
	0						0
	0						0
	0						0
	0						0
	0						0
	0						0
	0						0
	0						0
	0						0
	0						0
							0
							0
							0
							0
							0
							0
							0
							0
							0
							0
							0
							0
							0
							0
