# Supplementary material for: Competition in the chaperone-client network subordinates cell-cycle entry to growth and stress
Source: Life Sci Alliance. 2019 Apr 15;2(2):e201800277. doi: 10.26508/lsa.201800277 (PMC6467244; doi:10.26508/lsa.201800277)
Supplement: Supplementary file 5 [file LSA-2018-00277_SdataF5.xlsx]

## Sheet: Panel B
Predictions of Ydj1A and Cln3F levels after stress
	%F to U = 20			%F to U = 40			%F to U = 60			%F to U = 80
time (r.u.)	Ydj1A	Cln3F		Ydj1A	Cln3F		Ydj1A	Cln3F		Ydj1A	Cln3F
0	0.124308	0.27667		0.124308	0.27667		0.124308	0.27667		0.124308	0.27667
1	0.124308	0.22134		0.124308	0.166005		0.124308	0.11067		0.124308	0.0553351
2	0.0647373	0.222216		0.0437949	0.168773		0.0331091	0.115556		0.0266181	0.062344
3	0.0669817	0.221842		0.0459006	0.169755		0.0349216	0.118283		0.0281835	0.066898
4	0.069249	0.220903		0.048043	0.169798		0.0367884	0.119783		0.0298084	0.0699907
5	0.0714938	0.219716		0.050218	0.169349		0.0387087	0.120586		0.0314936	0.0722182
6	0.0737119	0.218474		0.0524217	0.168681		0.0406807	0.121023		0.0332388	0.073952
7	0.0758989	0.217291		0.0546496	0.167966		0.042702	0.121299		0.0350431	0.0754255
8	0.0780503	0.216234		0.056897	0.167309		0.0447695	0.121544		0.0369053	0.0767855
9	0.0801617	0.21534		0.0591582	0.166771		0.0468795	0.121837		0.0388232	0.0781251
10	0.0822289	0.214628		0.0614277	0.166389		0.0490278	0.122228		0.0407943	0.0795029
11	0.0842481	0.214102		0.0636996	0.166184		0.0512097	0.122748		0.0428156	0.080956
12	0.0862158	0.213761		0.0659679	0.166164		0.0534204	0.123414		0.0448835	0.0825075
13	0.0881288	0.2136		0.0682268	0.166333		0.0556544	0.124235		0.0469942	0.0841716
14	0.0899845	0.213609		0.0704703	0.166687		0.0579061	0.125215		0.0491433	0.0859564
15	0.0917806	0.213778		0.0726926	0.167222		0.0601698	0.126354		0.051326	0.0878661
16	0.0935154	0.214095		0.0748883	0.167931		0.0624395	0.127651		0.0535373	0.0899023
17	0.0951876	0.214549		0.0770521	0.168805		0.0647092	0.129101		0.0557717	0.0920646
18	0.0967961	0.215129		0.079179	0.169835		0.0669729	0.1307		0.0580235	0.0943512
19	0.0983404	0.215822		0.0812644	0.171012		0.0692245	0.13244		0.0602871	0.096759
20	0.0998204	0.216617		0.083304	0.172324		0.0714583	0.134315		0.0625564	0.0992842
21	0.101236	0.217503		0.085294	0.173762		0.0736686	0.136318		0.0648254	0.101922
22	0.102588	0.218471		0.0872312	0.175315		0.0758499	0.13844		0.0670881	0.104667
23	0.103877	0.219509		0.0891124	0.176972		0.0779971	0.140673		0.0693385	0.107514
24	0.105105	0.220608		0.0909354	0.178723		0.0801054	0.143008		0.0715707	0.110455
25	0.106271	0.22176		0.0926979	0.180558		0.0821703	0.145436		0.0737792	0.113484
26	0.107379	0.222955		0.0943986	0.182466		0.0841878	0.147948		0.0759585	0.116594
27	0.108428	0.224187		0.0960362	0.184438		0.0861542	0.150535		0.0781034	0.119777
28	0.109422	0.225448		0.0976099	0.186464		0.0880663	0.153186		0.0802092	0.123026
29	0.110362	0.226731		0.0991194	0.188535		0.0899216	0.155895		0.0822714	0.126331
30	0.11125	0.22803		0.100565	0.190642		0.0917176	0.15865		0.084286	0.129685
31	0.112088	0.229339		0.101946	0.192777		0.0934526	0.161444		0.0862494	0.133079
32	0.112877	0.230654		0.103265	0.194931		0.0951251	0.164267		0.0881585	0.136506
33	0.113621	0.231969		0.104521	0.197099		0.0967342	0.167111		0.0900106	0.139957
34	0.11432	0.23328		0.105715	0.199271		0.0982793	0.169969		0.0918033	0.143423
35	0.114978	0.234584		0.10685	0.201444		0.0997603	0.172833		0.093535	0.146898
36	0.115596	0.235876		0.107927	0.203609		0.101177	0.175694		0.0952042	0.150373
37	0.116176	0.237155		0.108947	0.205762		0.102531	0.178547		0.0968099	0.153842
38	0.11672	0.238417		0.109912	0.207898		0.103821	0.181385		0.0983518	0.157296
39	0.11723	0.23966		0.110825	0.210012		0.10505	0.184202		0.0998294	0.160729
40	0.117708	0.240882		0.111686	0.2121		0.106218	0.186993		0.101243	0.164135
41	0.118155	0.242081		0.112498	0.214158		0.107327	0.189752		0.102593	0.167508
42	0.118573	0.243256		0.113264	0.216185		0.108379	0.192475		0.103881	0.170843
43	0.118965	0.244405		0.113984	0.218175		0.109375	0.195158		0.105106	0.174134
44	0.119331	0.245529		0.114662	0.220128		0.110316	0.197797		0.106272	0.177378
45	0.119673	0.246625		0.115299	0.222041		0.111206	0.200389		0.107378	0.180568
46	0.119992	0.247693		0.115897	0.223912		0.112045	0.202931		0.108427	0.183703
47	0.120291	0.248734		0.116458	0.22574		0.112837	0.205421		0.10942	0.186779
48	0.120569	0.249745		0.116984	0.227524		0.113582	0.207856		0.110359	0.189793
49	0.120829	0.250729		0.117477	0.229263		0.114284	0.210235		0.111246	0.192742
50	0.121071	0.251683		0.117939	0.230956		0.114944	0.212556		0.112083	0.195624
51	0.121297	0.252609		0.118371	0.232603		0.115563	0.214819		0.112873	0.198438
52	0.121508	0.253507		0.118776	0.234204		0.116145	0.217023		0.113616	0.201183
53	0.121705	0.254377		0.119154	0.235758		0.116691	0.219167		0.114315	0.203857
54	0.121888	0.255219		0.119508	0.237266		0.117202	0.22125		0.114973	0.206459
55	0.122058	0.256034		0.119838	0.238728		0.117681	0.223274		0.115591	0.20899
56	0.122217	0.256822		0.120147	0.240145		0.11813	0.225237		0.116171	0.211449
57	0.122365	0.257583		0.120435	0.241517		0.11855	0.227141		0.116715	0.213837
58	0.122503	0.258318		0.120704	0.242844		0.118943	0.228986		0.117225	0.216152
59	0.122631	0.259029		0.120955	0.244127		0.119311	0.230773		0.117703	0.218397
60	0.122751	0.259714		0.121189	0.245368		0.119654	0.232502		0.11815	0.220572
61	0.122862	0.260376		0.121407	0.246567		0.119975	0.234174		0.118569	0.222678
62	0.122966	0.261013		0.12161	0.247724		0.120274	0.235791		0.118961	0.224715
63	0.123062	0.261628		0.1218	0.248841		0.120554	0.237353		0.119327	0.226685
64	0.123152	0.262221		0.121976	0.249919		0.120815	0.238861		0.119669	0.228588
65	0.123235	0.262792		0.122141	0.250959		0.121058	0.240317		0.119989	0.230428
66	0.123313	0.263343		0.122294	0.251961		0.121285	0.241722		0.120288	0.232203
67	0.123385	0.263873		0.122437	0.252927		0.121497	0.243077		0.120567	0.233917
68	0.123452	0.264383		0.12257	0.253858		0.121695	0.244383		0.120827	0.235571
69	0.123514	0.264874		0.122694	0.254755		0.121878	0.245642		0.121069	0.237165
70	0.123573	0.265347		0.122809	0.255619		0.12205	0.246856		0.121296	0.238702
71	0.123627	0.265802		0.122917	0.25645		0.12221	0.248025		0.121507	0.240184
72	0.123677	0.26624		0.123017	0.25725		0.122358	0.24915		0.121704	0.241611
73	0.123724	0.266661		0.123109	0.258021		0.122497	0.250234		0.121887	0.242985
74	0.123767	0.267066		0.123196	0.258762		0.122626	0.251277		0.122058	0.244309
75	0.123808	0.267456		0.123276	0.259475		0.122746	0.252282		0.122217	0.245583
76	0.123845	0.267831		0.123351	0.260161		0.122858	0.253248		0.122365	0.24681
77	0.12388	0.268191		0.123421	0.260821		0.122962	0.254177		0.122503	0.24799
78	0.123913	0.268538		0.123486	0.261456		0.123059	0.255071		0.122632	0.249126
79	0.123943	0.268871		0.123546	0.262066		0.123149	0.255931		0.122752	0.250218
80	0.123972	0.269191		0.123602	0.262653		0.123233	0.256758		0.122863	0.251268
81	0.123998	0.269499		0.123654	0.263217		0.123311	0.257553		0.122967	0.252278
82	0.124022	0.269796		0.123703	0.263759		0.123383	0.258317		0.123063	0.25325
83	0.124045	0.27008		0.123748	0.26428		0.123451	0.259052		0.123153	0.254183
84	0.124066	0.270354		0.12379	0.264781		0.123514	0.259758		0.123237	0.255081
85	0.124086	0.270617		0.123829	0.265262		0.123572	0.260437		0.123315	0.255944
86	0.124104	0.270869		0.123865	0.265725		0.123626	0.261089		0.123387	0.256773
87	0.124121	0.271112		0.123899	0.26617		0.123677	0.261716		0.123454	0.25757
88	0.124137	0.271346		0.123931	0.266597		0.123724	0.262319		0.123517	0.258336
89	0.124151	0.27157		0.12396	0.267008		0.123768	0.262897		0.123575	0.259072
90	0.124165	0.271786		0.123987	0.267402		0.123808	0.263454		0.12363	0.259779
91	0.124178	0.271993		0.124012	0.267781		0.123846	0.263988		0.12368	0.260458
92	0.12419	0.272193		0.124036	0.268146		0.123882	0.264502		0.123727	0.261111
93	0.124201	0.272384		0.124058	0.268496		0.123914	0.264995		0.123771	0.261738
94	0.124211	0.272568		0.124078	0.268832		0.123945	0.265469		0.123811	0.26234
95	0.12422	0.272745		0.124097	0.269156		0.123973	0.265924		0.123849	0.262919
96	0.124229	0.272915		0.124115	0.269466		0.124	0.266362		0.123884	0.263475
97	0.124238	0.273079		0.124131	0.269765		0.124024	0.266782		0.123917	0.264009
98	0.124245	0.273236		0.124146	0.270051		0.124047	0.267186		0.123947	0.264522
99	0.124253	0.273387		0.124161	0.270327		0.124068	0.267574		0.123975	0.265015
100	0.124259	0.273532		0.124174	0.270592		0.124088	0.267947		0.124002	0.265488

## Sheet: Panel C
Ydj1-GFP diffusion after heat stress and Ydj1A model predictions
	experimental			predicted
time (min)	D	CL(0.05)		D
0	4.43226	0.772122		4.43226
2.5	2.44578	0.873889		1.4478
5	2.12388	0.776909		2.03971
7.5	3.53585	1.00662		2.78086
10	3.58516	0.840944		3.40364
12.5	5.36994	1.23734		3.91818
15	4.84012	1.01952		4.34406
17.5	4.95691	0.761381		4.60714
20	4.13594	1.3348		4.7933
22.5	4.61665	1.16896		4.94378
25	4.00857	1.17652		5.04566
27.5	5.19564	1.46617		5.12969
30	5.36655	0.804449		5.21138

## Sheet: Panel D
Ydj1-GFP diffusion after salt stress and Ydj1A model predictions
	Experimental			Predicted
time (min)	D	CL(0.05)		D
0	4.79263	0.494562		4.79263
3	2.26758	0.780753		1.74847
6	2.59056	0.684649		2.31354
9	3.14479	0.757444		2.97909
12	3.35855	0.516701		3.49938
15	4.40228	0.65108		3.96346
18	3.79489	0.680009		4.24816
21	4.4227	0.673246		4.43835
24	4.79831	0.773901		4.57233
27	4.83589	0.820298		4.64139
30	5.17282	0.611124		4.68656

## Sheet: Panel G
Cln3-3HA nuclear to cytoplasmic levels after heat stress and model predictions
					Predicted with		Predicted with
	Experimental				competition		no competition
time (min)	mean	CL(0.05)		time (min)	Cln3F		Cln3F
0	1	0.0927119		0	1		1
2	0.407407	0.0794783		0.29901	0.200004		0.200004
5	0.362637	0.123513		0.598021	0.225405		0.234099
10	0.464789	0.0971939		0.897031	0.24205		0.269354
15	0.967742	0.0938521		1.19604	0.253536		0.304845
20	1.37032	0.133747		1.49505	0.262023		0.340023
30	1.48295	0.109601		1.79406	0.268862		0.374551
				2.09307	0.274903		0.408226
				2.39208	0.280689		0.440937
				2.69109	0.286562		0.472621
				2.9901	0.292746		0.503257
				3.28911	0.299384		0.532848
				3.58812	0.306568		0.561402
				3.88713	0.314359		0.588947
				4.18615	0.322795		0.615517
				4.48516	0.3319		0.641136
				4.78417	0.341687		0.665847
				5.08318	0.352163		0.689688
				5.38219	0.363325		0.71269
				5.6812	0.375173		0.734894
				5.98021	0.387693		0.756338
				6.27922	0.400875		0.777056
				6.57823	0.4147		0.79708
				6.87724	0.42915		0.816449
				7.17625	0.444197		0.83519
				7.47526	0.459822		0.853338
				7.77427	0.475993		0.870922
				8.07328	0.492677		0.887971
				8.37229	0.509846		0.904511
				8.6713	0.527455		0.920562
				8.97031	0.545477		0.936159
				9.26932	0.563867		0.951317
				9.56833	0.582586		0.966064
				9.86734	0.601594		0.980417
				10.1664	0.620855		0.994394
				10.4654	0.640322		1.00802
				10.7644	0.659956		1.0213
				11.0634	0.679716		1.03427
				11.3624	0.69957		1.04693
				11.6614	0.719471		1.05929
				11.9604	0.739386		1.07138
				12.2594	0.759276		1.08321
				12.5584	0.779116		1.09478
				12.8574	0.798869		1.10612
				13.1565	0.818506		1.11722
				13.4555	0.837998		1.12811
				13.7545	0.857321		1.13878
				14.0535	0.876452		1.14925
				14.3525	0.89537		1.15953
				14.6515	0.914053		1.16963
				14.9505	0.93249		1.17955
				15.2495	0.95066		1.1893
				15.5485	0.968555		1.19888
				15.8475	0.98616		1.20831
				16.1466	1.00347		1.21759
				16.4456	1.02048		1.22672
				16.7446	1.03717		1.23571
				17.0436	1.05355		1.24457
				17.3426	1.06961		1.25329
				17.6416	1.08535		1.26189
				17.9406	1.10077		1.27037
				18.2396	1.11587		1.27873
				18.5386	1.13066		1.28697
				18.8377	1.14513		1.29511
				19.1367	1.15929		1.30314
				19.4357	1.17314		1.31106
				19.7347	1.18668		1.31888
				20.0337	1.19993		1.3266
				20.3327	1.21288		1.33423
				20.6317	1.22555		1.34176
				20.9307	1.23793		1.34921
				21.2297	1.25004		1.35657
				21.5287	1.26188		1.36383
				21.8278	1.27345		1.37102
				22.1268	1.28477		1.37813
				22.4258	1.29584		1.38515
				22.7248	1.30667		1.3921
				23.0238	1.31727		1.39896
				23.3228	1.32763		1.40576
				23.6218	1.33777		1.41248
				23.9208	1.3477		1.41913
				24.2198	1.35742		1.42571
				24.5189	1.36694		1.43222
				24.8179	1.37625		1.43867
				25.1169	1.38538		1.44505
				25.4159	1.39433		1.45136
				25.7149	1.4031		1.45761
				26.0139	1.41169		1.4638
				26.3129	1.42012		1.46992
				26.6119	1.42839		1.47599
				26.9109	1.4365		1.482
				27.2099	1.44446		1.48795
				27.509	1.45227		1.49384
				27.808	1.45995		1.49968
				28.107	1.46748		1.50546
				28.406	1.47488		1.51119
				28.705	1.48216		1.51687
				29.004	1.4893		1.52249
				29.303	1.49633		1.52806
				29.602	1.50325		1.53358
				29.901	1.51005		1.53905

## Sheet: Panel H
Cln3-3HA nuclear to cytoplasmic levels after salt stress and model predictions
					Predicted with		Predicted with
	Experimental				competition		no competition
time (min)	mean	CL(0.05)		time (min)	Cln3F		Cln3F
0	1	0.0865149		0	1		1
2	0.402493	0.0835482		0.403858	0.400007		0.400007
5	0.421937	0.0682756		0.807716	0.41766		0.426656
10	0.448529	0.0869265		1.21157	0.427498		0.453446
15	0.635417	0.0895528		1.61543	0.432895		0.479799
20	0.841721	0.0770463		2.01929	0.435757		0.505367
30	1.01311	0.105388		2.42315	0.437286		0.529953
				2.827	0.438222		0.553454
				3.23086	0.439032		0.57583
				3.63472	0.440001		0.597076
				4.03858	0.441313		0.617215
				4.44244	0.443073		0.636274
				4.84629	0.445346		0.654296
				5.25015	0.448166		0.671323
				5.65401	0.451542		0.687407
				6.05787	0.455478		0.702595
				6.46172	0.459963		0.71693
				6.86558	0.464987		0.730455
				7.26944	0.470528		0.743221
				7.6733	0.476564		0.755264
				8.07716	0.483066		0.766632
				8.48101	0.490013		0.777352
				8.88487	0.497372		0.787472
				9.28873	0.505114		0.797018
				9.69259	0.513203		0.806029
				10.0964	0.521614		0.814534
				10.5003	0.53031		0.822558
				10.9042	0.539256		0.830133
				11.308	0.548422		0.837286
				11.7119	0.55778		0.844038
				12.1157	0.567286		0.85041
				12.5196	0.576918		0.856428
				12.9234	0.586645		0.862114
				13.3273	0.596436		0.867481
				13.7312	0.60626		0.872552
				14.135	0.616095		0.877341
				14.5389	0.625908		0.881863
				14.9427	0.635685		0.886135
				15.3466	0.645397		0.890172
				15.7505	0.655026		0.893986
				16.1543	0.664553		0.897589
				16.5582	0.673958		0.90099
				16.962	0.683229		0.904204
				17.3659	0.692348		0.90724
				17.7697	0.701305		0.910106
				18.1736	0.710088		0.912813
				18.5775	0.718687		0.915372
				18.9813	0.727094		0.917783
				19.3852	0.735302		0.920064
				19.789	0.743308		0.922211
				20.1929	0.751108		0.924242
				20.5967	0.758694		0.926154
				21.0006	0.766064		0.927957
				21.4045	0.773221		0.929656
				21.8083	0.78016		0.931257
				22.2122	0.786887		0.932765
				22.616	0.793396		0.934185
				23.0199	0.799693		0.935519
				23.4238	0.805779		0.936777
				23.8276	0.811656		0.937955
				24.2315	0.817331		0.939061
				24.6353	0.8228		0.940098
				25.0392	0.82807		0.941071
				25.443	0.833148		0.941981
				25.8469	0.838034		0.942831
				26.2508	0.842733		0.943626
				26.6546	0.847251		0.944367
				27.0585	0.851596		0.945057
				27.4623	0.855767		0.945697
				27.8662	0.859768		0.946293
				28.27	0.86361		0.946843
				28.6739	0.867293		0.947352
				29.0778	0.870824		0.947822
				29.4816	0.874208		0.948252
				29.8855	0.877446		0.948646
